# Supplementary material for: Activation of Vitamin D Receptor Pathway Enhances Differentiating Capacity in Acute Myeloid Leukemia with Isocitrate Dehydrogenase Mutations
Source: MDPI journal article supplement (doi:10.3390/cancers13205243), 2021-10-19
Supplement: s1 [file s1]

**Table S3 : ATRA- and VD-responsive genes enriched in IDHMUT-AML and HL60WT +2HG**

| ATRA and VD responsive genes | ATRA responsive genes |          |         |         | VD responsive genes |
|------------------------------|-----------------------|----------|---------|---------|---------------------|
| ITGAM                        | CD180                 | HOXD8    | BTBD11  | IRF8    | SLC2A3              |
| ICAM1                        | NPDC1                 | NCF2     | HOXB2   | HOXA9   | KLF10               |
| CEBPE                        | PPARD                 | BCL6     | CSF3    | GPRC5A  | TNF                 |
| THEMIS2                      | OTUD7B                | NME3     | IL6ST   | HOXA3   | P2RX7               |
| MYCN                         | IFIT5                 | ZSCAN4   | CD33    | BST1    | MPO                 |
| RXRA                         | ANXA2                 | KLF5     | DHRS3   | SMAD5   | VIM                 |
| ITGAX                        | ADIG                  | MEIS1    | SCPEP1  | IL5RA   | CD86                |
|                              | ITGA5                 | HNF1B    | POU4F1  | BCL2A1  | TNFAIP3             |
|                              | IFIT1                 | FGR      | RBP4    | CD38    | CD80                |
|                              | MIR223                | TNFAIP2  | IL6R    | CEBPA   | TXNIP               |
|                              | CLTCL1                | CEACAM6  | HOXB6   | HK3     | SELL                |
|                              | TAGLN                 | CCR6     | FUT4    | CYP4F2  | CXCL8               |
|                              | CCDC26                | PALD1    | RAB39A  | DHRS9   | NFATC2              |
|                              | HOXB1                 | JUN      | MYCL    | ASB2    | CD68                |
|                              | BLNK                  | CD1D     | CHD7    | CNTN4   | CCR7                |
|                              | CCNA1                 | NOG      | SOX14   | CCND1   | MNDA                |
|                              | MGAT5                 | KRT80    | HSD17B6 | IGFBP2  | ITGA6               |
|                              | SLC26A3               | SOX3     | HIC1    | GALM    |                     |
|                              | HBZ                   | RBP1     | GRN     | ZRSR1   |                     |
|                              | COL8A2                | APBB1IP  | HOXA4   | S100A9  |                     |
|                              | LMNA                  | CXCL16   | HES1    | CCRL2   |                     |
|                              | HOXC6                 | DUOX2    | CFD     | EXOC6B  |                     |
|                              | SPZ1                  | FGF8     | CBX2    | IL23R   |                     |
|                              | HPR                   | ZBTB16   | RET     | KLF4    |                     |
|                              | RBP7                  | NEDD9    | PBX3    | THBD    |                     |
|                              | IER3                  | TGFB1    | ENO2    | MECOM   |                     |
|                              | PRICKLE1              | SMPD3    | TLR3    | FIGF    |                     |
|                              | WNT5B                 | CSF3R    | ANPEP   | ZSCAN10 |                     |
|                              | ZNF536                | SERPINF1 | CCL24   | CYP2C18 |                     |
|                              | PRAME                 | CD300LB  | HOXA5   | CD14    |                     |
|                              |                       | PTGDS    |         |         |                     |
