# Supplementary material for: Activation of Vitamin D Receptor Pathway Enhances Differentiating Capacity in Acute Myeloid Leukemia with Isocitrate Dehydrogenase Mutations
Source: MDPI journal article supplement (doi:10.3390/cancers13205243), 2021-10-19
Supplement: s1 [file s1]

**Table S2 : List of Pharmacological Substances by cohort (related to Figure 1A)**

**Pharmacological Substances (Genomatix) enriched in IDH1<sup>MUT</sup> patient (Verhaak)**

ATRA-related Gene signature

VD-related Gene Signature

| Pharmacological substance                | Pharmacological substance id | P-value  | Adjusted p-value | # Genes (observed) | # Genes (expected) | # Genes (total) |
|------------------------------------------|------------------------------|----------|------------------|--------------------|--------------------|-----------------|
| TRETINOIN                                | C0040845                     | 1.58E-03 | n/a              | 94                 | 69.75693547        | 989             |
| HEPARIN                                  | C0019134                     | 2.38E-04 | n/a              | 50                 | 29.9764384         | 425             |
| PORCINE HEPARIN                          | C0770546                     | 2.66E-04 | n/a              | 50                 | 30.11750399        | 427             |
| POLYSACCHARIDES                          | C0032594                     | 1.65E-04 | n/a              | 44                 | 24.96860987        | 354             |
| BROMODEOXYURIDINE                        | C0006233                     | 5.43E-03 | n/a              | 40                 | 26.37926579        | 374             |
| INTERFERON TYPE I                        | C0021743                     | 1.73E-04 | n/a              | 39                 | 21.30090446        | 302             |
| IONOMYCIN                                | C0022020                     | 2.20E-04 | n/a              | 38                 | 20.80717489        | 295             |
| GLYCOSAMINOGLYCANS                       | C0017973                     | 2.51E-03 | n/a              | 35                 | 21.30090446        | 302             |
| ATORVASTATIN                             | C0286651                     | 7.12E-06 | n/a              | 34                 | 15.16455119        | 215             |
| INTERLEUKIN 12                           | C0123759                     | 3.08E-07 | n/a              | 32                 | 12.06110816        | 171             |
| CYTOCHALASINS                            | C0010739                     | 4.23E-04 | n/a              | 32                 | 17.06893669        | 242             |
| OLEIC ACID                               | C0028928                     | 3.53E-03 | n/a              | 32                 | 19.39651896        | 275             |
| RECOMBINANT INTERFERON                   | C1522537                     | 7.61E-05 | n/a              | 31                 | 14.88242           | 211             |
| DITHIOTHREITOL                           | C0012789                     | 1.72E-03 | n/a              | 31                 | 17.77426465        | 252             |
| VITAMIN A                                | C0042839                     | 2.20E-03 | n/a              | 31                 | 18.05639583        | 256             |
| ALLERGEN                                 | C3274161                     | 4.57E-05 | n/a              | 30                 | 13.82442806        | 196             |
| INTERFERONS                              | C0021747                     | 1.80E-04 | n/a              | 30                 | 14.88242           | 211             |
| INTERFERON                               | C3652465                     | 1.80E-04 | n/a              | 30                 | 14.88242           | 211             |
| HUMAN LEUKOCYTE INTERFERON               | C0733470                     | 1.95E-04 | n/a              | 30                 | 14.9529528         | 212             |
| ASPIRIN                                  | C0004057                     | 8.12E-04 | n/a              | 29                 | 15.51721517        | 220             |
| IMMUNOLOGIC ADJUVANTS                    | C0001551                     | 1.09E-04 | n/a              | 28                 | 13.1191001         | 186             |
| HEPATITIS B SURFACE ANTIGENS             | C0019168                     | 2.69E-04 | n/a              | 28                 | 13.82442806        | 196             |
| UROKINASE                                | C0042071                     | 2.93E-04 | n/a              | 28                 | 13.89496086        | 197             |
| ALL TRANS RETINOL                        | C0087161                     | 1.48E-03 | n/a              | 28                 | 15.37614958        | 218             |
| ADRENAL CORTEX HORMONES                  | C0001617                     | 1.70E-03 | n/a              | 28                 | 15.51721517        | 220             |
| SERPINS                                  | C0036764                     | 5.56E-03 | n/a              | 28                 | 16.8573383         | 239             |
| HYALURONAN                               | C0813622                     | 3.74E-04 | n/a              | 27                 | 13.40123128        | 190             |
| CHLOROQUINE                              | C0008269                     | 1.42E-03 | n/a              | 27                 | 14.60028882        | 207             |
| PROSTAGLANDINS                           | C0033554                     | 3.87E-03 | n/a              | 27                 | 15.65828076        | 222             |
| ACETYL LDL                               | C0050486                     | 8.28E-08 | n/a              | 26                 | 8.111271566        | 115             |
| HYDROXYMETHYLGLUTARYL COA REDUCTASE INHI | C0360714                     | 1.25E-03 | n/a              | 26                 | 13.75389526        | 195             |
| VON WILLEBRAND FACTOR                    | C0042971                     | 1.58E-07 | n/a              | 25                 | 7.829140382        | 111             |
| SEPTA                                    | C0723285                     | 2.36E-04 | n/a              | 24                 | 11.00311621        | 156             |
| RECOMBINANT UROKINASE                    | C1522670                     | 4.19E-04 | n/a              | 24                 | 11.42631299        | 162             |
| PREDNISOLONE                             | C0032950                     | 5.37E-03 | n/a              | 24                 | 13.75389526        | 195             |
| CHONDROITIN SULFATES                     | C0008466                     | 6.10E-03 | n/a              | 24                 | 13.89496086        | 197             |

|                                           |          |          |     |    |             |     |
|-------------------------------------------|----------|----------|-----|----|-------------|-----|
| DEXTRAN SULFATE                           | C0079224 | 1.28E-05 | n/a | 22 | 8.04073877  | 114 |
| INTRAVENOUS IMMUNOGLOBULIN                | C0085297 | 2.96E-05 | n/a | 22 | 8.463935548 | 120 |
| MINOCYCLINE                               | C0026187 | 4.66E-04 | n/a | 22 | 10.15672266 | 144 |
| CPG ODN                                   | C0914671 | 9.83E-04 | n/a | 22 | 10.72098503 | 152 |
| RECOMBINANT ALPHA CHEMOKINE               | C1527035 | 3.57E-03 | n/a | 22 | 11.84950977 | 168 |
| ANGIOGENESIS INHIBITORS                   | C0596087 | 8.63E-03 | n/a | 22 | 12.76643612 | 181 |
| RECOMBINANT INTERFERON ALPHA INDUCIBLE PR | C1522712 | 5.06E-06 | n/a | 21 | 7.053279623 | 100 |
| CARRAGEENAN                               | C0007289 | 4.39E-04 | n/a | 21 | 9.451394695 | 134 |
| RITUXIMAB                                 | C0393022 | 1.15E-03 | n/a | 21 | 10.15672266 | 144 |
| SERINE PROTEINASE INHIBITORS              | C0036733 | 5.66E-03 | n/a | 21 | 11.56737858 | 164 |
| ENDOGLYCOSIDASES                          | C3537242 | 9.64E-03 | n/a | 21 | 12.13164095 | 172 |
| BUDESONIDE                                | C0054201 | 5.06E-05 | n/a | 20 | 7.547009197 | 107 |
| BETA GLUCANS                              | C1134651 | 9.87E-05 | n/a | 20 | 7.899673178 | 112 |
| POLY I C                                  | C0032414 | 1.23E-03 | n/a | 20 | 9.521927491 | 135 |
| RECOMBINANT MACROPHAGE COLONY STIMULAT    | C1524095 | 2.48E-03 | n/a | 20 | 10.08618986 | 143 |
| FACTOR XIII                               | C0015528 | 1.82E-05 | n/a | 19 | 6.489017253 | 92  |
| LIPOPEPTIDES                              | C2266975 | 2.50E-05 | n/a | 19 | 6.630082846 | 94  |
| BISPECIFIC ANTIBODY                       | C0206492 | 9.32E-05 | n/a | 19 | 7.264878012 | 103 |
| FUCOIDAN                                  | C0060794 | 1.43E-03 | n/a | 19 | 8.957665121 | 127 |
| IMIQUIMOD                                 | C0165032 | 1.43E-03 | n/a | 19 | 8.957665121 | 127 |
| HUMAN IMMUNOGLOBULIN A                    | C2825347 | 1.72E-03 | n/a | 19 | 9.098730714 | 129 |
| METHYLPREDNISOLONE                        | C0025815 | 2.26E-03 | n/a | 19 | 9.310329102 | 132 |
| BLOOD COAGULATION FACTOR                  | C0005789 | 4.76E-03 | n/a | 19 | 9.945124268 | 141 |
| PLASMINOGEN ACTIVATOR                     | C0032144 | 4.76E-03 | n/a | 19 | 9.945124268 | 141 |
| THERAPEUTIC TUMOR INFILTRATING LYMPHOCYTE | C1515408 | 5.99E-03 | n/a | 19 | 10.15672266 | 144 |
| PROTEIN KINASE C INHIBITOR                | C1514555 | 8.01E-03 | n/a | 19 | 10.43885384 | 148 |
| MANNANS                                   | C0024727 | 9.88E-05 | n/a | 18 | 6.700615642 | 95  |
| ULEX EUROPAEUS FLOWER EXTRACT             | C3486655 | 1.71E-04 | n/a | 18 | 6.982746827 | 99  |
| TETANUS TOXOID ADSORBED                   | C0305062 | 4.12E-04 | n/a | 18 | 7.4764764   | 106 |
| APROTININ                                 | C0003641 | 5.83E-04 | n/a | 18 | 7.688074789 | 109 |
| AMPHOTERICIN B                            | C0002679 | 7.28E-04 | n/a | 18 | 7.829140382 | 111 |
| TOLONIUM CHLORIDE                         | C0040380 | 9.03E-04 | n/a | 18 | 7.970205974 | 113 |
| EPOPROSTENOL                              | C0033567 | 1.66E-03 | n/a | 18 | 8.393402751 | 119 |
| METHACHOLINE                              | C0600370 | 3.16E-03 | n/a | 18 | 8.887132325 | 126 |
| MONOPHOSPHORYL LIPID A                    | C0066776 | 6.28E-06 | n/a | 17 | 5.007828532 | 71  |
| CYTOCHALASIN B                            | C0010737 | 4.04E-04 | n/a | 17 | 6.841681234 | 97  |
| VALSARTAN                                 | C0216784 | 9.22E-04 | n/a | 17 | 7.335410808 | 104 |
| TETANUS VACCINE                           | C0039620 | 1.15E-03 | n/a | 17 | 7.4764764   | 106 |
| MERBROMIN                                 | C0025397 | 1.42E-03 | n/a | 17 | 7.617541993 | 108 |
| IMMUNOTOXINS                              | C0021084 | 2.83E-03 | n/a | 17 | 8.111271566 | 115 |
| ANTIPLASMIN                               | C0003410 | 6.45E-06 | n/a | 16 | 4.514098959 | 64  |
| RICINUS COMMUNIS WHOLE EXTRACT            | C3537211 | 3.81E-05 | n/a | 16 | 5.148894125 | 73  |
| INDIUM BLEOMYCIN                          | C0063476 | 1.17E-03 | n/a | 16 | 6.841681234 | 97  |
| BICUCULLINE                               | C0005372 | 2.22E-03 | n/a | 16 | 7.264878012 | 103 |

|                                              |          |          |     |    |             |     |
|----------------------------------------------|----------|----------|-----|----|-------------|-----|
| TRYPTOPHAN                                   | C0041249 | 2.22E-03 | n/a | 16 | 7.264878012 | 103 |
| PROTEASE INHIBITORS                          | C0033607 | 2.72E-03 | n/a | 16 | 7.405943604 | 105 |
| HEPARIN SEPHAROSE                            | C0062515 | 6.20E-03 | n/a | 16 | 8.04073877  | 114 |
| PROSTAGLANDINS I                             | C0205911 | 7.32E-03 | n/a | 16 | 8.181804363 | 116 |
| FLUVASTATIN                                  | C0082608 | 8.61E-03 | n/a | 16 | 8.322869955 | 118 |
| GAMMA GLOBULIN SERUM                         | C0305052 | 1.79E-06 | n/a | 15 | 3.667705404 | 52  |
| HIRUDINS                                     | C1451270 | 2.35E-05 | n/a | 15 | 4.443566162 | 63  |
| HIRUDIN                                      | C0019573 | 2.35E-05 | n/a | 15 | 4.443566162 | 63  |
| OLIGOADENYLATE                               | C0133819 | 3.59E-04 | n/a | 15 | 5.572090902 | 79  |
| GLUCANS                                      | C0017696 | 9.13E-04 | n/a | 15 | 6.065820476 | 86  |
| CHOLIC ACID                                  | C0055568 | 1.31E-03 | n/a | 15 | 6.277418864 | 89  |
| CHOLIC ACIDS                                 | C0008404 | 1.31E-03 | n/a | 15 | 6.277418864 | 89  |
| INFLIXIMAB                                   | C0666743 | 4.23E-03 | n/a | 15 | 7.053279623 | 100 |
| LOSARTAN                                     | C0126174 | 5.11E-03 | n/a | 15 | 7.194345215 | 102 |
| CARDIAC GLYCOSIDES                           | C0007158 | 7.98E-03 | n/a | 15 | 7.547009197 | 107 |
| OXALATE                                      | C3669135 | 9.43E-03 | n/a | 15 | 7.688074789 | 109 |
| BCG VACCINE                                  | C0004886 | 9.43E-03 | n/a | 15 | 7.688074789 | 109 |
| CHONDROITIN 4 SULFATE                        | C0086008 | 5.80E-04 | n/a | 14 | 5.219426921 | 74  |
| LOW MOLECULAR WEIGHT HEPARIN                 | C0019139 | 1.14E-03 | n/a | 14 | 5.572090902 | 79  |
| ADENOSINE TRIPHOSPHATE                       | C0001480 | 1.86E-03 | n/a | 14 | 5.854222087 | 83  |
| RECOMBINANT IMMUNE GLOBULIN                  | C1527233 | 2.09E-03 | n/a | 14 | 5.924754883 | 84  |
| FIBRATES                                     | C1449704 | 4.93E-03 | n/a | 14 | 6.489017253 | 92  |
| MANNITOL                                     | C0024730 | 9.44E-03 | n/a | 14 | 6.982746827 | 99  |
| MEASLES VACCINE                              | C0025010 | 1.97E-06 | n/a | 13 | 2.821311849 | 40  |
| CEFTAZIDIME                                  | C0007559 | 4.71E-05 | n/a | 13 | 3.667705404 | 52  |
| FACTOR VII                                   | C0015502 | 1.24E-03 | n/a | 13 | 5.007828532 | 71  |
| ALLOPURINOL                                  | C0002144 | 2.65E-03 | n/a | 13 | 5.43102531  | 77  |
| CYSTEINYL LEUKOTRIENE                        | C0675175 | 3.34E-03 | n/a | 13 | 5.572090902 | 79  |
| OLMESARTAN                                   | C1098320 | 4.17E-03 | n/a | 13 | 5.713156495 | 81  |
| ARECOLINE                                    | C0003753 | 4.65E-03 | n/a | 13 | 5.783689291 | 82  |
| PARAFORM                                     | C0070066 | 5.17E-03 | n/a | 13 | 5.854222087 | 83  |
| PITAVASTATIN                                 | C1101838 | 8.48E-03 | n/a | 13 | 6.206886068 | 88  |
| PLASMIN INHIBITOR                            | C0032139 | 9.17E-05 | n/a | 12 | 3.385574219 | 48  |
| HLA DR ALPHA CHAINS                          | C0019763 | 1.14E-04 | n/a | 12 | 3.456107015 | 49  |
| THERAPEUTIC CORYNEBACTERIUM PARVUM           | C1522468 | 5.17E-04 | n/a | 12 | 4.020369385 | 57  |
| DILTIAZEM                                    | C0012373 | 6.11E-04 | n/a | 12 | 4.090902181 | 58  |
| COMPLEMENT INACTIVATING AGENTS               | C1564892 | 7.19E-04 | n/a | 12 | 4.161434978 | 59  |
| SODIUM SULFIDE                               | C0074770 | 1.52E-03 | n/a | 12 | 4.514098959 | 64  |
| MITOMYCINS                                   | C0026254 | 2.61E-03 | n/a | 12 | 4.796230144 | 68  |
| DIGOXIN                                      | C0012265 | 2.96E-03 | n/a | 12 | 4.86676294  | 69  |
| POLYMYXIN B                                  | C0032535 | 3.77E-03 | n/a | 12 | 5.007828532 | 71  |
| CYSTEINE PROTEINASE INHIBITORS               | C0010658 | 3.77E-03 | n/a | 12 | 5.007828532 | 71  |
| ETANERCEPT                                   | C0717758 | 7.36E-03 | n/a | 12 | 5.43102531  | 77  |
| BACTERICIDAL PERMEABILITY INCREASING PROTEIN | C0052897 | 2.22E-04 | n/a | 11 | 3.17397583  | 45  |

|                                         |          |          |     |    |             |    |
|-----------------------------------------|----------|----------|-----|----|-------------|----|
| ALLERGENIC EXTRACT                      | C0440016 | 3.35E-04 | n/a | 11 | 3.315041423 | 47 |
| FACTOR VIIA                             | C0015505 | 7.06E-04 | n/a | 11 | 3.597172608 | 51 |
| PIROXICAM                               | C0031990 | 9.93E-04 | n/a | 11 | 3.7382382   | 53 |
| AMD 3100                                | C0662900 | 1.37E-03 | n/a | 11 | 3.879303793 | 55 |
| OK 432                                  | C0918027 | 1.37E-03 | n/a | 11 | 3.879303793 | 55 |
| RECOMBINANT INTERLEUKIN 4               | C1522540 | 1.60E-03 | n/a | 11 | 3.949836589 | 56 |
| HYPOLIPIDEMIC AGENTS                    | C0086440 | 2.15E-03 | n/a | 11 | 4.090902181 | 58 |
| CERIVASTATIN                            | C0528023 | 2.15E-03 | n/a | 11 | 4.090902181 | 58 |
| CURDLAN                                 | C0056608 | 2.15E-03 | n/a | 11 | 4.090902181 | 58 |
| 4 BETA AMINOETHYLBENZOLSULFOFLUORIDE    | C0047895 | 2.84E-03 | n/a | 11 | 4.231967774 | 60 |
| THROMBIN INHIBITORS                     | C2746042 | 3.25E-03 | n/a | 11 | 4.30250057  | 61 |
| LIPASE                                  | C0023764 | 3.25E-03 | n/a | 11 | 4.30250057  | 61 |
| 7 AMINOACTINOMYCIN D                    | C0049832 | 3.25E-03 | n/a | 11 | 4.30250057  | 61 |
| LEVAMISOLE                              | C0023556 | 4.21E-03 | n/a | 11 | 4.443566162 | 63 |
| ITRACONAZOLE                            | C0064113 | 4.21E-03 | n/a | 11 | 4.443566162 | 63 |
| BEXAROTENE                              | C0765273 | 4.77E-03 | n/a | 11 | 4.514098959 | 64 |
| DESOXYCORTICOSTERONE ACETATE            | C0813203 | 4.77E-03 | n/a | 11 | 4.514098959 | 64 |
| PRISTANE                                | C0071986 | 6.80E-03 | n/a | 11 | 4.725697347 | 67 |
| VANILLOID                               | C1519952 | 8.50E-03 | n/a | 11 | 4.86676294  | 69 |
| MEDICATED                               | C3812869 | 9.46E-03 | n/a | 11 | 4.937295736 | 70 |
| ACETYLMURAMYL ALANYL ISOGLUTAMINE       | C0001060 | 9.46E-03 | n/a | 11 | 4.937295736 | 70 |
| MURAMIDASE                              | C0026794 | 3.57E-06 | n/a | 10 | 1.763319906 | 25 |
| CONJUGATE VACCINE                       | C0206515 | 1.75E-04 | n/a | 10 | 2.609713461 | 37 |
| PURINERGIC P1 RECEPTOR AGONISTS         | C2917322 | 2.22E-04 | n/a | 10 | 2.680246257 | 38 |
| PHOSPHORAMIDON                          | C0070915 | 6.54E-04 | n/a | 10 | 3.032910238 | 43 |
| FIBRIN TISSUE ADHESIVE                  | C0016004 | 7.94E-04 | n/a | 10 | 3.103443034 | 44 |
| ABATACEPT                               | C1619966 | 1.37E-03 | n/a | 10 | 3.315041423 | 47 |
| THIOPENTAL                              | C0039925 | 1.91E-03 | n/a | 10 | 3.456107015 | 49 |
| COMPOUND 48 80                          | C0009574 | 1.91E-03 | n/a | 10 | 3.456107015 | 49 |
| RECOMBINANT GRANULOCYTE COLONY STIMULAT | C0376562 | 2.24E-03 | n/a | 10 | 3.526639812 | 50 |
| HUMAN IMMUNOGLOBULIN G                  | C2702333 | 2.61E-03 | n/a | 10 | 3.597172608 | 51 |
| INTERFERON TYPE II                      | C0021745 | 3.50E-03 | n/a | 10 | 3.7382382   | 53 |
| CHONDROITIN 6 SULFATE                   | C0086009 | 4.04E-03 | n/a | 10 | 3.808770996 | 54 |
| ACYCLOVIR                               | C0001367 | 4.63E-03 | n/a | 10 | 3.879303793 | 55 |
| ATENOLOL                                | C0004147 | 4.63E-03 | n/a | 10 | 3.879303793 | 55 |
| EGG LYSOZYME                            | C4040986 | 6.83E-03 | n/a | 10 | 4.090902181 | 58 |
| CLOTRIMAZOLE                            | C0009074 | 7.71E-03 | n/a | 10 | 4.161434978 | 59 |
| CYTOTOXIC AGENT                         | C0304497 | 9.75E-03 | n/a | 10 | 4.30250057  | 61 |
| SODIUM HYALURONATE                      | C0087000 | 2.07E-05 | n/a | 9  | 1.69278711  | 24 |
| HUMAN THROMBIN                          | C2369149 | 2.65E-04 | n/a | 9  | 2.257049479 | 32 |
| ANTI ASTHMATIC AGENTS                   | C0282556 | 3.42E-04 | n/a | 9  | 2.327582276 | 33 |
| COAGULATION PROTEIN                     | C1292266 | 4.36E-04 | n/a | 9  | 2.398115072 | 34 |
| OLOPATADINE                             | C0527189 | 5.51E-04 | n/a | 9  | 2.468647868 | 35 |
| VITAMIN K 1                             | C0031862 | 6.89E-04 | n/a | 9  | 2.539180664 | 36 |

|                                         |          |          |     |   |             |    |
|-----------------------------------------|----------|----------|-----|---|-------------|----|
| CEFOTAXIME                              | C0007554 | 6.89E-04 | n/a | 9 | 2.539180664 | 36 |
| IMMUNOL                                 | C1517844 | 6.89E-04 | n/a | 9 | 2.539180664 | 36 |
| PHENOXYBENZAMINE                        | C0031441 | 1.28E-03 | n/a | 9 | 2.750779053 | 39 |
| FIBRINOGEN HUMAN PLASMA DERIVED         | C2587184 | 1.55E-03 | n/a | 9 | 2.821311849 | 40 |
| MILTEFOSINE                             | C0068006 | 1.55E-03 | n/a | 9 | 2.821311849 | 40 |
| ANTIFIBRINOLYTIC AGENTS                 | C0003304 | 1.87E-03 | n/a | 9 | 2.891844645 | 41 |
| CASTANOSPERMINE                         | C0054849 | 2.23E-03 | n/a | 9 | 2.962377442 | 42 |
| KAOLIN                                  | C0022499 | 2.23E-03 | n/a | 9 | 2.962377442 | 42 |
| ALTEPLASE                               | C0032143 | 3.67E-03 | n/a | 9 | 3.17397583  | 45 |
| ELASTASE INHIBITOR                      | C0596481 | 4.28E-03 | n/a | 9 | 3.244508627 | 46 |
| ETOMIDATE                               | C0015131 | 4.97E-03 | n/a | 9 | 3.315041423 | 47 |
| SEPRANOLONE                             | C0376202 | 6.60E-03 | n/a | 9 | 3.456107015 | 49 |
| GW9662                                  | C1137010 | 9.79E-03 | n/a | 9 | 3.667705404 | 52 |
| ALUMINUM HYDROXIDE                      | C0002371 | 9.79E-03 | n/a | 9 | 3.667705404 | 52 |
| S 27609                                 | C0381150 | 8.14E-06 | n/a | 8 | 1.199057536 | 17 |
| ACECLOFENAC                             | C0050403 | 2.23E-05 | n/a | 8 | 1.340123128 | 19 |
| DEFIBROTIDE                             | C0057257 | 3.48E-05 | n/a | 8 | 1.410655925 | 20 |
| ARGATROBAN                              | C0048470 | 1.12E-04 | n/a | 8 | 1.622254313 | 23 |
| RECOMBINANT FVIIA                       | C0534191 | 5.18E-04 | n/a | 8 | 1.974918294 | 28 |
| 3',5' DICHLOROMETHOTREXATE              | C0046764 | 6.71E-04 | n/a | 8 | 2.045451091 | 29 |
| LEPIRUDIN                               | C0772394 | 8.59E-04 | n/a | 8 | 2.115983887 | 30 |
| PHOSPHOLIPASE A2 INHIBITORS             | C3658209 | 1.09E-03 | n/a | 8 | 2.186516683 | 31 |
| SERPIN SUPERFAMILY                      | C0036763 | 1.36E-03 | n/a | 8 | 2.257049479 | 32 |
| REPAGLINIDE                             | C0246689 | 1.36E-03 | n/a | 8 | 2.257049479 | 32 |
| PRANLUKAST                              | C0526058 | 1.36E-03 | n/a | 8 | 2.257049479 | 32 |
| FEBUXOSTAT                              | C0249529 | 2.52E-03 | n/a | 8 | 2.468647868 | 35 |
| RECOMBINANT INTERFERON BETA 1A          | C0982234 | 2.52E-03 | n/a | 8 | 2.468647868 | 35 |
| ANGIOTENSIN II TYPE 1 RECEPTOR BLOCKERS | C1449680 | 2.52E-03 | n/a | 8 | 2.468647868 | 35 |
| MINERALOCORTICOID RECEPTOR ANTAGONISTS  | C1579268 | 3.05E-03 | n/a | 8 | 2.539180664 | 36 |
| HLA DR BETA AG                          | C0019765 | 3.05E-03 | n/a | 8 | 2.539180664 | 36 |
| SODIUM DODECYL SULFATE                  | C0037506 | 3.65E-03 | n/a | 8 | 2.609713461 | 37 |
| LUXOL FAST BLUE MBS                     | C0065274 | 3.65E-03 | n/a | 8 | 2.609713461 | 37 |
| PLATELET CONCENTRATE                    | C2362067 | 5.14E-03 | n/a | 8 | 2.750779053 | 39 |
| RECOMBINANT INTERFERON GAMMA            | C0021740 | 8.18E-03 | n/a | 8 | 2.962377442 | 42 |
| CUPRAMMONIUM CELLULOSE                  | C0056591 | 9.44E-03 | n/a | 8 | 3.032910238 | 43 |
| DIPHENHYDRAMINE                         | C0012522 | 9.44E-03 | n/a | 8 | 3.032910238 | 43 |
| HUMAN IMMUNOGLOBULIN M                  | C2825348 | 9.44E-03 | n/a | 8 | 3.032910238 | 43 |
| TOBRAMYCIN                              | C0040341 | 9.44E-03 | n/a | 8 | 3.032910238 | 43 |
| CEFUROXIME                              | C0007562 | 5.52E-05 | n/a | 7 | 1.12852474  | 16 |
| ANTIDIARRHEALS                          | C0003292 | 5.52E-05 | n/a | 7 | 1.12852474  | 16 |
| HEMATOPORPHYRIN                         | C0018959 | 1.35E-04 | n/a | 7 | 1.269590332 | 18 |
| 9 AMINOCAMPTOTHECIN                     | C0214192 | 2.01E-04 | n/a | 7 | 1.340123128 | 19 |
| 3 HYDROXYKYNURENINE                     | C0047472 | 4.10E-04 | n/a | 7 | 1.481188721 | 21 |
| KH 1060                                 | C0167620 | 4.10E-04 | n/a | 7 | 1.481188721 | 21 |

|                                            |          |          |     |   |             |    |
|--------------------------------------------|----------|----------|-----|---|-------------|----|
| CHYMOPAPAIN                                | C0008736 | 1.32E-03 | n/a | 7 | 1.763319906 | 25 |
| SYNTHETIC ANTIGENS                         | C0039115 | 2.16E-03 | n/a | 7 | 1.904385498 | 27 |
| IMMUNOGLOBULIN G                           | C0020852 | 2.16E-03 | n/a | 7 | 1.904385498 | 27 |
| KREBS RINGER SOLUTION                      | C0064411 | 2.71E-03 | n/a | 7 | 1.974918294 | 28 |
| IRON DEXTRAN COMPLEX                       | C0022092 | 3.35E-03 | n/a | 7 | 2.045451091 | 29 |
| DISUCCINIMIDYL SUBERATE                    | C0058479 | 3.35E-03 | n/a | 7 | 2.045451091 | 29 |
| PHOSPHOLIPASE A2 INHIBITOR                 | C0893636 | 4.11E-03 | n/a | 7 | 2.115983887 | 30 |
| BIRB 796                                   | C1121746 | 4.99E-03 | n/a | 7 | 2.186516683 | 31 |
| TOLEROGEN                                  | C0076797 | 4.99E-03 | n/a | 7 | 2.186516683 | 31 |
| TAPI 2                                     | C0389500 | 6.01E-03 | n/a | 7 | 2.257049479 | 32 |
| BECLOMETHASONE                             | C0004905 | 6.01E-03 | n/a | 7 | 2.257049479 | 32 |
| INTERFERON BETA 1A                         | C0254119 | 7.18E-03 | n/a | 7 | 2.327582276 | 33 |
| PROLACTIN RELEASING HORMONE                | C0033374 | 7.18E-03 | n/a | 7 | 2.327582276 | 33 |
| CASPOFUNGIN                                | C0537894 | 8.50E-03 | n/a | 7 | 2.398115072 | 34 |
| CETRORELIX                                 | C0209366 | 8.50E-03 | n/a | 7 | 2.398115072 | 34 |
| LINAGLIPTIN                                | C2746078 | 9.99E-03 | n/a | 7 | 2.468647868 | 35 |
| RECOMBINANT INTERLEUKIN 8                  | C1527432 | 9.99E-03 | n/a | 7 | 2.468647868 | 35 |
| FREE RETINOL                               | C3873611 | 1.99E-05 | n/a | 6 | 0.705327962 | 10 |
| EOSINOPHIL DERIVED NEUROTOXIN              | C0059409 | 1.35E-04 | n/a | 6 | 0.916926351 | 13 |
| THROMBIN                                   | C0040018 | 2.22E-04 | n/a | 6 | 0.987459147 | 14 |
| RP 73401                                   | C0295452 | 3.48E-04 | n/a | 6 | 1.057991943 | 15 |
| EZN 2208                                   | C2347621 | 3.48E-04 | n/a | 6 | 1.057991943 | 15 |
| SR 11237                                   | C0254507 | 1.08E-03 | n/a | 6 | 1.269590332 | 18 |
| METRIZAMIDE                                | C0025869 | 1.48E-03 | n/a | 6 | 1.340123128 | 19 |
| LACTATED RINGER'S SOLUTION                 | C0073385 | 1.48E-03 | n/a | 6 | 1.340123128 | 19 |
| LANTHANUM CARBONATE                        | C0768119 | 1.48E-03 | n/a | 6 | 1.340123128 | 19 |
| SINGLE CHAIN UROKINASE TYPE PLASMINOGEN AC | C0086987 | 1.99E-03 | n/a | 6 | 1.410655925 | 20 |
| BOVINE THROMBIN                            | C1337342 | 1.99E-03 | n/a | 6 | 1.410655925 | 20 |
| IXAZOMIB                                   | C3273711 | 2.62E-03 | n/a | 6 | 1.481188721 | 21 |
| ANTITHROMBINS                              | C0003440 | 2.62E-03 | n/a | 6 | 1.481188721 | 21 |
| SUPLATAST TOSILATE                         | C0527067 | 2.62E-03 | n/a | 6 | 1.481188721 | 21 |
| BRIVANIB ALANINATE                         | C1948076 | 3.39E-03 | n/a | 6 | 1.551721517 | 22 |
| NORGESTREL                                 | C0028368 | 4.32E-03 | n/a | 6 | 1.622254313 | 23 |
| PHENYLALANYL LEUCYL PHENYLALANYL GLUTAMINE | C0070651 | 5.42E-03 | n/a | 6 | 1.69278711  | 24 |
| REACTIVE BLUE 2                            | C0140012 | 5.42E-03 | n/a | 6 | 1.69278711  | 24 |
| TOUCHDOWN                                  | C0912256 | 5.42E-03 | n/a | 6 | 1.69278711  | 24 |
| TENIDAP                                    | C0076092 | 6.71E-03 | n/a | 6 | 1.763319906 | 25 |
| RIVASTIGMINE                               | C0649350 | 6.71E-03 | n/a | 6 | 1.763319906 | 25 |
| MRS 2179                                   | C0674169 | 6.71E-03 | n/a | 6 | 1.763319906 | 25 |
| HIV VACCINE                                | C0086413 | 8.21E-03 | n/a | 6 | 1.833852702 | 26 |
| RESIQUIMOD                                 | C0965594 | 8.21E-03 | n/a | 6 | 1.833852702 | 26 |
| HYDROETHIDINE                              | C0063082 | 9.94E-03 | n/a | 6 | 1.904385498 | 27 |
| PARECOXIB SODIUM                           | C0915144 | 9.94E-03 | n/a | 6 | 1.904385498 | 27 |
| HUMAN IMMUNOGLOBULIN PRODUCT               | C0358321 | 9.94E-03 | n/a | 6 | 1.904385498 | 27 |

|                                              |          |          |     |   |             |    |
|----------------------------------------------|----------|----------|-----|---|-------------|----|
| BILE ACID SEQUESTRANTS                       | C2917337 | 9.94E-03 | n/a | 6 | 1.904385498 | 27 |
| BRIMONIDINE                                  | C0525227 | 9.94E-03 | n/a | 6 | 1.904385498 | 27 |
| RUBITECAN                                    | C0213800 | 9.94E-03 | n/a | 6 | 1.904385498 | 27 |
| ORAL ANTICOAGULANTS                          | C0354604 | 9.94E-03 | n/a | 6 | 1.904385498 | 27 |
| 2' FUCOSYLLACTOSE                            | C0045214 | 3.23E-04 | n/a | 5 | 0.705327962 | 10 |
| ANTISTASIN                                   | C0052098 | 5.57E-04 | n/a | 5 | 0.775860759 | 11 |
| TOLMETIN                                     | C0040377 | 5.57E-04 | n/a | 5 | 0.775860759 | 11 |
| DG172                                        | C3493533 | 8.99E-04 | n/a | 5 | 0.846393555 | 12 |
| ACID CYSTEINE PROTEINASE INHIBITORS          | C0001097 | 8.99E-04 | n/a | 5 | 0.846393555 | 12 |
| BC8                                          | C2987608 | 1.38E-03 | n/a | 5 | 0.916926351 | 13 |
| ZINC SALTS                                   | C0351669 | 1.38E-03 | n/a | 5 | 0.916926351 | 13 |
| E 7010                                       | C0656781 | 1.38E-03 | n/a | 5 | 0.916926351 | 13 |
| ZARDAVERINE                                  | C0085049 | 2.02E-03 | n/a | 5 | 0.987459147 | 14 |
| BIOBRAN                                      | C1527110 | 2.02E-03 | n/a | 5 | 0.987459147 | 14 |
| PLECONARIL                                   | C0759032 | 2.02E-03 | n/a | 5 | 0.987459147 | 14 |
| DIRECT FACTOR XA INHIBITORS                  | C3653500 | 2.02E-03 | n/a | 5 | 0.987459147 | 14 |
| FACTOR VIII                                  | C0015506 | 2.02E-03 | n/a | 5 | 0.987459147 | 14 |
| TRASLYOL                                     | C0592198 | 2.85E-03 | n/a | 5 | 1.057991943 | 15 |
| CUROSURF                                     | C0111318 | 2.85E-03 | n/a | 5 | 1.057991943 | 15 |
| HUMAN INTRAVENOUS IMMUNOGLOBULINS            | C3494178 | 2.85E-03 | n/a | 5 | 1.057991943 | 15 |
| COD LIVER OIL                                | C0009213 | 3.91E-03 | n/a | 5 | 1.12852474  | 16 |
| CANAKINUMAB                                  | C2718773 | 3.91E-03 | n/a | 5 | 1.12852474  | 16 |
| S 28463                                      | C0389573 | 3.91E-03 | n/a | 5 | 1.12852474  | 16 |
| INGENOL                                      | C0063537 | 3.91E-03 | n/a | 5 | 1.12852474  | 16 |
| OKY 046                                      | C0133777 | 3.91E-03 | n/a | 5 | 1.12852474  | 16 |
| 7 NITROBENZ 2 OXA 1,3 DIAZOL 4 YLCHOLESTEROL | C0174000 | 3.91E-03 | n/a | 5 | 1.12852474  | 16 |
| TRIFLURIDINE                                 | C0040987 | 3.91E-03 | n/a | 5 | 1.12852474  | 16 |
| COMPSTATIN                                   | C0673968 | 5.23E-03 | n/a | 5 | 1.199057536 | 17 |
| ANTI TUMOR NECROSIS FACTOR ALPHA DRUG        | C1562242 | 5.23E-03 | n/a | 5 | 1.199057536 | 17 |
| PROTHROMBIN COMPLEX                          | C3541956 | 5.23E-03 | n/a | 5 | 1.199057536 | 17 |
| POLY ICLC                                    | C0071359 | 6.82E-03 | n/a | 5 | 1.269590332 | 18 |
| PITAVASTATIN CALCIUM                         | C2720023 | 6.82E-03 | n/a | 5 | 1.269590332 | 18 |
| DIRECT THROMBIN INHIBITORS                   | C3541936 | 6.82E-03 | n/a | 5 | 1.269590332 | 18 |
| CORD FACTORS                                 | C0010004 | 6.82E-03 | n/a | 5 | 1.269590332 | 18 |
| CALCIUM                                      | C0006675 | 6.82E-03 | n/a | 5 | 1.269590332 | 18 |
| ACYCLIC RETINOID                             | C0101406 | 8.73E-03 | n/a | 5 | 1.340123128 | 19 |
| RYE GRASS                                    | C4049835 | 8.73E-03 | n/a | 5 | 1.340123128 | 19 |
| ZOFENOPRILATE                                | C0085065 | 8.73E-03 | n/a | 5 | 1.340123128 | 19 |
| COAGULATION FACTOR VIIIC                     | C1307126 | 1.14E-04 | n/a | 4 | 0.352663981 | 5  |
| CI 1044                                      | C0963191 | 3.29E-04 | n/a | 4 | 0.423196777 | 6  |
| VTX 294                                      | C3713619 | 3.29E-04 | n/a | 4 | 0.423196777 | 6  |
| TISSUE FACTOR PATHWAY INHIBITOR              | C0164707 | 7.23E-04 | n/a | 4 | 0.493729574 | 7  |
| HIRULOG 1                                    | C0950817 | 7.23E-04 | n/a | 4 | 0.493729574 | 7  |
| ZHANKUIC ACID A                              | C0387325 | 7.23E-04 | n/a | 4 | 0.493729574 | 7  |

|                                             |          |          |     |   |             |    |
|---------------------------------------------|----------|----------|-----|---|-------------|----|
| CROFELEMER                                  | C2744960 | 7.23E-04 | n/a | 4 | 0.493729574 | 7  |
| 3,3',4',5 TETRACHLOROSALICYLANILIDE         | C0046874 | 1.36E-03 | n/a | 4 | 0.56426237  | 8  |
| AGNUSIDE                                    | C1122015 | 1.36E-03 | n/a | 4 | 0.56426237  | 8  |
| ALOSETRON HYDROCHLORIDE                     | C0291771 | 1.36E-03 | n/a | 4 | 0.56426237  | 8  |
| DESIRUDIN                                   | C0378366 | 1.36E-03 | n/a | 4 | 0.56426237  | 8  |
| METHYLENE DIPHOSPHONATE                     | C0066351 | 1.36E-03 | n/a | 4 | 0.56426237  | 8  |
| PROXIGERMANIUM                              | C0081913 | 2.32E-03 | n/a | 4 | 0.634795166 | 9  |
| TRIAZOLODIAZEPINE                           | C0245118 | 2.32E-03 | n/a | 4 | 0.634795166 | 9  |
| TRIAZOLE ANTIFUNGAL                         | C0360380 | 2.32E-03 | n/a | 4 | 0.634795166 | 9  |
| HLA G ANTIGEN                               | C0082920 | 2.32E-03 | n/a | 4 | 0.634795166 | 9  |
| SUBCUTANEOUS HEPARIN                        | C0353681 | 2.32E-03 | n/a | 4 | 0.634795166 | 9  |
| GINSENOSIDE RB2                             | C0061271 | 2.32E-03 | n/a | 4 | 0.634795166 | 9  |
| ONO 4007                                    | C0254026 | 3.66E-03 | n/a | 4 | 0.705327962 | 10 |
| DEAE SEPHADEX A 50                          | C0057215 | 3.66E-03 | n/a | 4 | 0.705327962 | 10 |
| BN 50730                                    | C0081833 | 5.43E-03 | n/a | 4 | 0.775860759 | 11 |
| MONOCLONAL ANTIBODY LL2                     | C0281743 | 5.43E-03 | n/a | 4 | 0.775860759 | 11 |
| PYRILAMINE MALEATE                          | C0282330 | 5.43E-03 | n/a | 4 | 0.775860759 | 11 |
| BETA AMINOETHYLISOTHIURONIUM DIHYDROBRO     | C0001716 | 5.43E-03 | n/a | 4 | 0.775860759 | 11 |
| BAY X 1005                                  | C0656891 | 5.43E-03 | n/a | 4 | 0.775860759 | 11 |
| BENRALIZUMAB                                | C2982078 | 5.43E-03 | n/a | 4 | 0.775860759 | 11 |
| ASPERGILLUS FUMIGATUS EXTRACT               | C1445421 | 5.43E-03 | n/a | 4 | 0.775860759 | 11 |
| NADROPARIN                                  | C0206232 | 7.69E-03 | n/a | 4 | 0.846393555 | 12 |
| MCC 555                                     | C0758974 | 7.69E-03 | n/a | 4 | 0.846393555 | 12 |
| MZM                                         | C0721501 | 7.69E-03 | n/a | 4 | 0.846393555 | 12 |
| TJ 9                                        | C1138012 | 7.69E-03 | n/a | 4 | 0.846393555 | 12 |
| SC 41930                                    | C0074112 | 7.69E-03 | n/a | 4 | 0.846393555 | 12 |
| THROMBIN ALFA                               | C2240523 | 7.69E-03 | n/a | 4 | 0.846393555 | 12 |
| FONTANA MASSON STAIN                        | C0060631 | 7.69E-03 | n/a | 4 | 0.846393555 | 12 |
| LITHOCHOLATE                                | C0086564 | 7.69E-03 | n/a | 4 | 0.846393555 | 12 |
| IRDYE 800CW                                 | C3254109 | 7.69E-03 | n/a | 4 | 0.846393555 | 12 |
| E5564                                       | C0912379 | 7.69E-03 | n/a | 4 | 0.846393555 | 12 |
| Z 100                                       | C0149256 | 7.69E-03 | n/a | 4 | 0.846393555 | 12 |
| 5' DEOXY 5 FLUOROCYTIDINE                   | C0963263 | 3.50E-04 | n/a | 3 | 0.211598389 | 3  |
| NSC 640488                                  | C0165764 | 3.50E-04 | n/a | 3 | 0.211598389 | 3  |
| HOMATROPINE                                 | C0062922 | 3.50E-04 | n/a | 3 | 0.211598389 | 3  |
| EPOXICONAZOLE                               | C0668753 | 1.30E-03 | n/a | 3 | 0.282131185 | 4  |
| 5 CHLORO 2 METHYL 4 ISOTHAZOLIN 3 ONE       | C0049104 | 1.30E-03 | n/a | 3 | 0.282131185 | 4  |
| RS 504393                                   | C3657798 | 1.30E-03 | n/a | 3 | 0.282131185 | 4  |
| DIPHThERIA TETANUS ACELLULAR PERTUSSIS VACC | C0535644 | 1.30E-03 | n/a | 3 | 0.282131185 | 4  |
| L 652731                                    | C0124915 | 1.30E-03 | n/a | 3 | 0.282131185 | 4  |
| INOSINIC ACID                               | C0021544 | 3.14E-03 | n/a | 3 | 0.352663981 | 5  |
| ALPIDEM                                     | C0051484 | 3.14E-03 | n/a | 3 | 0.352663981 | 5  |
| MONOCLONAL ANTIBODY HEFI 1                  | C0796480 | 3.14E-03 | n/a | 3 | 0.352663981 | 5  |
| BOVINE SEMINAL RIBONUCLEASE                 | C0106964 | 3.14E-03 | n/a | 3 | 0.352663981 | 5  |



|                                            |          |          |     |   |             |   |
|--------------------------------------------|----------|----------|-----|---|-------------|---|
| F 4614                                     | C0384949 | 3.14E-03 | n/a | 3 | 0.352663981 | 5 |
| LEUKADHERIN 1                              | C3851799 | 3.14E-03 | n/a | 3 | 0.352663981 | 5 |
| HAES STERIL                                | C0591584 | 3.14E-03 | n/a | 3 | 0.352663981 | 5 |
| ROXIFIBAN ACETATE                          | C3501644 | 3.14E-03 | n/a | 3 | 0.352663981 | 5 |
| MENINGITIS VACCINE                         | C0361275 | 3.14E-03 | n/a | 3 | 0.352663981 | 5 |
| RINTATOLIMOD                               | C1434913 | 3.14E-03 | n/a | 3 | 0.352663981 | 5 |
| AMPHOTERICIN B DEOXYCHOLATE                | C0051761 | 3.14E-03 | n/a | 3 | 0.352663981 | 5 |
| EXAMETAZIME                                | C0175035 | 3.14E-03 | n/a | 3 | 0.352663981 | 5 |
| FOSCAN                                     | C0701505 | 3.14E-03 | n/a | 3 | 0.352663981 | 5 |
| MOEXIPRILAT                                | C0209137 | 5.94E-03 | n/a | 3 | 0.423196777 | 6 |
| GS 9620                                    | C3658665 | 5.94E-03 | n/a | 3 | 0.423196777 | 6 |
| PHLOGENZYM                                 | C0769132 | 5.94E-03 | n/a | 3 | 0.423196777 | 6 |
| BENZYLOXYCARBONYLPHENYLALANYLPHENYLALANINE | C0053319 | 5.94E-03 | n/a | 3 | 0.423196777 | 6 |
| TIAPROFENIC ACID                           | C0076653 | 5.94E-03 | n/a | 3 | 0.423196777 | 6 |
| GI 129471                                  | C0257713 | 5.94E-03 | n/a | 3 | 0.423196777 | 6 |
| CITRATE PHOSPHATE DEXTROSE                 | C0055816 | 5.94E-03 | n/a | 3 | 0.423196777 | 6 |
| WORMWOOD EXTRACT                           | C1095890 | 5.94E-03 | n/a | 3 | 0.423196777 | 6 |
| BRL 50481                                  | C1566895 | 5.94E-03 | n/a | 3 | 0.423196777 | 6 |
| ARP 100                                    | C3714018 | 5.94E-03 | n/a | 3 | 0.423196777 | 6 |
| BL1521                                     | C1528435 | 5.94E-03 | n/a | 3 | 0.423196777 | 6 |
| 3 HYDROXYPYRIDIN 4 ONE                     | C0908483 | 5.94E-03 | n/a | 3 | 0.423196777 | 6 |
| HAEMACCEL                                  | C0918273 | 5.94E-03 | n/a | 3 | 0.423196777 | 6 |
| TECHNETIUM TC 99M PENTETATE                | C0080212 | 5.94E-03 | n/a | 3 | 0.423196777 | 6 |
| ST 1571                                    | C1097576 | 5.94E-03 | n/a | 3 | 0.423196777 | 6 |
| 1 FURAN 2 YL 3 PYRIDIN 2 YL PROPENONE      | C1700549 | 5.94E-03 | n/a | 3 | 0.423196777 | 6 |
| 2 AZETIDINONE                              | C0761491 | 9.87E-03 | n/a | 3 | 0.493729574 | 7 |
| BEMIPARIN                                  | C0916062 | 9.87E-03 | n/a | 3 | 0.493729574 | 7 |
| B 428                                      | C0754251 | 9.87E-03 | n/a | 3 | 0.493729574 | 7 |
| KD IX 73 4                                 | C0388970 | 9.87E-03 | n/a | 3 | 0.493729574 | 7 |
| ALVEOFAC                                   | C0210638 | 9.87E-03 | n/a | 3 | 0.493729574 | 7 |
| POLYSORBATES                               | C0032602 | 9.87E-03 | n/a | 3 | 0.493729574 | 7 |
| CAELYX                                     | C0701183 | 9.87E-03 | n/a | 3 | 0.493729574 | 7 |
| MUR NAC L ALA D ISOGLN                     | C0086659 | 9.87E-03 | n/a | 3 | 0.493729574 | 7 |
| SYNTHETIC COPOLYMER                        | C1268899 | 9.87E-03 | n/a | 3 | 0.493729574 | 7 |
| ACTARIT                                    | C0378042 | 9.87E-03 | n/a | 3 | 0.493729574 | 7 |
| TORBAFYLLINE                               | C0076835 | 9.87E-03 | n/a | 3 | 0.493729574 | 7 |
| GROWTH HORMONE RECEPTOR ANTAGONIST         | C1947982 | 9.87E-03 | n/a | 3 | 0.493729574 | 7 |
| CRISAMICIN A                               | C0056490 | 9.87E-03 | n/a | 3 | 0.493729574 | 7 |
| SINGLET                                    | C0723338 | 9.87E-03 | n/a | 3 | 0.493729574 | 7 |
| HIF 2ALPHA INHIBITOR PT2385                | C3896783 | 9.87E-03 | n/a | 3 | 0.493729574 | 7 |
| PKSI 527                                   | C0084061 | 9.87E-03 | n/a | 3 | 0.493729574 | 7 |
| S 2238                                     | C0073756 | 9.87E-03 | n/a | 3 | 0.493729574 | 7 |
| LANOTEPLASE                                | C0753753 | 9.87E-03 | n/a | 3 | 0.493729574 | 7 |
| ANTIPROTOZOAL AGENTS                       | C0003416 | 9.87E-03 | n/a | 3 | 0.493729574 | 7 |

|                                           |          |          |     |   |             |   |
|-------------------------------------------|----------|----------|-----|---|-------------|---|
| ZINQUIN                                   | C0249733 | 9.87E-03 | n/a | 3 | 0.493729574 | 7 |
| SPIRADOLINE                               | C0143266 | 9.87E-03 | n/a | 3 | 0.493729574 | 7 |
| HEXTEND                                   | C1170317 | 9.87E-03 | n/a | 3 | 0.493729574 | 7 |
| AN3485                                    | C3661155 | 9.87E-03 | n/a | 3 | 0.493729574 | 7 |
| PEG PLGA                                  | C3849743 | 9.87E-03 | n/a | 3 | 0.493729574 | 7 |
| AN6414                                    | C3661233 | 4.97E-03 | n/a | 2 | 0.141065592 | 2 |
| JZP 430                                   | C4079896 | 4.97E-03 | n/a | 2 | 0.141065592 | 2 |
| DIPHThERIA ANTITOXIN                      | C0012547 | 4.97E-03 | n/a | 2 | 0.141065592 | 2 |
| SUCCINYLALBUMIN                           | C0075459 | 4.97E-03 | n/a | 2 | 0.141065592 | 2 |
| OCTOCOG ALFA                              | C1691209 | 4.97E-03 | n/a | 2 | 0.141065592 | 2 |
| CORBRIN                                   | C0390439 | 4.97E-03 | n/a | 2 | 0.141065592 | 2 |
| REACTIVE RED 2                            | C0387847 | 4.97E-03 | n/a | 2 | 0.141065592 | 2 |
| MS 247                                    | C0908719 | 4.97E-03 | n/a | 2 | 0.141065592 | 2 |
| BRIMONIDINE TARTRATE TIMOLOL MALEATE DRUG | C4042830 | 4.97E-03 | n/a | 2 | 0.141065592 | 2 |
| PENTETATE                                 | C1702916 | 4.97E-03 | n/a | 2 | 0.141065592 | 2 |
| AM 5206                                   | C3177710 | 4.97E-03 | n/a | 2 | 0.141065592 | 2 |
| ARACYTIN                                  | C1511628 | 4.97E-03 | n/a | 2 | 0.141065592 | 2 |
| OCTIMIBATE                                | C0069352 | 4.97E-03 | n/a | 2 | 0.141065592 | 2 |
| SY 640                                    | C0385278 | 4.97E-03 | n/a | 2 | 0.141065592 | 2 |
| ATROPA BELLADONNA                         | C0301370 | 4.97E-03 | n/a | 2 | 0.141065592 | 2 |
| CHO DEUNG SAN                             | C1566301 | 4.97E-03 | n/a | 2 | 0.141065592 | 2 |
| LY 223982                                 | C0083281 | 4.97E-03 | n/a | 2 | 0.141065592 | 2 |
| RU 27987                                  | C0073665 | 4.97E-03 | n/a | 2 | 0.141065592 | 2 |
| HUMAN PLASMA PREPARATION                  | C0304926 | 4.97E-03 | n/a | 2 | 0.141065592 | 2 |
| EUROPEAN OLIVE POLLEN EXTRACT             | C2701713 | 4.97E-03 | n/a | 2 | 0.141065592 | 2 |
| PENTADECYLAMINE                           | C3501270 | 4.97E-03 | n/a | 2 | 0.141065592 | 2 |
| CGS 23885                                 | C0527949 | 4.97E-03 | n/a | 2 | 0.141065592 | 2 |
| TETRASTARCH                               | C1816356 | 4.97E-03 | n/a | 2 | 0.141065592 | 2 |
| BALUGRASTIM                               | C3871462 | 4.97E-03 | n/a | 2 | 0.141065592 | 2 |
| LERISETRON                                | C0758799 | 4.97E-03 | n/a | 2 | 0.141065592 | 2 |
| MHY407                                    | C3661098 | 4.97E-03 | n/a | 2 | 0.141065592 | 2 |
| ZOLPIDEM TARTRATE                         | C0724725 | 4.97E-03 | n/a | 2 | 0.141065592 | 2 |
| CARBOXYCINNAMIC ACID BISHYDROXAMIDE       | C0672711 | 4.97E-03 | n/a | 2 | 0.141065592 | 2 |
| OPHTHALMIC PREPARATION                    | C0304650 | 4.97E-03 | n/a | 2 | 0.141065592 | 2 |
| FIRATEGRAST                               | C2700183 | 4.97E-03 | n/a | 2 | 0.141065592 | 2 |
| CT 1418                                   | C0764328 | 4.97E-03 | n/a | 2 | 0.141065592 | 2 |
| MDL 27695                                 | C0065806 | 4.97E-03 | n/a | 2 | 0.141065592 | 2 |
| RECOMBINANT HUMAN ALBUMIN HUMAN GRAN      | C2825833 | 4.97E-03 | n/a | 2 | 0.141065592 | 2 |
| 1 CYCLOHEXYL 3 DODECYLUREA                | C1121212 | 4.97E-03 | n/a | 2 | 0.141065592 | 2 |
| GALMIC                                    | C1455539 | 4.97E-03 | n/a | 2 | 0.141065592 | 2 |
| BMS 817399                                | C3886791 | 4.97E-03 | n/a | 2 | 0.141065592 | 2 |
| BMS 457                                   | C3713233 | 4.97E-03 | n/a | 2 | 0.141065592 | 2 |
| CDMI                                      | C0045683 | 4.97E-03 | n/a | 2 | 0.141065592 | 2 |
| PROVERA                                   | C0699702 | 4.97E-03 | n/a | 2 | 0.141065592 | 2 |

|                                           |          |          |     |   |             |   |
|-------------------------------------------|----------|----------|-----|---|-------------|---|
| DEXTRAN T 70                              | C0011802 | 4.97E-03 | n/a | 2 | 0.141065592 | 2 |
| HAEMOPHILUS INFLUENZAE TYPE B POLYSACCHAR | C0062085 | 4.97E-03 | n/a | 2 | 0.141065592 | 2 |
| LEONURUS CARDIACA EXTRACT                 | C3486751 | 4.97E-03 | n/a | 2 | 0.141065592 | 2 |
| 1,2 DIAMINO 4,5 METHYLENEDIOXYBENZENE     | C0209062 | 4.97E-03 | n/a | 2 | 0.141065592 | 2 |
| ICI 128436                                | C0123076 | 4.97E-03 | n/a | 2 | 0.141065592 | 2 |
| M NITROBENZOYLALANINE                     | C0252609 | 4.97E-03 | n/a | 2 | 0.141065592 | 2 |
| LYSOCELLIN                                | C0065382 | 4.97E-03 | n/a | 2 | 0.141065592 | 2 |
| SSR180575                                 | C1136821 | 4.97E-03 | n/a | 2 | 0.141065592 | 2 |

**Pharmacological Substances (Genomatix) enriched in IDH1<sup>MUT</sup> patient (TCGA)**

ATRA-related Gene signature

VD-related Gene Signature

| Pharmacological substance                    | Pharmacological substance | P-value  | Adjusted p-value | # Genes (observed) | # Genes (expected) | # Genes (total) |
|----------------------------------------------|---------------------------|----------|------------------|--------------------|--------------------|-----------------|
| TRETINOIN                                    | C0040845                  | 1.05E-04 | n/a              | 15                 | 5.03633047         | 989             |
| RETINOLIDS                                   | C0035339                  | 2.04E-04 | n/a              | 13                 | 4.155354564        | 816             |
| TRICHOSTATIN A                               | C0077063                  | 3.27E-03 | n/a              | 8                  | 2.490157331        | 489             |
| CYCLOHEXIMIDE                                | C0010572                  | 3.02E-03 | n/a              | 7                  | 1.924906894        | 378             |
| CYCLIN DEPENDENT KINASE INHIBITOR AGENTS     | C1511576                  | 2.47E-03 | n/a              | 6                  | 1.374933495        | 270             |
| FUCOIDAN                                     | C0060794                  | 4.63E-04 | n/a              | 5                  | 0.646727978        | 127             |
| HYDROCORTISONE                               | C0020268                  | 1.59E-03 | n/a              | 5                  | 0.850421829        | 167             |
| VP 16                                        | C0733688                  | 8.40E-03 | n/a              | 5                  | 1.257809531        | 247             |
| BACTERICIDAL PERMEABILITY INCREASING PROTEIN | C0052897                  | 7.82E-05 | n/a              | 4                  | 0.229155583        | 45              |
| PREGNANT MARE SERUM GONADOTROPINS            | C1136247                  | 1.18E-03 | n/a              | 4                  | 0.463403511        | 91              |
| TYRPHOSTIN AG 1478                           | C0528985                  | 3.64E-03 | n/a              | 4                  | 0.631450939        | 124             |
| BAFILOMYCIN A1                               | C0052919                  | 4.20E-03 | n/a              | 4                  | 0.65691267         | 129             |
| ANISOMYCIN                                   | C0003082                  | 6.19E-03 | n/a              | 4                  | 0.733297864        | 144             |
| 8 BROMO CYCLIC ADENOSINE MONOPHOSPHATE       | C0000661                  | 7.64E-03 | n/a              | 4                  | 0.779128981        | 153             |
| CERULETIDE                                   | C0006639                  | 9.70E-03 | n/a              | 4                  | 0.83514479         | 164             |
| RECOMBINANT FIBROBLAST GROWTH FACTOR 2       | C1522505                  | 7.99E-04 | n/a              | 3                  | 0.183324466        | 36              |
| HERCEPTIN                                    | C0338204                  | 1.44E-03 | n/a              | 3                  | 0.224063236        | 44              |
| TRAUMEEL S                                   | C0968917                  | 1.74E-03 | n/a              | 3                  | 0.239340275        | 47              |
| IMO                                          | C1517800                  | 2.60E-03 | n/a              | 3                  | 0.274986699        | 54              |
| AMPICILLIN                                   | C0002680                  | 4.79E-03 | n/a              | 3                  | 0.341187201        | 67              |
| AMPICILLINS                                  | C2095775                  | 4.79E-03 | n/a              | 3                  | 0.341187201        | 67              |
| RICINUS COMMUNIS WHOLE EXTRACT               | C3537211                  | 6.09E-03 | n/a              | 3                  | 0.371741278        | 73              |
| DYNE VETERINARY DRUG                         | C0308914                  | 8.39E-03 | n/a              | 3                  | 0.417572395        | 82              |
| MINERALOCORTICOLDS                           | C0026160                  | 9.26E-03 | n/a              | 3                  | 0.432849434        | 85              |
| NITRIC OXIDE SYNTHASE INHIBITOR              | C1373060                  | 9.56E-03 | n/a              | 3                  | 0.43794178         | 86              |
| LEX 032                                      | C0381874                  | 3.78E-04 | n/a              | 2                  | 0.030554078        | 6               |
| DIFID                                        | C3490744                  | 7.01E-04 | n/a              | 2                  | 0.04073877         | 8               |
| ARJUNOLIC ACID                               | C0638629                  | 8.99E-04 | n/a              | 2                  | 0.045831117        | 9               |
| FACTOR XIIA INHIBITOR                        | C0208681                  | 1.12E-03 | n/a              | 2                  | 0.050923463        | 10              |
| MILATUZUMAB                                  | C2716103                  | 1.36E-03 | n/a              | 2                  | 0.056015809        | 11              |

|                                         |          |          |     |   |             |    |
|-----------------------------------------|----------|----------|-----|---|-------------|----|
| TACALCITOL                              | C0953467 | 2.23E-03 | n/a | 2 | 0.071292848 | 14 |
| BACTERICIDE                             | C0004635 | 2.57E-03 | n/a | 2 | 0.076385194 | 15 |
| HUMAN NEUTROPHIL PEPTIDE 1              | C0122620 | 3.31E-03 | n/a | 2 | 0.086569887 | 17 |
| TEZOSENTAN                              | C0907956 | 3.31E-03 | n/a | 2 | 0.086569887 | 17 |
| BB 3103                                 | C0666068 | 3.71E-03 | n/a | 2 | 0.091662233 | 18 |
| DEFIBROTIDE                             | C0057257 | 4.57E-03 | n/a | 2 | 0.101846926 | 20 |
| TENOXICAM                               | C0076096 | 5.04E-03 | n/a | 2 | 0.106939272 | 21 |
| SIVESTAT                                | C0130137 | 5.53E-03 | n/a | 2 | 0.112031618 | 22 |
| HUMAN NEUTROPHIL PEPTIDE 2              | C0122159 | 5.53E-03 | n/a | 2 | 0.112031618 | 22 |
| AZILSARTAN                              | C1958569 | 6.56E-03 | n/a | 2 | 0.122216311 | 24 |
| ADRENERGIC AGENTS                       | C0001637 | 7.11E-03 | n/a | 2 | 0.127308657 | 25 |
| CHYMOPAPAIN                             | C0008736 | 7.11E-03 | n/a | 2 | 0.127308657 | 25 |
| BET BROMODOMAINS 2/3/4 INHIBITOR OTX015 | C3641185 | 8.26E-03 | n/a | 2 | 0.13749335  | 27 |
| PIRARUBICIN                             | C0071126 | 8.87E-03 | n/a | 2 | 0.142585696 | 28 |
| STRONTIUM RANELATE                      | C0936139 | 8.87E-03 | n/a | 2 | 0.142585696 | 28 |
| WEB 2086                                | C0078460 | 9.49E-03 | n/a | 2 | 0.147678042 | 29 |
| MESNA                                   | C0000294 | 9.49E-03 | n/a | 2 | 0.147678042 | 29 |

Pharmacological Substances (Genomatix) enriched in H<sup>R132H</sup>

ATRA-related Gene signature

VD-related Gene Signature

| Pharmacological substance   | macological substan | P-value  | Adjusted p-value | # Genes (observed) | # Genes (expected) | # Genes (total) |
|-----------------------------|---------------------|----------|------------------|--------------------|--------------------|-----------------|
| TRETINOIN                   | C0040845            | 3.21E-03 | n/a              | 29                 | 16.9882192         | 989             |
| DEXAMETHASONE               | C0011777            | 1.75E-05 | n/a              | 22                 | 8.00456031         | 466             |
| DOXORUBICIN                 | C0013089            | 5.91E-03 | n/a              | 21                 | 11.54305693        | 672             |
| IONOMYCIN                   | C0022020            | 3.38E-06 | n/a              | 18                 | 5.067264574        | 295             |
| HEPARIN                     | C0019134            | 1.08E-03 | n/a              | 17                 | 7.30029642         | 425             |
| PORCINE HEPARIN             | C0770546            | 1.14E-03 | n/a              | 17                 | 7.334650756        | 427             |
| PROGESTERONE                | C0033308            | 4.25E-03 | n/a              | 16                 | 7.626662613        | 444             |
| INTERLEUKIN 12              | C0123759            | 1.46E-06 | n/a              | 14                 | 2.937295736        | 171             |
| INTERFERON TYPE I           | C0021743            | 7.36E-04 | n/a              | 14                 | 5.18750475         | 302             |
| GLYCOSAMINOGLYCANS          | C0017973            | 7.36E-04 | n/a              | 14                 | 5.18750475         | 302             |
| ENDOPEPTIDASES              | C0030946            | 1.28E-03 | n/a              | 14                 | 5.496693775        | 320             |
| INDOMETHACIN                | C0021246            | 2.66E-06 | n/a              | 13                 | 2.662461047        | 155             |
| RECOMBINANT ALPHA CHEMOKINE | C1527035            | 6.50E-06 | n/a              | 13                 | 2.885764232        | 168             |
| ALLERGEN                    | C3274161            | 3.39E-05 | n/a              | 13                 | 3.366724937        | 196             |
| DINOPROSTONE                | C0012472            | 8.78E-05 | n/a              | 13                 | 3.69309113         | 215             |
| SERPINS                     | C0036764            | 2.51E-04 | n/a              | 13                 | 4.105343163        | 239             |
| SODIUM BUTYRATE             | C0142812            | 5.04E-04 | n/a              | 13                 | 4.414532188        | 257             |
| BLEOMYCIN                   | C0005740            | 5.28E-03 | n/a              | 13                 | 5.754351296        | 335             |
| FUCOIDAN                    | C0060794            | 1.86E-06 | n/a              | 12                 | 2.181500342        | 127             |
| SB 203580                   | C0297666            | 6.83E-05 | n/a              | 12                 | 3.109067417        | 181             |
| CHYMOTRYPSIN                | C0008742            | 1.20E-04 | n/a              | 12                 | 3.298016265        | 192             |

|                                           |          |          |     |    |             |     |
|-------------------------------------------|----------|----------|-----|----|-------------|-----|
| CYTOCHALASINS                             | C0010739 | 9.81E-04 | n/a | 12 | 4.156874667 | 242 |
| TYROSINE                                  | C0041485 | 5.89E-03 | n/a | 12 | 5.170327582 | 301 |
| BUDESONIDE                                | C0054201 | 2.20E-06 | n/a | 11 | 1.837956981 | 107 |
| SERINE PROTEINASE INHIBITORS              | C0036733 | 1.24E-04 | n/a | 11 | 2.81705556  | 164 |
| VITAMIN D3                                | C3265062 | 1.98E-04 | n/a | 11 | 2.971650072 | 173 |
| PREDNISOLONE                              | C0032950 | 5.52E-04 | n/a | 11 | 3.349547769 | 195 |
| INTERFERON                                | C3652465 | 1.06E-03 | n/a | 11 | 3.624382458 | 211 |
| INTERFERONS                               | C0021747 | 1.06E-03 | n/a | 11 | 3.624382458 | 211 |
| RECOMBINANT INTERFERON                    | C1522537 | 1.06E-03 | n/a | 11 | 3.624382458 | 211 |
| HUMAN LEUKOCYTE INTERFERON                | C0733470 | 1.10E-03 | n/a | 11 | 3.641559626 | 212 |
| ASPIRIN                                   | C0004057 | 1.48E-03 | n/a | 11 | 3.77897697  | 220 |
| VP 16                                     | C0733688 | 3.65E-03 | n/a | 11 | 4.242760508 | 247 |
| BORTEZOMIB                                | C1176309 | 6.49E-03 | n/a | 11 | 4.586303869 | 267 |
| CYTOCHALASIN B                            | C0010737 | 6.25E-06 | n/a | 10 | 1.666185301 | 97  |
| RECOMBINANT INTERFERON ALPHA INDUCIBLE PR | C1522712 | 8.22E-06 | n/a | 10 | 1.717716805 | 100 |
| BETA GLUCANS                              | C1134651 | 2.25E-05 | n/a | 10 | 1.923842821 | 112 |
| IBUPROFEN                                 | C0020740 | 3.54E-05 | n/a | 10 | 2.02690583  | 118 |
| SODIUM ARSENITE                           | C0074719 | 4.71E-05 | n/a | 10 | 2.095614502 | 122 |
| RECOMBINANT MACROPHAGE COLONY STIMULAT    | C1524095 | 1.79E-04 | n/a | 10 | 2.456335031 | 143 |
| HEPATITIS B SURFACE ANTIGENS              | C0019168 | 2.08E-03 | n/a | 10 | 3.366724937 | 196 |
| UROKINASE                                 | C0042071 | 2.16E-03 | n/a | 10 | 3.383902105 | 197 |
| CHONDROITIN SULFATES                      | C0008466 | 2.16E-03 | n/a | 10 | 3.383902105 | 197 |
| CYCLOPHOSPHAMIDE                          | C0010583 | 4.75E-03 | n/a | 10 | 3.77897697  | 220 |
| PROSTAGLANDINS                            | C0033554 | 5.06E-03 | n/a | 10 | 3.813331307 | 222 |
| ARACHIDONATE 5 LIPOXYGENASE INHIBITORS    | C1289971 | 1.26E-07 | n/a | 9  | 0.841681234 | 49  |
| ALPHA 1 ANTITRYPSIN                       | C0002191 | 1.35E-06 | n/a | 9  | 1.099338755 | 64  |
| GLUCANS                                   | C0017696 | 1.62E-05 | n/a | 9  | 1.477236452 | 86  |
| PROLINEDITHIOCARBAMATE                    | C0084183 | 2.80E-05 | n/a | 9  | 1.58029946  | 92  |
| TANSHINONE II A                           | C0897640 | 5.03E-05 | n/a | 9  | 1.700539637 | 99  |
| MERBROMIN                                 | C0025397 | 9.95E-05 | n/a | 9  | 1.855134149 | 108 |
| APROTININ                                 | C0003641 | 1.07E-04 | n/a | 9  | 1.872311317 | 109 |
| TOLONIUM CHLORIDE                         | C0040380 | 1.41E-04 | n/a | 9  | 1.941019989 | 113 |
| BAPETA                                    | C0043775 | 1.96E-04 | n/a | 9  | 2.02690583  | 118 |
| ALPROSTADIL                               | C0002335 | 2.52E-04 | n/a | 9  | 2.095614502 | 122 |
| BAICALEIN                                 | C0052927 | 3.02E-04 | n/a | 9  | 2.147146006 | 125 |
| CELECOXIB                                 | C0538927 | 3.02E-04 | n/a | 9  | 2.147146006 | 125 |
| ARA C                                     | C0733521 | 3.21E-04 | n/a | 9  | 2.164323174 | 126 |
| PROTAMINES                                | C0033603 | 3.61E-04 | n/a | 9  | 2.19867751  | 128 |
| CARRAGEENAN                               | C0007289 | 5.05E-04 | n/a | 9  | 2.301740518 | 134 |
| MINOCYCLINE                               | C0026187 | 8.49E-04 | n/a | 9  | 2.473512199 | 144 |
| RITUXIMAB                                 | C0393022 | 8.49E-04 | n/a | 9  | 2.473512199 | 144 |
| PEPTIDOMIMETICS                           | C2936235 | 1.03E-03 | n/a | 9  | 2.542220871 | 148 |
| DEOXYGLUCOSE                              | C0011501 | 2.38E-03 | n/a | 9  | 2.868587064 | 167 |
| CHOLECALCIFEROL                           | C0008318 | 4.37E-03 | n/a | 9  | 3.143421753 | 183 |

|                                              |          |          |     |   |             |     |
|----------------------------------------------|----------|----------|-----|---|-------------|-----|
| IMMUNOLOGIC ADJUVANTS                        | C0001551 | 4.86E-03 | n/a | 9 | 3.194953257 | 186 |
| BACTERICIDAL PERMEABILITY INCREASING PROTEIN | C0052897 | 8.35E-07 | n/a | 8 | 0.772972562 | 45  |
| SODIUM SALICYLATE                            | C0037549 | 2.26E-06 | n/a | 8 | 0.87603557  | 51  |
| REBAMIPIDE                                   | C0069562 | 6.13E-06 | n/a | 8 | 0.996275747 | 58  |
| INFLAMMATION MEDIATORS                       | C0243042 | 1.02E-05 | n/a | 8 | 1.064984419 | 62  |
| ADENOSINE ETHYLCARBOXAMIDE 05 N              | C0050789 | 1.15E-05 | n/a | 8 | 1.082161587 | 63  |
| RECOMBINANT CYTOKINES                        | C1524094 | 1.83E-05 | n/a | 8 | 1.150870259 | 67  |
| POLYMYXIN B                                  | C0032535 | 2.81E-05 | n/a | 8 | 1.219578931 | 71  |
| RICINUS COMMUNIS WHOLE EXTRACT               | C3537211 | 3.45E-05 | n/a | 8 | 1.253933267 | 73  |
| CYSTEINYL LEUKOTRIENE                        | C0675175 | 6.12E-05 | n/a | 8 | 1.356996276 | 79  |
| MANNANS                                      | C0024727 | 2.26E-04 | n/a | 8 | 1.631830965 | 95  |
| BISPECIFIC ANTIBODY                          | C0206492 | 3.92E-04 | n/a | 8 | 1.769248309 | 103 |
| PROTEASE INHIBITORS                          | C0033607 | 4.47E-04 | n/a | 8 | 1.803602645 | 105 |
| TRIPTOLIDE                                   | C0077274 | 1.14E-03 | n/a | 8 | 2.078437334 | 121 |
| HERBIMYCIN                                   | C0062565 | 1.72E-03 | n/a | 8 | 2.215854678 | 129 |
| METHYLPREDNISOLONE                           | C0025815 | 1.99E-03 | n/a | 8 | 2.267386182 | 132 |
| GLYCOSIDE HYDROLASES                         | C0017976 | 2.29E-03 | n/a | 8 | 2.318917686 | 135 |
| FENRETINIDE                                  | C0060197 | 2.51E-03 | n/a | 8 | 2.353272022 | 137 |
| PROTEIN KINASE INHIBITORS                    | C1449702 | 5.32E-03 | n/a | 8 | 2.662461047 | 155 |
| SURAMIN                                      | C0038880 | 5.74E-03 | n/a | 8 | 2.696815383 | 157 |
| RECOMBINANT UROKINASE                        | C1522670 | 6.90E-03 | n/a | 8 | 2.782701224 | 162 |
| CERULETIDE                                   | C0006639 | 7.41E-03 | n/a | 8 | 2.81705556  | 164 |
| 4 HYDROXY 2 NONENAL                          | C0048297 | 7.95E-03 | n/a | 8 | 2.851409896 | 166 |
| HYDROCORTISONE                               | C0020268 | 8.23E-03 | n/a | 8 | 2.868587064 | 167 |
| LUTEOLIN                                     | C0065264 | 9.74E-03 | n/a | 8 | 2.954472904 | 172 |
| SIVELSTAT                                    | C0130137 | 5.51E-08 | n/a | 7 | 0.377897697 | 22  |
| LIPOXYGENASE INHIBITORS                      | C0085385 | 1.80E-06 | n/a | 7 | 0.601200882 | 35  |
| PERITONEAL DIALYSIS SOLUTION                 | C0353714 | 1.80E-06 | n/a | 7 | 0.601200882 | 35  |
| ANTI INFLAMMATORY AGENTS                     | C0003209 | 7.66E-06 | n/a | 7 | 0.738618226 | 43  |
| ELASTASE INHIBITOR                           | C0596481 | 1.22E-05 | n/a | 7 | 0.79014973  | 46  |
| RECOMBINANT GRANULOCYTE COLONY STIMULAT      | C0376562 | 2.14E-05 | n/a | 7 | 0.858858402 | 50  |
| PEONIFLORIN                                  | C0070320 | 2.45E-05 | n/a | 7 | 0.87603557  | 51  |
| OK 432                                       | C0918027 | 4.05E-05 | n/a | 7 | 0.944744243 | 55  |
| 4 BETA AMINOETHYLBENZOLSULFOFLUORIDE         | C0047895 | 7.16E-05 | n/a | 7 | 1.030630083 | 60  |
| 7 AMINOACTINOMYCIN D                         | C0049832 | 7.97E-05 | n/a | 7 | 1.047807251 | 61  |
| BETAMETHASONE                                | C0005308 | 7.97E-05 | n/a | 7 | 1.047807251 | 61  |
| TOSYLPHENYLALANYL CHLOROMETHYL KETONE        | C0040498 | 1.60E-04 | n/a | 7 | 1.168047427 | 68  |
| RECOMBINANT FLT3 LIGAND                      | C1522457 | 1.76E-04 | n/a | 7 | 1.185224595 | 69  |
| ACETYLMURAMYL ALANYL ISOGLUTAMINE            | C0001060 | 1.92E-04 | n/a | 7 | 1.202401763 | 70  |
| CALCIPOTRIENE                                | C0065767 | 3.49E-04 | n/a | 7 | 1.32264194  | 77  |
| LOW MOLECULAR WEIGHT HEPARIN                 | C0019139 | 4.08E-04 | n/a | 7 | 1.356996276 | 79  |
| DIMETHYL FUMARATE                            | C0058218 | 4.41E-04 | n/a | 7 | 1.374173444 | 80  |
| ADALIMUMAB                                   | C1122087 | 6.84E-04 | n/a | 7 | 1.477236452 | 86  |
| FACTOR XIII                                  | C0015528 | 1.02E-03 | n/a | 7 | 1.58029946  | 92  |

|                                               |          |          |     |   |             |     |
|-----------------------------------------------|----------|----------|-----|---|-------------|-----|
| LIPOPEPTIDES                                  | C2266975 | 1.16E-03 | n/a | 7 | 1.614653796 | 94  |
| TELMISARTAN                                   | C0248719 | 1.31E-03 | n/a | 7 | 1.649008133 | 96  |
| PEPSIN A                                      | C0030909 | 1.66E-03 | n/a | 7 | 1.717716805 | 100 |
| MEPRIN                                        | C0733413 | 2.72E-03 | n/a | 7 | 1.872311317 | 109 |
| EPOPROSTENOL                                  | C0033567 | 4.43E-03 | n/a | 7 | 2.044082998 | 119 |
| MITOGEN ACTIVATED PROTEIN KINASE INHIBITOR    | C1513344 | 7.74E-03 | n/a | 7 | 2.267386182 | 132 |
| SULFORAFAN                                    | C0163159 | 8.38E-03 | n/a | 7 | 2.301740518 | 134 |
| MONENSIN                                      | C0026408 | 9.77E-03 | n/a | 7 | 2.370449191 | 138 |
| BACTERICIDE                                   | C0004635 | 1.06E-07 | n/a | 6 | 0.257657521 | 15  |
| FILGRASTIM                                    | C0210630 | 3.76E-07 | n/a | 6 | 0.309189025 | 18  |
| NEDOCROMIL SODIUM                             | C0886658 | 1.42E-06 | n/a | 6 | 0.377897697 | 22  |
| PYRROLIDINEDITHIOCARBAMATE                    | C1313719 | 4.15E-06 | n/a | 6 | 0.446606369 | 26  |
| FOSFOMYCIN                                    | C0016610 | 5.26E-06 | n/a | 6 | 0.463783537 | 27  |
| PROCATEROL                                    | C0072032 | 6.60E-06 | n/a | 6 | 0.480960705 | 28  |
| ALPHA,BETA METHYLENEADENOSINE 5' TRIPHOSPHATE | C0051285 | 2.16E-05 | n/a | 6 | 0.584023714 | 34  |
| ZINC OXIDE                                    | C0043491 | 2.57E-05 | n/a | 6 | 0.601200882 | 35  |
| VISCUM ALBUM PREPARATION                      | C1166209 | 6.54E-05 | n/a | 6 | 0.70426389  | 41  |
| RECOMBINANT INTERFERON GAMMA                  | C0021740 | 7.52E-05 | n/a | 6 | 0.721441058 | 42  |
| SALMETEROL                                    | C0073992 | 1.12E-04 | n/a | 6 | 0.772972562 | 45  |
| SU 5416                                       | C0762592 | 1.12E-04 | n/a | 6 | 0.772972562 | 45  |
| PHENYLMETHYLSULFONYL FLUORIDE                 | C0031493 | 2.03E-04 | n/a | 6 | 0.858858402 | 50  |
| BUTEIN                                        | C0054245 | 3.45E-04 | n/a | 6 | 0.944744243 | 55  |
| RECOMBINANT INTERLEUKIN 4                     | C1522540 | 3.81E-04 | n/a | 6 | 0.961921411 | 56  |
| TOFACITINIB                                   | C2930696 | 4.20E-04 | n/a | 6 | 0.979098579 | 57  |
| MYXOVIRUS RESISTANCE PROTEINS                 | C0072378 | 5.07E-04 | n/a | 6 | 1.013452915 | 59  |
| OSTHOL                                        | C0069679 | 6.07E-04 | n/a | 6 | 1.047807251 | 61  |
| CYCLOOXYGENASE 2 INHIBITORS                   | C1257954 | 6.07E-04 | n/a | 6 | 1.047807251 | 61  |
| THROMBIN INHIBITORS                           | C2746042 | 6.07E-04 | n/a | 6 | 1.047807251 | 61  |
| TETRAMETHYLPYRAZINE                           | C0076305 | 6.62E-04 | n/a | 6 | 1.064984419 | 62  |
| HIRUDIN                                       | C0019573 | 7.22E-04 | n/a | 6 | 1.082161587 | 63  |
| LEVAMISOLE                                    | C0023556 | 7.22E-04 | n/a | 6 | 1.082161587 | 63  |
| NS398                                         | C1567346 | 7.22E-04 | n/a | 6 | 1.082161587 | 63  |
| HIRUDINS                                      | C1451270 | 7.22E-04 | n/a | 6 | 1.082161587 | 63  |
| HYALURONATE                                   | C0178695 | 8.53E-04 | n/a | 6 | 1.116515923 | 65  |
| CHONDROITIN 4 SULFATE                         | C0086008 | 1.68E-03 | n/a | 6 | 1.271110436 | 74  |
| BRYOSTATIN 1                                  | C0054173 | 1.93E-03 | n/a | 6 | 1.305464772 | 76  |
| BISINDOLYLMALEIMIDE I                         | C0091914 | 2.06E-03 | n/a | 6 | 1.32264194  | 77  |
| ALLOPURINOL                                   | C0002144 | 2.06E-03 | n/a | 6 | 1.32264194  | 77  |
| MATRINE                                       | C0065751 | 2.35E-03 | n/a | 6 | 1.356996276 | 79  |
| NARINGIN                                      | C0068451 | 2.35E-03 | n/a | 6 | 1.356996276 | 79  |
| URSOLIC ACID                                  | C0077938 | 2.51E-03 | n/a | 6 | 1.374173444 | 80  |
| CARNOSINE                                     | C0007267 | 2.67E-03 | n/a | 6 | 1.391350612 | 81  |
| OXOPHENYLARSINE                               | C0069795 | 2.84E-03 | n/a | 6 | 1.40852778  | 82  |
| GROWTH INHIBITORS                             | C0018282 | 3.02E-03 | n/a | 6 | 1.425704948 | 83  |

|                                           |          |          |     |   |             |     |
|-------------------------------------------|----------|----------|-----|---|-------------|-----|
| CORDYCEPIN                                | C0056331 | 3.02E-03 | n/a | 6 | 1.425704948 | 83  |
| THIAZOLIDINEDIONES                        | C1257987 | 3.21E-03 | n/a | 6 | 1.442882116 | 84  |
| COBALTOUS CHLORIDE                        | C0056036 | 3.40E-03 | n/a | 6 | 1.460059284 | 85  |
| 2,4 THIAZOLIDINEDIONE                     | C0289779 | 3.60E-03 | n/a | 6 | 1.477236452 | 86  |
| ADENINE NUCLEOTIDES                       | C0001413 | 3.60E-03 | n/a | 6 | 1.477236452 | 86  |
| CHRYSLIN                                  | C0055661 | 4.27E-03 | n/a | 6 | 1.528767956 | 89  |
| RIBOFLAVIN                                | C0035527 | 4.51E-03 | n/a | 6 | 1.545945124 | 90  |
| SALICYLATE                                | C0036075 | 5.29E-03 | n/a | 6 | 1.597476628 | 93  |
| SALICYLATES                               | C0036077 | 5.29E-03 | n/a | 6 | 1.597476628 | 93  |
| NITRITE ION                               | C3848529 | 5.58E-03 | n/a | 6 | 1.614653796 | 94  |
| CATECHIN                                  | C0007404 | 5.87E-03 | n/a | 6 | 1.631830965 | 95  |
| OVARIAN HORMONE                           | C0729511 | 6.17E-03 | n/a | 6 | 1.649008133 | 96  |
| MATRIX METALLOPROTEINASE INHIBITORS       | C1513016 | 6.49E-03 | n/a | 6 | 1.666185301 | 97  |
| INFLIXIMAB                                | C0666743 | 7.50E-03 | n/a | 6 | 1.717716805 | 100 |
| PENICILLIN                                | C0220892 | 7.86E-03 | n/a | 6 | 1.734893973 | 101 |
| PENICILLINS                               | C0030842 | 7.86E-03 | n/a | 6 | 1.734893973 | 101 |
| BENZYLXYCARBONYLVALYL ALANYL ASPARTYL FLI | C0383779 | 8.24E-03 | n/a | 6 | 1.752071141 | 102 |
| PARTHENOLIDE                              | C0070126 | 8.24E-03 | n/a | 6 | 1.752071141 | 102 |
| LYCOPENE                                  | C0065331 | 8.24E-03 | n/a | 6 | 1.752071141 | 102 |
| CILOSTAZOL                                | C0055729 | 9.44E-03 | n/a | 6 | 1.803602645 | 105 |
| HA 1A                                     | C0120659 | 7.68E-08 | n/a | 5 | 0.137417344 | 8   |
| MAPRACORAT                                | C3252363 | 7.48E-06 | n/a | 5 | 0.292011857 | 17  |
| DEFIBROTIDE                               | C0057257 | 1.80E-05 | n/a | 5 | 0.343543361 | 20  |
| ONO 1301                                  | C0538030 | 5.74E-05 | n/a | 5 | 0.429429201 | 25  |
| CORM 2                                    | C1120350 | 8.48E-05 | n/a | 5 | 0.463783537 | 27  |
| WEB 2086                                  | C0078460 | 1.21E-04 | n/a | 5 | 0.498137873 | 29  |
| NIACINAMIDE                               | C0028027 | 1.44E-04 | n/a | 5 | 0.515315041 | 30  |
| INDO 1                                    | C0063477 | 1.97E-04 | n/a | 5 | 0.549669378 | 32  |
| NINTEDANIB                                | C2930789 | 2.29E-04 | n/a | 5 | 0.566846546 | 33  |
| LAMINARAN                                 | C0064631 | 2.65E-04 | n/a | 5 | 0.584023714 | 34  |
| MK 886                                    | C0128640 | 3.05E-04 | n/a | 5 | 0.601200882 | 35  |
| KETOROLAC                                 | C0073631 | 3.49E-04 | n/a | 5 | 0.61837805  | 36  |
| CEFOTAXIME                                | C0007554 | 3.49E-04 | n/a | 5 | 0.61837805  | 36  |
| SODIUM DODECYL SULFATE                    | C0037506 | 3.98E-04 | n/a | 5 | 0.635555218 | 37  |
| PURINERGIC P1 RECEPTOR AGONISTS           | C2917322 | 4.52E-04 | n/a | 5 | 0.652732386 | 38  |
| ALLOGENEIC LYMPHOCYTES                    | C0879438 | 5.12E-04 | n/a | 5 | 0.669909554 | 39  |
| INTRAVESICAL BCG                          | C1289970 | 5.77E-04 | n/a | 5 | 0.687086722 | 40  |
| ABATACEPT                                 | C1619966 | 1.22E-03 | n/a | 5 | 0.807326898 | 47  |
| RADIOIMMUNOCONJUGATES                     | C0243019 | 1.34E-03 | n/a | 5 | 0.824504066 | 48  |
| ITF 2357                                  | C1571394 | 1.62E-03 | n/a | 5 | 0.858858402 | 50  |
| GLIOTOXIN                                 | C0017641 | 1.62E-03 | n/a | 5 | 0.858858402 | 50  |
| ALLICIN                                   | C0051200 | 1.62E-03 | n/a | 5 | 0.858858402 | 50  |
| FLUTICASONE                               | C0082607 | 1.93E-03 | n/a | 5 | 0.893212738 | 52  |
| PIROXICAM                                 | C0031990 | 2.10E-03 | n/a | 5 | 0.910389907 | 53  |



|                                                              |          |          |     |   |             |    |
|--------------------------------------------------------------|----------|----------|-----|---|-------------|----|
| NS 398                                                       | C0215737 | 2.28E-03 | n/a | 5 | 0.927567075 | 54 |
| CAP18 LIPOPOLYSACCHARIDE BINDING PROTEIN                     | C0108282 | 2.28E-03 | n/a | 5 | 0.927567075 | 54 |
| TRANS RESVERATROL                                            | C1101322 | 2.28E-03 | n/a | 5 | 0.927567075 | 54 |
| DIALYSIS SOLUTIONS                                           | C0011947 | 2.48E-03 | n/a | 5 | 0.944744243 | 55 |
| EFAVIRENZ                                                    | C0674428 | 2.90E-03 | n/a | 5 | 0.979098579 | 57 |
| CAFFEIC ACID                                                 | C0054433 | 2.90E-03 | n/a | 5 | 0.979098579 | 57 |
| EGG LYSOZYME                                                 | C4040986 | 3.13E-03 | n/a | 5 | 0.996275747 | 58 |
| PAMIDRONATE                                                  | C0043603 | 3.13E-03 | n/a | 5 | 0.996275747 | 58 |
| OMPTIN                                                       | C0285969 | 3.13E-03 | n/a | 5 | 0.996275747 | 58 |
| NIGERICIN                                                    | C0028076 | 3.63E-03 | n/a | 5 | 1.030630083 | 60 |
| TRANILAST                                                    | C0146337 | 3.90E-03 | n/a | 5 | 1.047807251 | 61 |
| EDELFOSE                                                     | C0044549 | 3.90E-03 | n/a | 5 | 1.047807251 | 61 |
| ERYTHROPOIETIN                                               | C0014822 | 4.48E-03 | n/a | 5 | 1.082161587 | 63 |
| CIGLITAZONE                                                  | C0055721 | 4.79E-03 | n/a | 5 | 1.099338755 | 64 |
| RHEIN                                                        | C0073177 | 5.12E-03 | n/a | 5 | 1.116515923 | 65 |
| SULINDAC SULFIDE                                             | C0075615 | 5.46E-03 | n/a | 5 | 1.133693091 | 66 |
| SULFASALAZINE                                                | C0036078 | 6.20E-03 | n/a | 5 | 1.168047427 | 68 |
| ILOPROST                                                     | C0079594 | 6.59E-03 | n/a | 5 | 1.185224595 | 69 |
| IMMUNE SERA                                                  | C0020960 | 6.59E-03 | n/a | 5 | 1.185224595 | 69 |
| NELFINAVIR                                                   | C0525005 | 6.59E-03 | n/a | 5 | 1.185224595 | 69 |
| PROTEIN SYNTHESIS INHIBITORS                                 | C0033671 | 7.00E-03 | n/a | 5 | 1.202401763 | 70 |
| PYRROLIDINE DITHIOCARBAMATE                                  | C0163305 | 7.43E-03 | n/a | 5 | 1.219578931 | 71 |
| MONOPHOSPHORYL LIPID A                                       | C0066776 | 7.43E-03 | n/a | 5 | 1.219578931 | 71 |
| CLODRONATE                                                   | C0162357 | 7.88E-03 | n/a | 5 | 1.236756099 | 72 |
| CLARITHROMYCIN                                               | C0055856 | 9.32E-03 | n/a | 5 | 1.288287604 | 75 |
| SILYMARIN                                                    | C0037135 | 9.84E-03 | n/a | 5 | 1.305464772 | 76 |
| ICI 200355                                                   | C0123089 | 2.85E-06 | n/a | 4 | 0.120240176 | 7  |
| ONO 5046                                                     | C0133951 | 1.64E-05 | n/a | 4 | 0.17177168  | 10 |
| ISOACTEOSIDE                                                 | C0641716 | 5.37E-05 | n/a | 4 | 0.223303185 | 13 |
| CYL 26Z                                                      | C1613957 | 5.37E-05 | n/a | 4 | 0.223303185 | 13 |
| CP 105696                                                    | C0289246 | 5.37E-05 | n/a | 4 | 0.223303185 | 13 |
| RWJ 67657                                                    | C0910100 | 7.41E-05 | n/a | 4 | 0.240480353 | 14 |
| THENOYLTRIFLUOROACETONE                                      | C0039757 | 7.41E-05 | n/a | 4 | 0.240480353 | 14 |
| TEPOXALIN                                                    | C0145162 | 9.97E-05 | n/a | 4 | 0.257657521 | 15 |
| RECOMBINANT GRANULOCYTE MACROPHAGE COLONY STIMULATING FACTOR | C0376563 | 1.31E-04 | n/a | 4 | 0.274834689 | 16 |
| URANYL ACETATE                                               | C0077854 | 2.15E-04 | n/a | 4 | 0.309189025 | 18 |
| SR 11237                                                     | C0254507 | 2.15E-04 | n/a | 4 | 0.309189025 | 18 |
| 5 CHLOROMETHYLFLUORESCCEIN DIACETATE                         | C0110185 | 2.15E-04 | n/a | 4 | 0.309189025 | 18 |
| BORRELIDIN                                                   | C0053956 | 2.68E-04 | n/a | 4 | 0.326366193 | 19 |
| OLPRINONE                                                    | C0637063 | 2.68E-04 | n/a | 4 | 0.326366193 | 19 |
| POLAPREZINC                                                  | C0286382 | 3.31E-04 | n/a | 4 | 0.343543361 | 20 |
| EPINASTINE                                                   | C0078442 | 3.31E-04 | n/a | 4 | 0.343543361 | 20 |
| CILOMILAST                                                   | C0968887 | 3.31E-04 | n/a | 4 | 0.343543361 | 20 |
| ADSORBENTS                                                   | C0350056 | 4.03E-04 | n/a | 4 | 0.360720529 | 21 |

|                                        |          |          |     |   |             |    |
|----------------------------------------|----------|----------|-----|---|-------------|----|
| KH 1060                                | C0167620 | 4.03E-04 | n/a | 4 | 0.360720529 | 21 |
| SHETA2                                 | C1260101 | 4.86E-04 | n/a | 4 | 0.377897697 | 22 |
| SC 236                                 | C0767382 | 5.81E-04 | n/a | 4 | 0.395074865 | 23 |
| RECOMBINANT HUMAN GRANULOCYTE COLONY S | C1271481 | 5.81E-04 | n/a | 4 | 0.395074865 | 23 |
| METHIONYLMETHYLSULFONIUM CHLORIDE      | C0658922 | 5.81E-04 | n/a | 4 | 0.395074865 | 23 |
| REACTIVE BLUE 2                        | C0140012 | 6.87E-04 | n/a | 4 | 0.412252033 | 24 |
| ADRENERGIC AGENTS                      | C0001637 | 8.07E-04 | n/a | 4 | 0.429429201 | 25 |
| CHYMOPAPAIN                            | C0008736 | 8.07E-04 | n/a | 4 | 0.429429201 | 25 |
| DICLOFENAC SODIUM                      | C0700583 | 8.07E-04 | n/a | 4 | 0.429429201 | 25 |
| TENIDAP                                | C0076092 | 8.07E-04 | n/a | 4 | 0.429429201 | 25 |
| AZELASTINE                             | C0052762 | 9.41E-04 | n/a | 4 | 0.446606369 | 26 |
| CIS UROCANIC ACID                      | C3274548 | 9.41E-04 | n/a | 4 | 0.446606369 | 26 |
| FERUMOXIDES                            | C0246249 | 1.26E-03 | n/a | 4 | 0.480960705 | 28 |
| LAMBDA CARRAGEENAN                     | C0022971 | 1.26E-03 | n/a | 4 | 0.480960705 | 28 |
| TAPI 1                                 | C0294540 | 1.44E-03 | n/a | 4 | 0.498137873 | 29 |
| FK778                                  | C1142717 | 1.64E-03 | n/a | 4 | 0.515315041 | 30 |
| BENZALKONIUM CHLORIDE                  | C0005026 | 1.64E-03 | n/a | 4 | 0.515315041 | 30 |
| CC 4047                                | C1176324 | 1.64E-03 | n/a | 4 | 0.515315041 | 30 |
| COOMASSIE BRILLIANT BLUE               | C0056270 | 1.64E-03 | n/a | 4 | 0.515315041 | 30 |
| TIGECYCLINE                            | C1260298 | 1.64E-03 | n/a | 4 | 0.515315041 | 30 |
| BOLDINE                                | C0053908 | 1.64E-03 | n/a | 4 | 0.515315041 | 30 |
| CEPHARANTHINE                          | C0055082 | 1.85E-03 | n/a | 4 | 0.532492209 | 31 |
| SERPIN SUPERFAMILY                     | C0036763 | 2.09E-03 | n/a | 4 | 0.549669378 | 32 |
| CHYMOSTATIN                            | C0055676 | 2.09E-03 | n/a | 4 | 0.549669378 | 32 |
| SESAMOL                                | C0074406 | 2.09E-03 | n/a | 4 | 0.549669378 | 32 |
| RECOMBINANT HUMAN THROMBOPOIETIN       | C0392939 | 2.09E-03 | n/a | 4 | 0.549669378 | 32 |
| TAPI 2                                 | C0389500 | 2.09E-03 | n/a | 4 | 0.549669378 | 32 |
| GLUCURONYL GLUCOSAMINE GLYCAN SULFATE  | C0061450 | 2.09E-03 | n/a | 4 | 0.549669378 | 32 |
| OPRELVEKIN                             | C0537670 | 2.35E-03 | n/a | 4 | 0.566846546 | 33 |
| LORATADINE                             | C0065180 | 2.35E-03 | n/a | 4 | 0.566846546 | 33 |
| USTEKINUMAB                            | C1608841 | 2.62E-03 | n/a | 4 | 0.584023714 | 34 |
| CRANBERRY ALLERGENIC EXTRACT           | C2740793 | 2.62E-03 | n/a | 4 | 0.584023714 | 34 |
| TOSYLLYSINE CHLOROMETHYL KETONE        | C0040495 | 2.62E-03 | n/a | 4 | 0.584023714 | 34 |
| CRANBERRY PREPARATION                  | C0453273 | 2.62E-03 | n/a | 4 | 0.584023714 | 34 |
| RECOMBINANT INTERLEUKIN 8              | C1527432 | 2.92E-03 | n/a | 4 | 0.601200882 | 35 |
| ZIRCONIUM OXIDE                        | C0078814 | 2.92E-03 | n/a | 4 | 0.601200882 | 35 |
| IMMUNOGLOBULIN D                       | C0020843 | 2.92E-03 | n/a | 4 | 0.601200882 | 35 |
| OLOPATADINE                            | C0527189 | 2.92E-03 | n/a | 4 | 0.601200882 | 35 |
| METYRAPONE                             | C0025876 | 3.24E-03 | n/a | 4 | 0.61837805  | 36 |
| IMMUNOL                                | C1517844 | 3.24E-03 | n/a | 4 | 0.61837805  | 36 |
| FLUORO JADE                            | C1097415 | 3.96E-03 | n/a | 4 | 0.652732386 | 38 |
| AG 126                                 | C0526815 | 4.35E-03 | n/a | 4 | 0.669909554 | 39 |
| ROFLUMILAST                            | C0965618 | 4.35E-03 | n/a | 4 | 0.669909554 | 39 |
| AS 101                                 | C0950716 | 4.35E-03 | n/a | 4 | 0.669909554 | 39 |

|                                        |          |          |     |   |             |    |
|----------------------------------------|----------|----------|-----|---|-------------|----|
| KETOTIFEN                              | C0022642 | 4.35E-03 | n/a | 4 | 0.669909554 | 39 |
| RNA SYNTHESIS INHIBITORS               | C0376567 | 4.77E-03 | n/a | 4 | 0.687086722 | 40 |
| PKH 26                                 | C0137168 | 4.77E-03 | n/a | 4 | 0.687086722 | 40 |
| MILRINONE                              | C0128513 | 5.69E-03 | n/a | 4 | 0.721441058 | 42 |
| COMPOUND 20                            | C0056212 | 5.69E-03 | n/a | 4 | 0.721441058 | 42 |
| CASTANOSPERMINE                        | C0054849 | 5.69E-03 | n/a | 4 | 0.721441058 | 42 |
| CUPRAMMONIUM CELLULOSE                 | C0056591 | 6.19E-03 | n/a | 4 | 0.738618226 | 43 |
| CATHELICIDIN LL 37                     | C3891304 | 6.19E-03 | n/a | 4 | 0.738618226 | 43 |
| THEAFLAVIN                             | C0076379 | 6.19E-03 | n/a | 4 | 0.738618226 | 43 |
| PENTOXIFYLLINE                         | C0030899 | 6.19E-03 | n/a | 4 | 0.738618226 | 43 |
| SODIUM SULFATE                         | C0074769 | 6.19E-03 | n/a | 4 | 0.738618226 | 43 |
| DIFFERENTIATION INHIBITOR              | C1511940 | 6.72E-03 | n/a | 4 | 0.755795394 | 44 |
| ANTI ALLERGIC AGENTS                   | C0282555 | 6.72E-03 | n/a | 4 | 0.755795394 | 44 |
| GLYCYRRHETINIC ACID                    | C0017986 | 7.28E-03 | n/a | 4 | 0.772972562 | 45 |
| CETIRIZINE                             | C0055147 | 7.28E-03 | n/a | 4 | 0.772972562 | 45 |
| EDETIC ACID                            | C0013618 | 7.87E-03 | n/a | 4 | 0.79014973  | 46 |
| COLCEMIDE                              | C0813866 | 7.87E-03 | n/a | 4 | 0.79014973  | 46 |
| PIRFENIDONE                            | C0298067 | 7.87E-03 | n/a | 4 | 0.79014973  | 46 |
| RH1 BENZOQUINONE                       | C0764430 | 7.87E-03 | n/a | 4 | 0.79014973  | 46 |
| CICAPROST                              | C0055705 | 8.48E-03 | n/a | 4 | 0.807326898 | 47 |
| EFALIZUMAB                             | C1174995 | 8.48E-03 | n/a | 4 | 0.807326898 | 47 |
| ETHACRYNIC ACID                        | C0014963 | 9.13E-03 | n/a | 4 | 0.824504066 | 48 |
| 9,10 ANTHRAQUINONE                     | C0050133 | 9.13E-03 | n/a | 4 | 0.824504066 | 48 |
| PROTAMINE SULPHATE                     | C0033602 | 9.13E-03 | n/a | 4 | 0.824504066 | 48 |
| TOCILIZUMAB                            | C1609165 | 9.13E-03 | n/a | 4 | 0.824504066 | 48 |
| RECOMBINANT FIBROBLAST GROWTH FACTOR 1 | C1522455 | 9.13E-03 | n/a | 4 | 0.824504066 | 48 |
| WITHA FERIN A                          | C0078503 | 9.81E-03 | n/a | 4 | 0.841681234 | 49 |
| COMPOUND 48 80                         | C0009574 | 9.81E-03 | n/a | 4 | 0.841681234 | 49 |
| 5 CHLORO 2 METHYL 4 ISOTHIAZOLIN 3 ONE | C0049104 | 1.97E-05 | n/a | 3 | 0.068708672 | 4  |
| PHOTOALLERGEN                          | C0440108 | 1.97E-05 | n/a | 3 | 0.068708672 | 4  |
| ONO 6818                               | C0963626 | 1.97E-05 | n/a | 3 | 0.068708672 | 4  |
| IMMLG5521                              | C3254304 | 4.88E-05 | n/a | 3 | 0.08588584  | 5  |
| HAMAMELITANNIN                         | C0297195 | 4.88E-05 | n/a | 3 | 0.08588584  | 5  |
| LEUKADHERIN 1                          | C3851799 | 4.88E-05 | n/a | 3 | 0.08588584  | 5  |
| PINANE                                 | C0071079 | 4.88E-05 | n/a | 3 | 0.08588584  | 5  |
| 1,2,5 THIADIAZOLIDIN 3 ONE 1,1 DIOXIDE | C0966875 | 4.88E-05 | n/a | 3 | 0.08588584  | 5  |
| TYRPHOSTIN AG 1288                     | C1519731 | 9.63E-05 | n/a | 3 | 0.103063008 | 6  |
| AH 13205                               | C0215899 | 9.63E-05 | n/a | 3 | 0.103063008 | 6  |
| TILMICOSIN                             | C0076681 | 1.66E-04 | n/a | 3 | 0.120240176 | 7  |
| LIPOSOMAL CURCUMIN                     | C3898588 | 2.63E-04 | n/a | 3 | 0.137417344 | 8  |
| PROLASTIN                              | C0701947 | 2.63E-04 | n/a | 3 | 0.137417344 | 8  |
| DIMEMORFAN                             | C0058193 | 2.63E-04 | n/a | 3 | 0.137417344 | 8  |
| FK 706                                 | C0669496 | 3.89E-04 | n/a | 3 | 0.154594512 | 9  |
| EMEDASTINE                             | C0064263 | 3.89E-04 | n/a | 3 | 0.154594512 | 9  |

|                                        |          |          |     |   |             |    |
|----------------------------------------|----------|----------|-----|---|-------------|----|
| NPC 15669                              | C0132918 | 3.89E-04 | n/a | 3 | 0.154594512 | 9  |
| SAXATILIN                              | C1137277 | 5.49E-04 | n/a | 3 | 0.17177168  | 10 |
| Y 24180                                | C0149072 | 5.49E-04 | n/a | 3 | 0.17177168  | 10 |
| LASALOCID                              | C0023082 | 7.45E-04 | n/a | 3 | 0.188948849 | 11 |
| CADEXOMER IODINE                       | C0054409 | 7.45E-04 | n/a | 3 | 0.188948849 | 11 |
| PCB 104                                | C1453501 | 7.45E-04 | n/a | 3 | 0.188948849 | 11 |
| ASPERGILLUS FUMIGATUS EXTRACT          | C1445421 | 7.45E-04 | n/a | 3 | 0.188948849 | 11 |
| DORNASE ALFA                           | C1135662 | 9.81E-04 | n/a | 3 | 0.206126017 | 12 |
| ALPHA TYPE 1 POLARIZED DENDRITIC CELLS | C1831973 | 9.81E-04 | n/a | 3 | 0.206126017 | 12 |
| TAPROSTENE                             | C0075812 | 9.81E-04 | n/a | 3 | 0.206126017 | 12 |
| MZM                                    | C0721501 | 9.81E-04 | n/a | 3 | 0.206126017 | 12 |
| PHENYL BUTYRATE                        | C3848590 | 9.81E-04 | n/a | 3 | 0.206126017 | 12 |
| SC 41930                               | C0074112 | 9.81E-04 | n/a | 3 | 0.206126017 | 12 |
| CYCLOSPORIN H                          | C0056823 | 9.81E-04 | n/a | 3 | 0.206126017 | 12 |
| REPARIXIN                              | C1506748 | 1.26E-03 | n/a | 3 | 0.223303185 | 13 |
| ISIS 2302                              | C3495448 | 1.26E-03 | n/a | 3 | 0.223303185 | 13 |
| INDOLICIDIN                            | C0123515 | 1.26E-03 | n/a | 3 | 0.223303185 | 13 |
| METHYL SALICYLATE                      | C0066282 | 1.26E-03 | n/a | 3 | 0.223303185 | 13 |
| MEDICARPIN                             | C0065857 | 1.26E-03 | n/a | 3 | 0.223303185 | 13 |
| HARPAGOSIDE                            | C0062127 | 1.58E-03 | n/a | 3 | 0.240480353 | 14 |
| SHOSAIKO TO                            | C1138004 | 1.58E-03 | n/a | 3 | 0.240480353 | 14 |
| CV 3988                                | C0056625 | 1.58E-03 | n/a | 3 | 0.240480353 | 14 |
| ONO AE1 329                            | C1138034 | 1.95E-03 | n/a | 3 | 0.257657521 | 15 |
| FLUNISOLIDE                            | C0060501 | 1.95E-03 | n/a | 3 | 0.257657521 | 15 |
| SOFALCONE                              | C0142971 | 1.95E-03 | n/a | 3 | 0.257657521 | 15 |
| FLUNIXIN MEGLUMINE                     | C0060503 | 1.95E-03 | n/a | 3 | 0.257657521 | 15 |
| N DODECANE                             | C0067942 | 2.37E-03 | n/a | 3 | 0.274834689 | 16 |
| ACETATE                                | C0000975 | 2.37E-03 | n/a | 3 | 0.274834689 | 16 |
| ASPHALT                                | C0052558 | 2.37E-03 | n/a | 3 | 0.274834689 | 16 |
| ACETATES                               | C0000979 | 2.37E-03 | n/a | 3 | 0.274834689 | 16 |
| TAUROLIDINE                            | C0144567 | 2.37E-03 | n/a | 3 | 0.274834689 | 16 |
| WEB 2170                               | C0085001 | 2.37E-03 | n/a | 3 | 0.274834689 | 16 |
| LORNOXICAM                             | C0055477 | 2.37E-03 | n/a | 3 | 0.274834689 | 16 |
| FLUORANTHENE                           | C0060514 | 2.37E-03 | n/a | 3 | 0.274834689 | 16 |
| GAMMA INTERFERON                       | C3539881 | 2.85E-03 | n/a | 3 | 0.292011857 | 17 |
| COMPSTATIN                             | C0673968 | 2.85E-03 | n/a | 3 | 0.292011857 | 17 |
| PIDOTIMOD                              | C0081002 | 2.85E-03 | n/a | 3 | 0.292011857 | 17 |
| HUMAN NEUTROPHIL PEPTIDE 1             | C0122620 | 2.85E-03 | n/a | 3 | 0.292011857 | 17 |
| N METHYLFORMAMIDE                      | C0066373 | 3.37E-03 | n/a | 3 | 0.309189025 | 18 |
| AMINONUCLEOSIDE                        | C0085791 | 3.37E-03 | n/a | 3 | 0.309189025 | 18 |
| CARBOCYSTEINE                          | C0006992 | 3.37E-03 | n/a | 3 | 0.309189025 | 18 |
| HEXAMINE SILVER                        | C0037128 | 3.37E-03 | n/a | 3 | 0.309189025 | 18 |
| OXATOMIDE                              | C0134337 | 3.37E-03 | n/a | 3 | 0.309189025 | 18 |
| AMETANTRONE                            | C0102923 | 3.37E-03 | n/a | 3 | 0.309189025 | 18 |

|                            |          |          |     |   |             |    |
|----------------------------|----------|----------|-----|---|-------------|----|
| CREST                      | C2948667 | 3.95E-03 | n/a | 3 | 0.326366193 | 19 |
| PLATONIN                   | C0137287 | 3.95E-03 | n/a | 3 | 0.326366193 | 19 |
| CEP 11004                  | C1172647 | 3.95E-03 | n/a | 3 | 0.326366193 | 19 |
| BUTANE                     | C0006474 | 3.95E-03 | n/a | 3 | 0.326366193 | 19 |
| SUCCINIMIDE                | C0075432 | 3.95E-03 | n/a | 3 | 0.326366193 | 19 |
| ACECLOFENAC                | C0050403 | 3.95E-03 | n/a | 3 | 0.326366193 | 19 |
| HELENALIN                  | C0062169 | 3.95E-03 | n/a | 3 | 0.326366193 | 19 |
| TETRAGASTRIN               | C0039659 | 3.95E-03 | n/a | 3 | 0.326366193 | 19 |
| TRP P 1                    | C0077413 | 3.95E-03 | n/a | 3 | 0.326366193 | 19 |
| CORILAGIN                  | C0164514 | 3.95E-03 | n/a | 3 | 0.326366193 | 19 |
| CLEMASTINE                 | C0008929 | 3.95E-03 | n/a | 3 | 0.326366193 | 19 |
| OM 85 BV                   | C0163642 | 4.59E-03 | n/a | 3 | 0.343543361 | 20 |
| SUCCINIMIDES               | C0038623 | 4.59E-03 | n/a | 3 | 0.343543361 | 20 |
| SR 11302                   | C0539455 | 4.59E-03 | n/a | 3 | 0.343543361 | 20 |
| ANTIPYRETICS               | C0003419 | 4.59E-03 | n/a | 3 | 0.343543361 | 20 |
| IRRIGATION SOLUTIONS       | C2746010 | 4.59E-03 | n/a | 3 | 0.343543361 | 20 |
| CALCIUM PHOSPHATE CRYSTALS | C0368819 | 5.29E-03 | n/a | 3 | 0.360720529 | 21 |
| POLYETHYLENE GLYCOL 8000   | C0030776 | 5.29E-03 | n/a | 3 | 0.360720529 | 21 |
| SU 6668                    | C0970963 | 5.29E-03 | n/a | 3 | 0.360720529 | 21 |
| LIPOCALIN 1                | C0078147 | 6.05E-03 | n/a | 3 | 0.377897697 | 22 |
| MOLGRAMOSTIM               | C0218633 | 6.05E-03 | n/a | 3 | 0.377897697 | 22 |
| GOLD SODIUM THIOMALATE     | C0018034 | 6.05E-03 | n/a | 3 | 0.377897697 | 22 |
| MONOASPARTYL CHLORIN E6    | C0245194 | 6.05E-03 | n/a | 3 | 0.377897697 | 22 |
| TALL 104                   | C1832043 | 6.05E-03 | n/a | 3 | 0.377897697 | 22 |
| DIPIVEFRIN                 | C0058415 | 6.05E-03 | n/a | 3 | 0.377897697 | 22 |
| HUMAN NEUTROPHIL PEPTIDE 2 | C0122159 | 6.05E-03 | n/a | 3 | 0.377897697 | 22 |
| SODIUM IODATE              | C0074742 | 6.05E-03 | n/a | 3 | 0.377897697 | 22 |
| ONC201                     | C3827072 | 6.87E-03 | n/a | 3 | 0.395074865 | 23 |
| OLEANDRIN                  | C0069397 | 6.87E-03 | n/a | 3 | 0.395074865 | 23 |
| BONGKREKIC ACID            | C0005982 | 6.87E-03 | n/a | 3 | 0.395074865 | 23 |
| FR 167653                  | C0535734 | 6.87E-03 | n/a | 3 | 0.395074865 | 23 |
| NAFAMOSTAT MESILATE        | C0207682 | 6.87E-03 | n/a | 3 | 0.395074865 | 23 |
| SULPROSTONE                | C0075628 | 6.87E-03 | n/a | 3 | 0.395074865 | 23 |
| RO 31 8425                 | C0140783 | 6.87E-03 | n/a | 3 | 0.395074865 | 23 |
| ANGIOTENSIN II             | C0003009 | 6.87E-03 | n/a | 3 | 0.395074865 | 23 |
| DAMNACANTHAL               | C0212399 | 6.87E-03 | n/a | 3 | 0.395074865 | 23 |
| COMPOUND 32                | C0258113 | 7.75E-03 | n/a | 3 | 0.412252033 | 24 |
| ECHINOMYCIN                | C0013508 | 7.75E-03 | n/a | 3 | 0.412252033 | 24 |
| ANTIMETASTATIC AGENT       | C1516021 | 7.75E-03 | n/a | 3 | 0.412252033 | 24 |
| DALTEPARIN                 | C0206461 | 7.75E-03 | n/a | 3 | 0.412252033 | 24 |
| CMT 3                      | C2979988 | 7.75E-03 | n/a | 3 | 0.412252033 | 24 |
| MANIDIPINE                 | C0065656 | 7.75E-03 | n/a | 3 | 0.412252033 | 24 |
| MURAMIDASE                 | C0026794 | 8.70E-03 | n/a | 3 | 0.429429201 | 25 |
| RHUBARB PREPARATION        | C0304561 | 8.70E-03 | n/a | 3 | 0.429429201 | 25 |

|                                           |          |          |     |   |             |    |
|-------------------------------------------|----------|----------|-----|---|-------------|----|
| MRS 2179                                  | C0674169 | 8.70E-03 | n/a | 3 | 0.429429201 | 25 |
| CLI 095                                   | C3179438 | 8.70E-03 | n/a | 3 | 0.429429201 | 25 |
| NF 449                                    | C0670517 | 8.70E-03 | n/a | 3 | 0.429429201 | 25 |
| TERBINAFINE                               | C0076110 | 8.70E-03 | n/a | 3 | 0.429429201 | 25 |
| CCI 779                                   | C0796512 | 8.70E-03 | n/a | 3 | 0.429429201 | 25 |
| PYCNOGENOL                                | C0072642 | 9.72E-03 | n/a | 3 | 0.446606369 | 26 |
| 4 COUMARIC ACID                           | C0048207 | 9.72E-03 | n/a | 3 | 0.446606369 | 26 |
| GALIXIMAB                                 | C1098262 | 9.72E-03 | n/a | 3 | 0.446606369 | 26 |
| PYCNOGENOLS                               | C1616563 | 9.72E-03 | n/a | 3 | 0.446606369 | 26 |
| XMD 8 92                                  | C3252765 | 9.72E-03 | n/a | 3 | 0.446606369 | 26 |
| LGD 1069                                  | C0300770 | 9.72E-03 | n/a | 3 | 0.446606369 | 26 |
| CECROPINS                                 | C0597874 | 9.72E-03 | n/a | 3 | 0.446606369 | 26 |
| DAK 16                                    | C0112273 | 2.94E-04 | n/a | 2 | 0.034354336 | 2  |
| FLECAINIDE ACETATE                        | C0086303 | 2.94E-04 | n/a | 2 | 0.034354336 | 2  |
| 1 PHENAZINECARBOXYLIC ACID                | C0044583 | 2.94E-04 | n/a | 2 | 0.034354336 | 2  |
| YM 47141                                  | C0386137 | 2.94E-04 | n/a | 2 | 0.034354336 | 2  |
| P 1507                                    | C0297250 | 2.94E-04 | n/a | 2 | 0.034354336 | 2  |
| REPANDOSIDE                               | C2934769 | 2.94E-04 | n/a | 2 | 0.034354336 | 2  |
| KN 04                                     | C0378618 | 8.66E-04 | n/a | 2 | 0.051531504 | 3  |
| MUTEIN 6                                  | C0538992 | 8.66E-04 | n/a | 2 | 0.051531504 | 3  |
| L 658758                                  | C0083171 | 8.66E-04 | n/a | 2 | 0.051531504 | 3  |
| BDPT                                      | C0644698 | 8.66E-04 | n/a | 2 | 0.051531504 | 3  |
| ASCARIDOLE                                | C0052466 | 8.66E-04 | n/a | 2 | 0.051531504 | 3  |
| AGRIMONIIN                                | C0050985 | 8.66E-04 | n/a | 2 | 0.051531504 | 3  |
| 6 HYDROXY 2,4,7 TRIMETHOXYPHENANTHRENE    | C3253438 | 8.66E-04 | n/a | 2 | 0.051531504 | 3  |
| LIPEGFILGRASTIM                           | C3640212 | 8.66E-04 | n/a | 2 | 0.051531504 | 3  |
| TMI 1                                     | C1456763 | 8.66E-04 | n/a | 2 | 0.051531504 | 3  |
| HESPERIDIN METHYL CHALONE                 | C2350707 | 8.66E-04 | n/a | 2 | 0.051531504 | 3  |
| MDL 101028                                | C0291761 | 8.66E-04 | n/a | 2 | 0.051531504 | 3  |
| 3' CHLORO 5,7 DIMETHOXYISOFLAVONE         | C3491366 | 8.66E-04 | n/a | 2 | 0.051531504 | 3  |
| RACTOPAMINE HYDROCHLORIDE                 | C0958044 | 1.72E-03 | n/a | 2 | 0.068708672 | 4  |
| NITROFLURBIPROFEN                         | C0381496 | 1.72E-03 | n/a | 2 | 0.068708672 | 4  |
| RECOMBINANT CTAP III                      | C1523977 | 1.72E-03 | n/a | 2 | 0.068708672 | 4  |
| POLUDAN                                   | C0071336 | 1.72E-03 | n/a | 2 | 0.068708672 | 4  |
| AM6 36                                    | C3177627 | 1.72E-03 | n/a | 2 | 0.068708672 | 4  |
| ISIS 2922                                 | C0950924 | 1.72E-03 | n/a | 2 | 0.068708672 | 4  |
| PROSOM                                    | C0722865 | 1.72E-03 | n/a | 2 | 0.068708672 | 4  |
| RK I 123                                  | C3714162 | 1.72E-03 | n/a | 2 | 0.068708672 | 4  |
| POLYHEXAMETHYLENE BIGUANIDE               | C0137794 | 1.72E-03 | n/a | 2 | 0.068708672 | 4  |
| ACETYL AMVSEFLKQAWIENEEQYVVQTVK           | C0382612 | 1.72E-03 | n/a | 2 | 0.068708672 | 4  |
| HWA 138                                   | C0063039 | 1.72E-03 | n/a | 2 | 0.068708672 | 4  |
| GLUTAMYL GLYCYL ARGINYL CHLOROMETHYL KETI | C0252794 | 1.72E-03 | n/a | 2 | 0.068708672 | 4  |
| GLYCYL PROLYL ARGININE                    | C0061724 | 1.72E-03 | n/a | 2 | 0.068708672 | 4  |
| SANTONIN RELATED COMPOUND 2               | C3657379 | 1.72E-03 | n/a | 2 | 0.068708672 | 4  |

|                                  |          |          |     |   |             |   |
|----------------------------------|----------|----------|-----|---|-------------|---|
| PD 098063                        | C0533563 | 1.72E-03 | n/a | 2 | 0.068708672 | 4 |
| RP 55778                         | C0140881 | 1.72E-03 | n/a | 2 | 0.068708672 | 4 |
| RHESUS ROTAVIRUS VACCINE         | C0140933 | 1.72E-03 | n/a | 2 | 0.068708672 | 4 |
| ON09310                          | C2353771 | 1.72E-03 | n/a | 2 | 0.068708672 | 4 |
| AW00179                          | C3661253 | 1.72E-03 | n/a | 2 | 0.068708672 | 4 |
| IRFI 042                         | C0971022 | 1.72E-03 | n/a | 2 | 0.068708672 | 4 |
| BIIL 284                         | C0972319 | 1.72E-03 | n/a | 2 | 0.068708672 | 4 |
| GLIOVIRIN                        | C0061326 | 1.72E-03 | n/a | 2 | 0.068708672 | 4 |
| NPB001 05                        | C3253929 | 1.72E-03 | n/a | 2 | 0.068708672 | 4 |
| BB 2275                          | C0257712 | 1.72E-03 | n/a | 2 | 0.068708672 | 4 |
| RO 23 9424                       | C0073515 | 1.72E-03 | n/a | 2 | 0.068708672 | 4 |
| IMUNOFAN                         | C0379865 | 1.72E-03 | n/a | 2 | 0.068708672 | 4 |
| BVT173187                        | C3492858 | 1.72E-03 | n/a | 2 | 0.068708672 | 4 |
| BECLOMETHASONE 17 MONOPROPIONATE | C0081729 | 1.72E-03 | n/a | 2 | 0.068708672 | 4 |
| 2 METHYL 4 ISOTHIAZOLIN 3 ONE    | C0046343 | 1.72E-03 | n/a | 2 | 0.068708672 | 4 |
| ALPHA HEXYLCINNAMALDEHYDE        | C2935868 | 1.72E-03 | n/a | 2 | 0.068708672 | 4 |
| FUSIDATE SODIUM                  | C0037509 | 2.84E-03 | n/a | 2 | 0.08588584  | 5 |
| MALTOTETRAOSE                    | C0065615 | 2.84E-03 | n/a | 2 | 0.08588584  | 5 |
| POLYMYXIN B SULFATE              | C0001714 | 2.84E-03 | n/a | 2 | 0.08588584  | 5 |
| BUTRIN                           | C0627897 | 2.84E-03 | n/a | 2 | 0.08588584  | 5 |
| DIPHThERIA TETANUS TOXOIDS       | C0717715 | 2.84E-03 | n/a | 2 | 0.08588584  | 5 |
| CSL 32                           | C3502702 | 2.84E-03 | n/a | 2 | 0.08588584  | 5 |
| ISOBUTRIN                        | C0627895 | 2.84E-03 | n/a | 2 | 0.08588584  | 5 |
| TRIFLUOPERAZINE HYDROCHLORIDE    | C0304381 | 2.84E-03 | n/a | 2 | 0.08588584  | 5 |
| YAKUCHINONE A                    | C0078676 | 2.84E-03 | n/a | 2 | 0.08588584  | 5 |
| ONOPORDUM EXTRACT                | C3486813 | 2.84E-03 | n/a | 2 | 0.08588584  | 5 |
| SODIUM ASCORBYL PHOSPHATE        | C1814855 | 2.84E-03 | n/a | 2 | 0.08588584  | 5 |
| VINYL ETHER                      | C0078264 | 2.84E-03 | n/a | 2 | 0.08588584  | 5 |
| SALICIN EXTRACT                  | C0874039 | 2.84E-03 | n/a | 2 | 0.08588584  | 5 |
| PLANTAGO LANCEOLATA LEAF EXTRACT | C3256432 | 2.84E-03 | n/a | 2 | 0.08588584  | 5 |
| AZADIRONE                        | C1453317 | 2.84E-03 | n/a | 2 | 0.08588584  | 5 |
| CEPHAMYCINS                      | C0007736 | 2.84E-03 | n/a | 2 | 0.08588584  | 5 |
| OHIOENSIN F                      | C2353874 | 2.84E-03 | n/a | 2 | 0.08588584  | 5 |
| PAPCX                            | C0043958 | 2.84E-03 | n/a | 2 | 0.08588584  | 5 |
| PARTHENIUM HYSTEROPHORUS EXTRACT | C1956630 | 2.84E-03 | n/a | 2 | 0.08588584  | 5 |
| OLODATEROL                       | C2934193 | 2.84E-03 | n/a | 2 | 0.08588584  | 5 |
| CT 1501R                         | C0243901 | 2.84E-03 | n/a | 2 | 0.08588584  | 5 |
| F 4614                           | C0384949 | 2.84E-03 | n/a | 2 | 0.08588584  | 5 |
| MABTHERA                         | C1314901 | 2.84E-03 | n/a | 2 | 0.08588584  | 5 |
| HYPOTHIOCYANITE                  | C0122932 | 2.84E-03 | n/a | 2 | 0.08588584  | 5 |
| SDZ MRL 953                      | C0141826 | 2.84E-03 | n/a | 2 | 0.08588584  | 5 |
| CP 195543                        | C0676002 | 2.84E-03 | n/a | 2 | 0.08588584  | 5 |
| DIGITOXIGENIN                    | C0012257 | 2.84E-03 | n/a | 2 | 0.08588584  | 5 |
| CDP 571                          | C0910864 | 2.84E-03 | n/a | 2 | 0.08588584  | 5 |

|                              |          |          |     |   |             |   |
|------------------------------|----------|----------|-----|---|-------------|---|
| CDP870                       | C1172157 | 2.84E-03 | n/a | 2 | 0.08588584  | 5 |
| MR 889                       | C0066861 | 2.84E-03 | n/a | 2 | 0.08588584  | 5 |
| PF 04418948                  | C3490773 | 2.84E-03 | n/a | 2 | 0.08588584  | 5 |
| BUDLEIN A                    | C1957519 | 2.84E-03 | n/a | 2 | 0.08588584  | 5 |
| CI 949                       | C0055696 | 2.84E-03 | n/a | 2 | 0.08588584  | 5 |
| NAPROXEN N BUTYL NITRATE     | C0673815 | 2.84E-03 | n/a | 2 | 0.08588584  | 5 |
| SOLITHROMYCIN                | C3655918 | 2.84E-03 | n/a | 2 | 0.08588584  | 5 |
| PD 144795                    | C0381400 | 4.21E-03 | n/a | 2 | 0.103063008 | 6 |
| SALICORTIN                   | C0676660 | 4.21E-03 | n/a | 2 | 0.103063008 | 6 |
| 3 DEOXSAPPANCHALCONE         | C2717294 | 4.21E-03 | n/a | 2 | 0.103063008 | 6 |
| RETINYL RETINOATE            | C2354879 | 4.21E-03 | n/a | 2 | 0.103063008 | 6 |
| TYRPHOSTIN AG 126            | C1435212 | 4.21E-03 | n/a | 2 | 0.103063008 | 6 |
| PIMARIC ACID                 | C0071065 | 4.21E-03 | n/a | 2 | 0.103063008 | 6 |
| OC000459                     | C3491265 | 4.21E-03 | n/a | 2 | 0.103063008 | 6 |
| ALLERGINA                    | C1172086 | 4.21E-03 | n/a | 2 | 0.103063008 | 6 |
| VTX 294                      | C3713619 | 4.21E-03 | n/a | 2 | 0.103063008 | 6 |
| DIOSMECTITE                  | C0163748 | 4.21E-03 | n/a | 2 | 0.103063008 | 6 |
| AH 23848B                    | C0101892 | 4.21E-03 | n/a | 2 | 0.103063008 | 6 |
| PYRANOPROFEN                 | C0072652 | 4.21E-03 | n/a | 2 | 0.103063008 | 6 |
| CV 159                       | C0056620 | 4.21E-03 | n/a | 2 | 0.103063008 | 6 |
| ONO AP 324                   | C0764633 | 4.21E-03 | n/a | 2 | 0.103063008 | 6 |
| LEX 032                      | C0381874 | 4.21E-03 | n/a | 2 | 0.103063008 | 6 |
| SEPTILIN                     | C0074359 | 4.21E-03 | n/a | 2 | 0.103063008 | 6 |
| TEA TREE OIL                 | C0216194 | 4.21E-03 | n/a | 2 | 0.103063008 | 6 |
| IMMOTHER                     | C0281671 | 4.21E-03 | n/a | 2 | 0.103063008 | 6 |
| BRAIN NATRIURETIC PEPTIDE 45 | C0107094 | 4.21E-03 | n/a | 2 | 0.103063008 | 6 |
| CG100649                     | C4042958 | 4.21E-03 | n/a | 2 | 0.103063008 | 6 |
| SC 58635                     | C0538926 | 4.21E-03 | n/a | 2 | 0.103063008 | 6 |
| ELLA                         | C2927379 | 4.21E-03 | n/a | 2 | 0.103063008 | 6 |
| CSY 0073                     | C3252427 | 4.21E-03 | n/a | 2 | 0.103063008 | 6 |
| BRL 50481                    | C1566895 | 4.21E-03 | n/a | 2 | 0.103063008 | 6 |
| T ACTIVIN                    | C0075727 | 4.21E-03 | n/a | 2 | 0.103063008 | 6 |
| NNKOAC                       | C0216823 | 4.21E-03 | n/a | 2 | 0.103063008 | 6 |
| PINE BARK EXTRACT            | C0872909 | 4.21E-03 | n/a | 2 | 0.103063008 | 6 |
| HOCHU EKKI TO                | C0911380 | 4.21E-03 | n/a | 2 | 0.103063008 | 6 |
| 2,3 DIHYDROXYBENZOIC ACID    | C0046544 | 4.21E-03 | n/a | 2 | 0.103063008 | 6 |
| SC 10                        | C0173244 | 4.21E-03 | n/a | 2 | 0.103063008 | 6 |
| CI 959                       | C0055699 | 4.21E-03 | n/a | 2 | 0.103063008 | 6 |
| 7 OME APBT                   | C4077637 | 5.82E-03 | n/a | 2 | 0.120240176 | 7 |
| SB 656933                    | C3254571 | 5.82E-03 | n/a | 2 | 0.120240176 | 7 |
| GLUCOSAMINE                  | C0017718 | 5.82E-03 | n/a | 2 | 0.120240176 | 7 |
| NOC 7                        | C0759114 | 5.82E-03 | n/a | 2 | 0.120240176 | 7 |
| CAELYX                       | C0701183 | 5.82E-03 | n/a | 2 | 0.120240176 | 7 |
| ACTARIT                      | C0378042 | 5.82E-03 | n/a | 2 | 0.120240176 | 7 |



|                                         |          |          |     |   |             |   |
|-----------------------------------------|----------|----------|-----|---|-------------|---|
| XANTHOTOXOL                             | C0207281 | 5.82E-03 | n/a | 2 | 0.120240176 | 7 |
| ARACHIDONATE 12 LIPOXYGENASE INHIBITORS | C2936662 | 5.82E-03 | n/a | 2 | 0.120240176 | 7 |
| INDOXAM                                 | C0767967 | 5.82E-03 | n/a | 2 | 0.120240176 | 7 |
| LONOMYCIN                               | C0065176 | 5.82E-03 | n/a | 2 | 0.120240176 | 7 |
| VETERINARY DRUGS                        | C0376438 | 5.82E-03 | n/a | 2 | 0.120240176 | 7 |
| HUMIRA                                  | C1171255 | 5.82E-03 | n/a | 2 | 0.120240176 | 7 |
| MGN1703                                 | C2986392 | 5.82E-03 | n/a | 2 | 0.120240176 | 7 |
| HUMAN LEUKOCYTE ELASTASE INHIBITOR      | C0379422 | 5.82E-03 | n/a | 2 | 0.120240176 | 7 |
| IRSOGLADINE MALEATE                     | C0091573 | 5.82E-03 | n/a | 2 | 0.120240176 | 7 |
| ECABET SODIUM                           | C0378416 | 5.82E-03 | n/a | 2 | 0.120240176 | 7 |
| CHLOROPROCAINE                          | C0055443 | 5.82E-03 | n/a | 2 | 0.120240176 | 7 |
| MDX H210 ANTIBODY                       | C0281736 | 5.82E-03 | n/a | 2 | 0.120240176 | 7 |
| BROMIDE ION                             | C3848571 | 5.82E-03 | n/a | 2 | 0.120240176 | 7 |
| BERBERRUBINE                            | C0760606 | 5.82E-03 | n/a | 2 | 0.120240176 | 7 |
| BEMIPARIN                               | C0916062 | 5.82E-03 | n/a | 2 | 0.120240176 | 7 |
| CLADOSPORIUM HERBARUM EXTRACT           | C1445427 | 5.82E-03 | n/a | 2 | 0.120240176 | 7 |
| CNCM                                    | C0633185 | 5.82E-03 | n/a | 2 | 0.120240176 | 7 |
| ANGIOGEN                                | C1172713 | 5.82E-03 | n/a | 2 | 0.120240176 | 7 |
| ARACHIDONATE 15 LIPOXYGENASE INHIBITORS | C2936663 | 5.82E-03 | n/a | 2 | 0.120240176 | 7 |
| MUR NAC L ALA D ISOGLN                  | C0086659 | 5.82E-03 | n/a | 2 | 0.120240176 | 7 |
| CHLOROACETIC ACID                       | C0008225 | 5.82E-03 | n/a | 2 | 0.120240176 | 7 |
| DALFOPRISTIN /QUINUPRISTIN              | C0526513 | 5.82E-03 | n/a | 2 | 0.120240176 | 7 |
| PROCYANIDIN B1                          | C0890082 | 5.82E-03 | n/a | 2 | 0.120240176 | 7 |
| HEXTEND                                 | C1170317 | 5.82E-03 | n/a | 2 | 0.120240176 | 7 |
| ADENOSINE A3 RECEPTOR AGONIST CF102     | C0289969 | 5.82E-03 | n/a | 2 | 0.120240176 | 7 |
| RU24858                                 | C3852127 | 7.68E-03 | n/a | 2 | 0.137417344 | 8 |
| CEPROTIN                                | C1949898 | 7.68E-03 | n/a | 2 | 0.137417344 | 8 |
| DIPHENYLIODONIUM CHLORIDE               | C0955122 | 7.68E-03 | n/a | 2 | 0.137417344 | 8 |
| BEPOTASTINE                             | C2698371 | 7.68E-03 | n/a | 2 | 0.137417344 | 8 |
| KELATORPHAN                             | C0064276 | 7.68E-03 | n/a | 2 | 0.137417344 | 8 |
| ROMURTIDE                               | C0067246 | 7.68E-03 | n/a | 2 | 0.137417344 | 8 |
| U 74389G                                | C0252126 | 7.68E-03 | n/a | 2 | 0.137417344 | 8 |
| DENBUFYLLINE                            | C0057384 | 7.68E-03 | n/a | 2 | 0.137417344 | 8 |
| CORN SILK PREPARATION                   | C0937769 | 7.68E-03 | n/a | 2 | 0.137417344 | 8 |
| 6 CHLORO 2',3' DIDEOXYGUANOSINE         | C0381855 | 7.68E-03 | n/a | 2 | 0.137417344 | 8 |
| 2,2',4,6,6' PENTACHLOROBIPHENYL         | C0962700 | 7.68E-03 | n/a | 2 | 0.137417344 | 8 |
| SALIX                                   | C1815865 | 7.68E-03 | n/a | 2 | 0.137417344 | 8 |
| CALCOFLUOR WHITE                        | C0108160 | 7.68E-03 | n/a | 2 | 0.137417344 | 8 |
| U 74389F                                | C0168928 | 7.68E-03 | n/a | 2 | 0.137417344 | 8 |
| 3,3',4',5 TETRACHLOROSALICYLANILIDE     | C0046874 | 7.68E-03 | n/a | 2 | 0.137417344 | 8 |
| PD IA                                   | C0259505 | 7.68E-03 | n/a | 2 | 0.137417344 | 8 |
| GSK2656157                              | C4044483 | 7.68E-03 | n/a | 2 | 0.137417344 | 8 |
| PURINERGIC P2 RECEPTOR AGONISTS         | C2936554 | 7.68E-03 | n/a | 2 | 0.137417344 | 8 |
| ENNIATIN B                              | C0116183 | 7.68E-03 | n/a | 2 | 0.137417344 | 8 |

|                                                  |          |          |     |   |             |   |
|--------------------------------------------------|----------|----------|-----|---|-------------|---|
| DESIRUDIN                                        | C0378366 | 7.68E-03 | n/a | 2 | 0.137417344 | 8 |
| JM 34                                            | C0382648 | 7.68E-03 | n/a | 2 | 0.137417344 | 8 |
| BXT 51072                                        | C0757964 | 7.68E-03 | n/a | 2 | 0.137417344 | 8 |
| BAY 73 6691                                      | C1674022 | 7.68E-03 | n/a | 2 | 0.137417344 | 8 |
| HUMULON                                          | C0063031 | 7.68E-03 | n/a | 2 | 0.137417344 | 8 |
| VERTICILLIN A                                    | C0952065 | 7.68E-03 | n/a | 2 | 0.137417344 | 8 |
| CREBANINE                                        | C0056473 | 7.68E-03 | n/a | 2 | 0.137417344 | 8 |
| NARASIN                                          | C0068443 | 7.68E-03 | n/a | 2 | 0.137417344 | 8 |
| SECURININE                                       | C0074259 | 7.68E-03 | n/a | 2 | 0.137417344 | 8 |
| SIM 010603                                       | C3490196 | 7.68E-03 | n/a | 2 | 0.137417344 | 8 |
| KJE                                              | C0171293 | 7.68E-03 | n/a | 2 | 0.137417344 | 8 |
| DIFID                                            | C3490744 | 7.68E-03 | n/a | 2 | 0.137417344 | 8 |
| XL184                                            | C1710686 | 7.68E-03 | n/a | 2 | 0.137417344 | 8 |
| CEVIMELINE                                       | C0093437 | 7.68E-03 | n/a | 2 | 0.137417344 | 8 |
| MVA 85A                                          | C2933874 | 7.68E-03 | n/a | 2 | 0.137417344 | 8 |
| JTE 607                                          | C1172246 | 9.77E-03 | n/a | 2 | 0.154594512 | 9 |
| PROXIGERMANIUM                                   | C0081913 | 9.77E-03 | n/a | 2 | 0.154594512 | 9 |
| ENPROSTIL                                        | C0085191 | 9.77E-03 | n/a | 2 | 0.154594512 | 9 |
| WOBE MUGOS E                                     | C0935809 | 9.77E-03 | n/a | 2 | 0.154594512 | 9 |
| TRIAZOLODIAZEPINE                                | C0245118 | 9.77E-03 | n/a | 2 | 0.154594512 | 9 |
| TOCOPHEROL ACETATE                               | C0078373 | 9.77E-03 | n/a | 2 | 0.154594512 | 9 |
| POLYPHENON E                                     | C0917976 | 9.77E-03 | n/a | 2 | 0.154594512 | 9 |
| PENTAMIDINE ISETHIONATE                          | C0030864 | 9.77E-03 | n/a | 2 | 0.154594512 | 9 |
| FELINE INFECTIOUS PERITONITIS VIRUS VACCINE      | C0310728 | 9.77E-03 | n/a | 2 | 0.154594512 | 9 |
| ORAL POLIOVIRUS VACCINE                          | C0032375 | 9.77E-03 | n/a | 2 | 0.154594512 | 9 |
| BWA868C                                          | C2350218 | 9.77E-03 | n/a | 2 | 0.154594512 | 9 |
| 2 DEOXY 2,3 DEHYDRO N ACETYLNEURAMINIC ACID      | C0046054 | 9.77E-03 | n/a | 2 | 0.154594512 | 9 |
| ACETOPYRROTHINE                                  | C0050460 | 9.77E-03 | n/a | 2 | 0.154594512 | 9 |
| ELASTATINAL                                      | C0059010 | 9.77E-03 | n/a | 2 | 0.154594512 | 9 |
| APRICOXIB                                        | C1737955 | 9.77E-03 | n/a | 2 | 0.154594512 | 9 |
| MC1575                                           | C3712842 | 9.77E-03 | n/a | 2 | 0.154594512 | 9 |
| CAY 10441                                        | C3179460 | 9.77E-03 | n/a | 2 | 0.154594512 | 9 |
| SOPHORIDINE                                      | C0143094 | 9.77E-03 | n/a | 2 | 0.154594512 | 9 |
| ZOMETA                                           | C0939788 | 9.77E-03 | n/a | 2 | 0.154594512 | 9 |
| ANASTELLIN                                       | C0965520 | 9.77E-03 | n/a | 2 | 0.154594512 | 9 |
| OXIDIZED CELLULOSE                               | C0007649 | 9.77E-03 | n/a | 2 | 0.154594512 | 9 |
| PHLOXINE                                         | C0250317 | 9.77E-03 | n/a | 2 | 0.154594512 | 9 |
| ANTITHROMBIN III                                 | C0003438 | 9.77E-03 | n/a | 2 | 0.154594512 | 9 |
| ALLOFERON                                        | C1721989 | 9.77E-03 | n/a | 2 | 0.154594512 | 9 |
| TUMOR VASCULATURE TARGETED TUMOR NECROSIS FACTOR | C1143119 | 9.77E-03 | n/a | 2 | 0.154594512 | 9 |
| ACANTHOIC ACID                                   | C0390661 | 9.77E-03 | n/a | 2 | 0.154594512 | 9 |

Pharmacological Substances (Genomatix) enriched in H<sup>WT</sup>+2HG

ATRA-related Gene signature

VD-related Gene Signature

| Pharmacological substance                 | macological substan | P-value  | Adjusted p-value | # Genes (observed) | # Genes (expected) | # Genes (total) |
|-------------------------------------------|---------------------|----------|------------------|--------------------|--------------------|-----------------|
| TRETINOIN                                 | C0040845            | 1.18E-11 | n/a              | 32                 | 8.268602265        | 989             |
| RETINOIDS                                 | C0035339            | 1.21E-05 | n/a              | 20                 | 6.822223911        | 816             |
| DEXAMETHASONE                             | C0011777            | 1.35E-04 | n/a              | 13                 | 3.89602493         | 466             |
| INTERFERON TYPE I                         | C0021743            | 4.40E-05 | n/a              | 11                 | 2.524891693        | 302             |
| ENDOPEPTIDASES                            | C0030946            | 7.42E-05 | n/a              | 11                 | 2.675381926        | 320             |
| FUCOIDAN                                  | C0060794            | 1.02E-07 | n/a              | 10                 | 1.061792202        | 127             |
| CYCLOHEXIMIDE                             | C0010572            | 1.24E-03 | n/a              | 10                 | 3.1602949          | 378             |
| UROKINASE                                 | C0042071            | 3.97E-05 | n/a              | 9                  | 1.647031998        | 197             |
| ASPIRIN                                   | C0004057            | 9.34E-05 | n/a              | 9                  | 1.839325074        | 220             |
| RECOMBINANT MACROPHAGE COLONY STIMULAT    | C1524095            | 2.58E-05 | n/a              | 8                  | 1.195561298        | 143             |
| 1,2 DIACYLGLYCEROL                        | C0043791            | 2.34E-03 | n/a              | 8                  | 2.332598617        | 279             |
| DIGLYCERIDES                              | C0012262            | 2.45E-03 | n/a              | 8                  | 2.349319754        | 281             |
| IONOMYCIN                                 | C0022020            | 3.30E-03 | n/a              | 8                  | 2.466367713        | 295             |
| CILOSTAZOL                                | C0055729            | 2.73E-05 | n/a              | 7                  | 0.877859694        | 105             |
| SERINE PROTEINASE INHIBITORS              | C0036733            | 4.46E-04 | n/a              | 7                  | 1.371133237        | 164             |
| LINOLEIC ACID                             | C0023749            | 4.80E-04 | n/a              | 7                  | 1.387854374        | 166             |
| CALCITRIOL                                | C0006674            | 5.54E-04 | n/a              | 7                  | 1.421296648        | 170             |
| INTERLEUKIN 12                            | C0123759            | 5.73E-04 | n/a              | 7                  | 1.429657217        | 171             |
| SB 203580                                 | C0297666            | 8.03E-04 | n/a              | 7                  | 1.513262902        | 181             |
| ATORVASTATIN                              | C0286651            | 2.17E-03 | n/a              | 7                  | 1.797522232        | 215             |
| SERPINS                                   | C0036764            | 3.90E-03 | n/a              | 7                  | 1.998175876        | 239             |
| GANGLIOSIDES                              | C0017082            | 5.66E-03 | n/a              | 7                  | 2.140305541        | 256             |
| U 0126                                    | C0755562            | 6.94E-03 | n/a              | 7                  | 2.223911226        | 266             |
| BORTEZOMIB                                | C1176309            | 7.07E-03 | n/a              | 7                  | 2.232271794        | 267             |
| GLUCANS                                   | C0017696            | 8.14E-05 | n/a              | 6                  | 0.719008893        | 86              |
| WY 14,643                                 | C0525129            | 1.18E-04 | n/a              | 6                  | 0.769172304        | 92              |
| PROLINEDITHIOCARBAMATE                    | C0084183            | 1.18E-04 | n/a              | 6                  | 0.769172304        | 92              |
| TELMISARTAN                               | C0248719            | 1.50E-04 | n/a              | 6                  | 0.802614578        | 96              |
| RECOMBINANT INTERFERON ALPHA INDUCIBLE PR | C1522712            | 1.88E-04 | n/a              | 6                  | 0.836056852        | 100             |
| ARTESUNATE                                | C0052432            | 1.88E-04 | n/a              | 6                  | 0.836056852        | 100             |
| VALSARTAN                                 | C0216784            | 2.33E-04 | n/a              | 6                  | 0.869499126        | 104             |
| PROTEASE INHIBITORS                       | C0033607            | 2.45E-04 | n/a              | 6                  | 0.877859694        | 105             |
| FTY 720                                   | C0388088            | 8.31E-04 | n/a              | 6                  | 1.103595044        | 132             |
| PLASMINOGEN ACTIVATOR                     | C0032144            | 1.17E-03 | n/a              | 6                  | 1.178840161        | 141             |
| INDOMETHACIN                              | C0021246            | 1.90E-03 | n/a              | 6                  | 1.29588812         | 155             |
| HEMIN                                     | C0018988            | 2.03E-03 | n/a              | 6                  | 1.312609257        | 157             |
| CERULETIDE                                | C0006639            | 2.52E-03 | n/a              | 6                  | 1.371133237        | 164             |
| RECOMBINANT ALPHA CHEMOKINE               | C1527035            | 2.84E-03 | n/a              | 6                  | 1.404575511        | 168             |
| CARNITINE                                 | C0007258            | 3.19E-03 | n/a              | 6                  | 1.438017785        | 172             |
| VITAMIN D3                                | C3265062            | 3.29E-03 | n/a              | 6                  | 1.446378354        | 173             |

|                                         |          |          |     |   |             |     |
|-----------------------------------------|----------|----------|-----|---|-------------|-----|
| MAGNESIUM CATION                        | C2346927 | 3.38E-03 | n/a | 6 | 1.454738922 | 174 |
| DEXTRAN SULFATE SODIUM                  | C0079225 | 4.21E-03 | n/a | 6 | 1.52162347  | 182 |
| CHOLECALCIFEROL                         | C0008318 | 4.33E-03 | n/a | 6 | 1.529984039 | 183 |
| PREDNISOLONE                            | C0032950 | 5.88E-03 | n/a | 6 | 1.630310861 | 195 |
| ALLERGEN                                | C3274161 | 6.02E-03 | n/a | 6 | 1.63867143  | 196 |
| DINOPROSTONE                            | C0012472 | 9.31E-03 | n/a | 6 | 1.797522232 | 215 |
| PHOSPHATASE INHIBITOR                   | C0597217 | 9.72E-03 | n/a | 6 | 1.814243369 | 217 |
| AM 580                                  | C0102885 | 3.14E-06 | n/a | 5 | 0.234095919 | 28  |
| WEB 2086                                | C0078460 | 3.77E-06 | n/a | 5 | 0.242456487 | 29  |
| CUPRAMMONIUM CELLULOSE                  | C0056591 | 2.79E-05 | n/a | 5 | 0.359504446 | 43  |
| ELASTASE INHIBITOR                      | C0596481 | 3.89E-05 | n/a | 5 | 0.384586152 | 46  |
| RECOMBINANT GRANULOCYTE COLONY STIMULAT | C0376562 | 5.85E-05 | n/a | 5 | 0.418028426 | 50  |
| DIHYDROETHIDIUM                         | C0644810 | 5.85E-05 | n/a | 5 | 0.418028426 | 50  |
| EFAVIRENZ                               | C0674428 | 1.10E-04 | n/a | 5 | 0.476552406 | 57  |
| 4 BETA AMINOETHYLBENZOLSULFOFLUORIDE    | C0047895 | 1.41E-04 | n/a | 5 | 0.501634111 | 60  |
| CIGLITAZONE                             | C0055721 | 1.92E-04 | n/a | 5 | 0.535076385 | 64  |
| RHEIN                                   | C0073177 | 2.07E-04 | n/a | 5 | 0.543436954 | 65  |
| ILOPROST                                | C0079594 | 2.74E-04 | n/a | 5 | 0.576879228 | 69  |
| CYSTEINYL LEUKOTRIENE                   | C0675175 | 5.14E-04 | n/a | 5 | 0.660484913 | 79  |
| ADALIMUMAB                              | C1122087 | 7.58E-04 | n/a | 5 | 0.719008893 | 86  |
| CYTOCHALASIN B                          | C0010737 | 1.30E-03 | n/a | 5 | 0.810975146 | 97  |
| TANSHINONE II A                         | C0897640 | 1.43E-03 | n/a | 5 | 0.827696283 | 99  |
| BUDESONIDE                              | C0054201 | 2.02E-03 | n/a | 5 | 0.894580831 | 107 |
| MERBROMIN                               | C0025397 | 2.10E-03 | n/a | 5 | 0.9029414   | 108 |
| BETA GLUCANS                            | C1134651 | 2.46E-03 | n/a | 5 | 0.936383674 | 112 |
| PROTAMINES                              | C0033603 | 4.37E-03 | n/a | 5 | 1.07015277  | 128 |
| CHENODEOXYCHOLIC ACID                   | C0008024 | 4.52E-03 | n/a | 5 | 1.078513339 | 129 |
| BAFILOMYCIN A1                          | C0052919 | 4.52E-03 | n/a | 5 | 1.078513339 | 129 |
| TROGLITAZONE                            | C0245514 | 5.82E-03 | n/a | 5 | 1.145397887 | 137 |
| KAEMPFEROLS                             | C1257968 | 7.15E-03 | n/a | 5 | 1.203921867 | 144 |
| SEVOFLURANE                             | C0074414 | 7.15E-03 | n/a | 5 | 1.203921867 | 144 |
| MINOCYCLINE                             | C0026187 | 7.15E-03 | n/a | 5 | 1.203921867 | 144 |
| RITUXIMAB                               | C0393022 | 7.15E-03 | n/a | 5 | 1.203921867 | 144 |
| KETAMINE                                | C0022614 | 8.01E-03 | n/a | 5 | 1.237364141 | 148 |
| CPG ODN                                 | C0914671 | 8.93E-03 | n/a | 5 | 1.270806415 | 152 |
| PROTEIN KINASE INHIBITORS               | C1449702 | 9.67E-03 | n/a | 5 | 1.29588812  | 155 |
| TEPOXALIN                               | C0145162 | 5.88E-06 | n/a | 4 | 0.125408528 | 15  |
| NCX 4016                                | C0950966 | 8.11E-05 | n/a | 4 | 0.234095919 | 28  |
| ABCIXIMAB                               | C0288672 | 2.22E-04 | n/a | 4 | 0.300980467 | 36  |
| ANTI INFLAMMATORY AGENTS                | C0003209 | 4.44E-04 | n/a | 4 | 0.359504446 | 43  |
| CETIRIZINE                              | C0055147 | 5.29E-04 | n/a | 4 | 0.376225583 | 45  |
| RADIOIMMUNOCONJUGATES                   | C0243019 | 6.78E-04 | n/a | 4 | 0.401307289 | 48  |
| PIROXICAM                               | C0031990 | 9.88E-04 | n/a | 4 | 0.443110131 | 53  |
| TRANS RESVERATROL                       | C1101322 | 1.06E-03 | n/a | 4 | 0.4514707   | 54  |

|                                    |          |          |     |   |             |    |
|------------------------------------|----------|----------|-----|---|-------------|----|
| OK 432                             | C0918027 | 1.14E-03 | n/a | 4 | 0.459831269 | 55 |
| THERAPEUTIC CORYNEBACTERIUM PARVUM | C1522468 | 1.30E-03 | n/a | 4 | 0.476552406 | 57 |
| TOFACITINIB                        | C2930696 | 1.30E-03 | n/a | 4 | 0.476552406 | 57 |
| DIPHENYLENEIODIUM CHLORIDE         | C0243281 | 1.39E-03 | n/a | 4 | 0.484912974 | 58 |
| 7 AMINOACTINOMYCIN D               | C0049832 | 1.67E-03 | n/a | 4 | 0.50999468  | 61 |
| AGLYCONE                           | C0304518 | 1.89E-03 | n/a | 4 | 0.526715817 | 63 |
| PYRROLIDINE DITHIOCARBAMATE        | C0163305 | 2.92E-03 | n/a | 4 | 0.593600365 | 71 |
| EPLERENONE                         | C0961485 | 3.08E-03 | n/a | 4 | 0.601960933 | 72 |
| PROBUCOL                           | C0033215 | 3.74E-03 | n/a | 4 | 0.635403207 | 76 |
| OLIGOADENYLATE                     | C0133819 | 4.30E-03 | n/a | 4 | 0.660484913 | 79 |
| LOW MOLECULAR WEIGHT HEPARIN       | C0019139 | 4.30E-03 | n/a | 4 | 0.660484913 | 79 |
| DYNE VETERINARY DRUG               | C0308914 | 4.91E-03 | n/a | 4 | 0.685566619 | 82 |
| GROWTH INHIBITORS                  | C0018282 | 5.12E-03 | n/a | 4 | 0.693927187 | 83 |
| AMLODIPINE                         | C0051696 | 5.34E-03 | n/a | 4 | 0.702287756 | 84 |
| SPIRONOLACTONE                     | C0037982 | 5.81E-03 | n/a | 4 | 0.719008893 | 86 |
| U 44619                            | C0917834 | 6.30E-03 | n/a | 4 | 0.73573003  | 88 |
| LUTEIN                             | C0043328 | 6.81E-03 | n/a | 4 | 0.752451167 | 90 |
| NITRITE ION                        | C3848529 | 7.93E-03 | n/a | 4 | 0.785893441 | 94 |
| DIPHENYLENEIODONIUM                | C0058381 | 8.22E-03 | n/a | 4 | 0.794254009 | 95 |
| FT011                              | C3501043 | 5.62E-06 | n/a | 3 | 0.041802843 | 5  |
| SALIX                              | C1815865 | 3.09E-05 | n/a | 3 | 0.066884548 | 8  |
| Y 24180                            | C0149072 | 6.54E-05 | n/a | 3 | 0.083605685 | 10 |
| MANOALIDE                          | C0065711 | 1.18E-04 | n/a | 3 | 0.100326822 | 12 |
| LY 255283                          | C0083286 | 1.94E-04 | n/a | 3 | 0.117047959 | 14 |
| TRYPSIN                            | C0041236 | 2.40E-04 | n/a | 3 | 0.125408528 | 15 |
| TRIFLUSAL                          | C0077126 | 2.40E-04 | n/a | 3 | 0.125408528 | 15 |
| U 75302                            | C0077643 | 2.94E-04 | n/a | 3 | 0.133769096 | 16 |
| LORNOXICAM                         | C0055477 | 2.94E-04 | n/a | 3 | 0.133769096 | 16 |
| 13 HYDROXYOCTADECADIENOIC ACID     | C0090346 | 3.55E-04 | n/a | 3 | 0.142129665 | 17 |
| FILGRASTIM                         | C0210630 | 4.23E-04 | n/a | 3 | 0.150490233 | 18 |
| OZAGREL                            | C0069392 | 4.23E-04 | n/a | 3 | 0.150490233 | 18 |
| CINNAMATES                         | C0008801 | 4.23E-04 | n/a | 3 | 0.150490233 | 18 |
| CINNAMATE                          | C3496185 | 4.23E-04 | n/a | 3 | 0.150490233 | 18 |
| MENHADEN OIL                       | C0065939 | 5.00E-04 | n/a | 3 | 0.158850802 | 19 |
| TRIPAM CYS SER                     | C0091366 | 6.78E-04 | n/a | 3 | 0.175571939 | 21 |
| NEDOCROMIL SODIUM                  | C0886658 | 7.80E-04 | n/a | 3 | 0.183932507 | 22 |
| RO 31 8425                         | C0140783 | 8.91E-04 | n/a | 3 | 0.192293076 | 23 |
| R 59949                            | C0072922 | 1.01E-03 | n/a | 3 | 0.200653644 | 24 |
| RECOMBINANT GAMMA CHEMOKINE        | C1527136 | 1.14E-03 | n/a | 3 | 0.209014213 | 25 |
| ONO 1301                           | C0538030 | 1.14E-03 | n/a | 3 | 0.209014213 | 25 |
| CHYMOPAPAIN                        | C0008736 | 1.14E-03 | n/a | 3 | 0.209014213 | 25 |
| PYRROLIDINEDITHIOCARBAMATE         | C1313719 | 1.29E-03 | n/a | 3 | 0.217374781 | 26 |
| METALLOPORPHYRINS                  | C0025541 | 1.29E-03 | n/a | 3 | 0.217374781 | 26 |
| CORM 2                             | C1120350 | 1.44E-03 | n/a | 3 | 0.22573535  | 27 |

|                                        |          |          |     |   |             |    |
|----------------------------------------|----------|----------|-----|---|-------------|----|
| ROFECOXIB                              | C0762662 | 1.44E-03 | n/a | 3 | 0.22573535  | 27 |
| COPPER SULFATE                         | C0056301 | 1.60E-03 | n/a | 3 | 0.234095919 | 28 |
| EFLORNITHINE                           | C0002260 | 1.60E-03 | n/a | 3 | 0.234095919 | 28 |
| PROCATEROL                             | C0072032 | 1.60E-03 | n/a | 3 | 0.234095919 | 28 |
| CHEMOKINE RECEPTOR ANTAGONIST          | C1880030 | 1.60E-03 | n/a | 3 | 0.234095919 | 28 |
| IRON DEXTRAN COMPLEX                   | C0022092 | 1.77E-03 | n/a | 3 | 0.242456487 | 29 |
| TIROFIBAN                              | C0247025 | 1.77E-03 | n/a | 3 | 0.242456487 | 29 |
| EPICATECHIN 3 GALLATE                  | C0059422 | 1.96E-03 | n/a | 3 | 0.250817056 | 30 |
| CILENGITIDE                            | C0971473 | 1.96E-03 | n/a | 3 | 0.250817056 | 30 |
| BOLDINE                                | C0053908 | 1.96E-03 | n/a | 3 | 0.250817056 | 30 |
| CC 4047                                | C1176324 | 1.96E-03 | n/a | 3 | 0.250817056 | 30 |
| SARPOGRELATE                           | C0286592 | 2.16E-03 | n/a | 3 | 0.259177624 | 31 |
| CARBON BLACK                           | C0007010 | 2.16E-03 | n/a | 3 | 0.259177624 | 31 |
| SERPIN SUPERFAMILY                     | C0036763 | 2.36E-03 | n/a | 3 | 0.267538193 | 32 |
| HUMAN THROMBIN                         | C2369149 | 2.36E-03 | n/a | 3 | 0.267538193 | 32 |
| RECOMBINANT HUMAN THROMBOPOIETIN       | C0392939 | 2.36E-03 | n/a | 3 | 0.267538193 | 32 |
| IMPERATORIN                            | C0063435 | 2.36E-03 | n/a | 3 | 0.267538193 | 32 |
| RILPIVIRINE                            | C1566826 | 2.36E-03 | n/a | 3 | 0.267538193 | 32 |
| INDO 1                                 | C0063477 | 2.36E-03 | n/a | 3 | 0.267538193 | 32 |
| GLUCURONYL GLUCOSAMINE GLYCAN SULFATE  | C0061450 | 2.36E-03 | n/a | 3 | 0.267538193 | 32 |
| CICLESONIDE                            | C0907850 | 2.58E-03 | n/a | 3 | 0.275898761 | 33 |
| CRANBERRY PREPARATION                  | C0453273 | 2.82E-03 | n/a | 3 | 0.28425933  | 34 |
| EPTIFIBATIDE                           | C0253563 | 2.82E-03 | n/a | 3 | 0.28425933  | 34 |
| CRANBERRY ALLERGENIC EXTRACT           | C2740793 | 2.82E-03 | n/a | 3 | 0.28425933  | 34 |
| ZINC OXIDE                             | C0043491 | 3.06E-03 | n/a | 3 | 0.292619898 | 35 |
| TERFENADINE                            | C0085173 | 3.06E-03 | n/a | 3 | 0.292619898 | 35 |
| LINAGLIPTIN                            | C2746078 | 3.06E-03 | n/a | 3 | 0.292619898 | 35 |
| MK 886                                 | C0128640 | 3.06E-03 | n/a | 3 | 0.292619898 | 35 |
| RECOMBINANT INTERLEUKIN 8              | C1527432 | 3.06E-03 | n/a | 3 | 0.292619898 | 35 |
| ONE ALPHA                              | C0591905 | 3.88E-03 | n/a | 3 | 0.317701604 | 38 |
| BENZYL ALCOHOL                         | C0005100 | 3.88E-03 | n/a | 3 | 0.317701604 | 38 |
| SCOPARONE                              | C0074191 | 4.18E-03 | n/a | 3 | 0.326062172 | 39 |
| KETOTIFEN                              | C0022642 | 4.18E-03 | n/a | 3 | 0.326062172 | 39 |
| ECULIZUMAB                             | C1541483 | 4.18E-03 | n/a | 3 | 0.326062172 | 39 |
| LOXORIBINE                             | C0209660 | 4.49E-03 | n/a | 3 | 0.334422741 | 40 |
| RNA SYNTHESIS INHIBITORS               | C0376567 | 4.49E-03 | n/a | 3 | 0.334422741 | 40 |
| STALLIMYCIN                            | C0244119 | 4.49E-03 | n/a | 3 | 0.334422741 | 40 |
| MEASLES VACCINE                        | C0025010 | 4.49E-03 | n/a | 3 | 0.334422741 | 40 |
| RIMONABANT                             | C1142933 | 6.25E-03 | n/a | 3 | 0.376225583 | 45 |
| ALLERGENIC EXTRACT                     | C0440016 | 7.06E-03 | n/a | 3 | 0.39294672  | 47 |
| EFALIZUMAB                             | C1174995 | 7.06E-03 | n/a | 3 | 0.39294672  | 47 |
| SAPORIN                                | C0244777 | 7.92E-03 | n/a | 3 | 0.409667857 | 49 |
| COMPOUND 48 80                         | C0009574 | 7.92E-03 | n/a | 3 | 0.409667857 | 49 |
| ARACHIDONATE 5 LIPOXYGENASE INHIBITORS | C1289971 | 7.92E-03 | n/a | 3 | 0.409667857 | 49 |

|                                      |          |          |     |   |             |    |
|--------------------------------------|----------|----------|-----|---|-------------|----|
| LATANOPROST                          | C0090306 | 8.38E-03 | n/a | 3 | 0.418028426 | 50 |
| GLIOTOXIN                            | C0017641 | 8.38E-03 | n/a | 3 | 0.418028426 | 50 |
| SODIUM SALICYLATE                    | C0037549 | 8.85E-03 | n/a | 3 | 0.426388994 | 51 |
| NATALIZUMAB                          | C1172734 | 9.34E-03 | n/a | 3 | 0.434749563 | 52 |
| GAMMA TOCOPHEROL                     | C0017054 | 9.84E-03 | n/a | 3 | 0.443110131 | 53 |
| CPENSPM                              | C0247670 | 2.06E-04 | n/a | 2 | 0.025081706 | 3  |
| AM6 36                               | C3177627 | 4.11E-04 | n/a | 2 | 0.033442274 | 4  |
| RS 504393                            | C3657798 | 4.11E-04 | n/a | 2 | 0.033442274 | 4  |
| CHLORELLA 11 PEPTIDE                 | C2973755 | 4.11E-04 | n/a | 2 | 0.033442274 | 4  |
| LEUKADHERIN 1                        | C3851799 | 6.81E-04 | n/a | 2 | 0.041802843 | 5  |
| BIGELOVIN                            | C0390315 | 6.81E-04 | n/a | 2 | 0.041802843 | 5  |
| KURARIDIN                            | C2974938 | 6.81E-04 | n/a | 2 | 0.041802843 | 5  |
| HYPERACUTE PANCREATIC CANCER VACCINE | C1831791 | 6.81E-04 | n/a | 2 | 0.041802843 | 5  |
| IDESCARPIN                           | C3713485 | 6.81E-04 | n/a | 2 | 0.041802843 | 5  |
| CCR5 RECEPTOR ANTAGONISTS            | C3850102 | 1.02E-03 | n/a | 2 | 0.050163411 | 6  |
| SC 58635                             | C0538926 | 1.02E-03 | n/a | 2 | 0.050163411 | 6  |
| OC000459                             | C3491265 | 1.02E-03 | n/a | 2 | 0.050163411 | 6  |
| 2 OXOTHIAZOLIDINE 4 CARBOXYLATE      | C0124869 | 1.02E-03 | n/a | 2 | 0.050163411 | 6  |
| PINE BARK EXTRACT                    | C0872909 | 1.02E-03 | n/a | 2 | 0.050163411 | 6  |
| ACETYLAMINOPHENYLARSINE OXIDE        | C0642476 | 1.02E-03 | n/a | 2 | 0.050163411 | 6  |
| WX UK1                               | C1453900 | 1.02E-03 | n/a | 2 | 0.050163411 | 6  |
| GR144053F                            | C1258963 | 1.42E-03 | n/a | 2 | 0.05852398  | 7  |
| NOC 7                                | C0759114 | 1.42E-03 | n/a | 2 | 0.05852398  | 7  |
| SKI 306X                             | C1137701 | 1.42E-03 | n/a | 2 | 0.05852398  | 7  |
| INDOXAM                              | C0767967 | 1.42E-03 | n/a | 2 | 0.05852398  | 7  |
| EICOSAPENTAENOATE                    | C1370123 | 1.42E-03 | n/a | 2 | 0.05852398  | 7  |
| REOPRO                               | C0592046 | 1.42E-03 | n/a | 2 | 0.05852398  | 7  |
| PF 956980                            | C2975489 | 1.42E-03 | n/a | 2 | 0.05852398  | 7  |
| SRPIN340                             | C3712368 | 1.42E-03 | n/a | 2 | 0.05852398  | 7  |
| CEPROTIN                             | C1949898 | 1.88E-03 | n/a | 2 | 0.066884548 | 8  |
| DIPHENYLIODONIUM CHLORIDE            | C0955122 | 1.88E-03 | n/a | 2 | 0.066884548 | 8  |
| DENBUFYLLINE                         | C0057384 | 1.88E-03 | n/a | 2 | 0.066884548 | 8  |
| NITROASPIRIN                         | C0531264 | 1.88E-03 | n/a | 2 | 0.066884548 | 8  |
| 2,2',4,6,6' PENTACHLOROBIPHENYL      | C0962700 | 1.88E-03 | n/a | 2 | 0.066884548 | 8  |
| GSK2606414                           | C3500976 | 1.88E-03 | n/a | 2 | 0.066884548 | 8  |
| DIMEMORFAN                           | C0058193 | 1.88E-03 | n/a | 2 | 0.066884548 | 8  |
| PROXIGERMANIUM                       | C0081913 | 2.40E-03 | n/a | 2 | 0.075245117 | 9  |
| WOBE MUGOS E                         | C0935809 | 2.40E-03 | n/a | 2 | 0.075245117 | 9  |
| LYSO 7                               | C3714050 | 2.40E-03 | n/a | 2 | 0.075245117 | 9  |
| NSC 651016                           | C0676196 | 2.40E-03 | n/a | 2 | 0.075245117 | 9  |
| N ACETYLCYSTEINAMIDE                 | C1452654 | 2.40E-03 | n/a | 2 | 0.075245117 | 9  |
| RAMATROBAN                           | C0753318 | 2.98E-03 | n/a | 2 | 0.083605685 | 10 |
| WOBENZYM                             | C0078510 | 2.98E-03 | n/a | 2 | 0.083605685 | 10 |
| ONO 5046                             | C0133951 | 2.98E-03 | n/a | 2 | 0.083605685 | 10 |

|                                          |          |          |     |   |             |    |
|------------------------------------------|----------|----------|-----|---|-------------|----|
| ANTISTASIN                               | C0052098 | 3.63E-03 | n/a | 2 | 0.091966254 | 11 |
| ABIETIC ACID                             | C0050365 | 3.63E-03 | n/a | 2 | 0.091966254 | 11 |
| GAMBOGE                                  | C0301271 | 3.63E-03 | n/a | 2 | 0.091966254 | 11 |
| YCG 063                                  | C2974353 | 3.63E-03 | n/a | 2 | 0.091966254 | 11 |
| PYRILAMINE MALEATE                       | C0282330 | 3.63E-03 | n/a | 2 | 0.091966254 | 11 |
| BAY X 1005                               | C0656891 | 3.63E-03 | n/a | 2 | 0.091966254 | 11 |
| VIOXX                                    | C0876768 | 3.63E-03 | n/a | 2 | 0.091966254 | 11 |
| PCB 104                                  | C1453501 | 3.63E-03 | n/a | 2 | 0.091966254 | 11 |
| PHENYLAMIL                               | C0070664 | 4.33E-03 | n/a | 2 | 0.100326822 | 12 |
| PHENYL BUTYRATE                          | C3848590 | 4.33E-03 | n/a | 2 | 0.100326822 | 12 |
| CATUMAXOMAB                              | C1831854 | 4.33E-03 | n/a | 2 | 0.100326822 | 12 |
| ETHYL PROTOCATECHUATE                    | C0059781 | 4.33E-03 | n/a | 2 | 0.100326822 | 12 |
| 3 MORPHOLINO SYDNONIMINE MONOHYDROCHI    | C0951117 | 4.33E-03 | n/a | 2 | 0.100326822 | 12 |
| ISIS 2302                                | C3495448 | 5.09E-03 | n/a | 2 | 0.108687391 | 13 |
| EOSINOPHIL DERIVED NEUROTOXIN            | C0059409 | 5.09E-03 | n/a | 2 | 0.108687391 | 13 |
| PHOSPHORUS 32                            | C0851287 | 5.09E-03 | n/a | 2 | 0.108687391 | 13 |
| 2,5 DI TERT BUTYLHYDROQUINONE            | C0045546 | 5.09E-03 | n/a | 2 | 0.108687391 | 13 |
| POLY L LACTIC ACID                       | C0525166 | 5.09E-03 | n/a | 2 | 0.108687391 | 13 |
| CYL 26Z                                  | C1613957 | 5.09E-03 | n/a | 2 | 0.108687391 | 13 |
| CP 105696                                | C0289246 | 5.09E-03 | n/a | 2 | 0.108687391 | 13 |
| HEME ARGINATE                            | C0062212 | 5.90E-03 | n/a | 2 | 0.117047959 | 14 |
| TAMIBAROTENE                             | C1567753 | 5.90E-03 | n/a | 2 | 0.117047959 | 14 |
| PICLAMILAST                              | C0295451 | 5.90E-03 | n/a | 2 | 0.117047959 | 14 |
| RWJ 67657                                | C0910100 | 5.90E-03 | n/a | 2 | 0.117047959 | 14 |
| CV 3988                                  | C0056625 | 5.90E-03 | n/a | 2 | 0.117047959 | 14 |
| RP 73401                                 | C0295452 | 6.77E-03 | n/a | 2 | 0.125408528 | 15 |
| SMALLPOX VACCINE                         | C0037355 | 6.77E-03 | n/a | 2 | 0.125408528 | 15 |
| APO 866                                  | C1879518 | 6.77E-03 | n/a | 2 | 0.125408528 | 15 |
| LOVAZA                                   | C0912903 | 6.77E-03 | n/a | 2 | 0.125408528 | 15 |
| LG 268                                   | C0965513 | 6.77E-03 | n/a | 2 | 0.125408528 | 15 |
| RO 41 5253                               | C0250032 | 6.77E-03 | n/a | 2 | 0.125408528 | 15 |
| COD LIVER OIL                            | C0009213 | 7.70E-03 | n/a | 2 | 0.133769096 | 16 |
| RECOMBINANT GRANULOCYTE MACROPHAGE COI   | C0376563 | 7.70E-03 | n/a | 2 | 0.133769096 | 16 |
| FRUCTOOLIGOSACCHARIDE                    | C0873033 | 7.70E-03 | n/a | 2 | 0.133769096 | 16 |
| WEB 2170                                 | C0085001 | 7.70E-03 | n/a | 2 | 0.133769096 | 16 |
| ADENOSINE DIPHOSPHATE RECEPTOR ANTAGONIS | C2936586 | 7.70E-03 | n/a | 2 | 0.133769096 | 16 |
| ISOANGUSTONE A                           | C2936061 | 7.70E-03 | n/a | 2 | 0.133769096 | 16 |
| JTE 522                                  | C0670957 | 7.70E-03 | n/a | 2 | 0.133769096 | 16 |
| POLYAMINE ANALOGUE                       | C1709590 | 8.68E-03 | n/a | 2 | 0.142129665 | 17 |
| INT 747                                  | C2830015 | 8.68E-03 | n/a | 2 | 0.142129665 | 17 |
| SPIRAMYCIN                               | C0037962 | 8.68E-03 | n/a | 2 | 0.142129665 | 17 |
| MAPRACORAT                               | C3252363 | 8.68E-03 | n/a | 2 | 0.142129665 | 17 |
| 4 BROMOPHENACYL BROMIDE                  | C0048134 | 9.71E-03 | n/a | 2 | 0.150490233 | 18 |
| POLY ICLC                                | C0071359 | 9.71E-03 | n/a | 2 | 0.150490233 | 18 |



|                            |          |          |     |   |             |    |
|----------------------------|----------|----------|-----|---|-------------|----|
| DIRECT THROMBIN INHIBITORS | C3541936 | 9.71E-03 | n/a | 2 | 0.150490233 | 18 |
| CB 3717                    | C0054911 | 9.71E-03 | n/a | 2 | 0.150490233 | 18 |
| BACTENECIN                 | C0052891 | 9.71E-03 | n/a | 2 | 0.150490233 | 18 |
| CORN TRYPSIN INHIBITOR     | C0077421 | 9.71E-03 | n/a | 2 | 0.150490233 | 18 |
| GAMMA THROMBIN             | C0017052 | 9.71E-03 | n/a | 2 | 0.150490233 | 18 |

---
