# Supplementary material for: Activation of Vitamin D Receptor Pathway Enhances Differentiating Capacity in Acute Myeloid Leukemia with Isocitrate Dehydrogenase Mutations
Source: MDPI journal article supplement (doi:10.3390/cancers13205243), 2021-10-19
Supplement: s1 [file s1]

**Table S5.** Clinical characteristics of AML patients (related to Figure 4).

| Ps          | 1       | 2            | 3            | 4       | 5            | 6         | 7         | 8            | 9       | 10           | 11        | 12        |
|-------------|---------|--------------|--------------|---------|--------------|-----------|-----------|--------------|---------|--------------|-----------|-----------|
| ELN 2017    | Adverse | Intermediate | Intermediate | Adverse | Intermediate | Favorable | Favorable | Intermediate | Adverse | Intermediate | Favorable | Favorable |
| F/M         | F       | M            | M            | M       | M            | F         | M         | M            | M       | M            | M         | F         |
| Bone marrow | yes     | yes          | yes          | yes     | yes          |           | yes       |              | yes     | yes          |           | yes       |
| Blood       | no      | no           | no           | no      | no           | yes       | yes       |              | no      | yes          | yes       |           |
| FAB         | 1       | 4            | 1            | 2       | 2            | 4         | 4         | 2            | 2       | 1            | 2         | 2         |

  

|                     |           |           |            |           |            |           |               |                                             |            |           |                                                                                 |             |
|---------------------|-----------|-----------|------------|-----------|------------|-----------|---------------|---------------------------------------------|------------|-----------|---------------------------------------------------------------------------------|-------------|
| Caryotype           | 46,XX<20> | 46,XY<22> | 46,XY [20] |           | 46,XY [20] | 46,XY<20> | 46,XY<20>     |                                             | 46,XY [20] | 46,XY<20> | 46,XY,inv(16)(p13q22)<4>/46,s,del(3)(p23p13),t(12;22)(p13;q12)<8>/45,s,del(7<4> |             |
|                     |           |           |            | 46,XY<20> |            |           |               | 47,XY,+1,der(1;7)(q10;p10),+21<11>/46,XY<1> |            |           |                                                                                 |             |
| IDH1                | R132H     | R132H     | no         | no        | no         | no        | R132H         | R132G                                       | no         | no        | no                                                                              | no          |
| IDH2                | no        | no        | R140Q      | R140Q     | R140Q      | R140Q     | R140Q         | no                                          | R140Q      | R140Q     | yes                                                                             | R140Q       |
| NPM1                | no        | no        | yes        | no        | no         | yes       | yes           | no                                          | no         | no        | no                                                                              | yes         |
| FLT3                | yes ITD   | yes ITD   | yes (ITD)  | no        | no         | TKD D835Y | es (TKD D835H | no                                          | no         | ITD       | no                                                                              | no (TKD nd) |
| CEBPA               | no        | no        | no         | no        | no         | no        | no            | no                                          | no         | nd        | no                                                                              | nd          |
| DNMT3A              | no        | no        | no         | no        | no         | yes       | nd            | no                                          | no         | nd        | no                                                                              | nd          |
| NRAS/KRAS           | nd        | nd        | no         | nd        | no         | nd        | Nras          | nd                                          | no         | nd        | no                                                                              | nd          |
| Diag/relapse/refrac | diag      | diag      | diag       | relapse   | diag       | relapse   | diag          | relapse                                     | diag       | diag      | rechute                                                                         | diag        |

  

| Ps          | 13        | 14        | 15      | 16           | 17        | 18      | 19        | 20      | 21      | 22        | 23           | 24        |
|-------------|-----------|-----------|---------|--------------|-----------|---------|-----------|---------|---------|-----------|--------------|-----------|
| ELN 2017    | Favorable | Favorable | Adverse | Intermediate | Favorable | Adverse | Favorable | Adverse | Adverse | Favorable | Intermediate | Favorable |
| F/M         | M         | F         | M       | M            | F         | M       | M         |         | M       | M         | M            | F         |
| Bone marrow | yes       | yes       | yes     | yes          | no        | no      | no        | no      | no      | no        | no           | no        |
| Blood       | no        | no        | yes     | no           | yes       | yes     | yes       | yes     | yes     | yes       | yes          | yes       |
| FAB         | 5         | 1         | 2       | 2            | 2         | ?       | 1         | 4       | 2       | 4         | 2            | 2         |

  

|                     |           |             |         |               |                                                                                                                                  |           |                            |               |           |                                                   |           |           |
|---------------------|-----------|-------------|---------|---------------|----------------------------------------------------------------------------------------------------------------------------------|-----------|----------------------------|---------------|-----------|---------------------------------------------------|-----------|-----------|
| Caryotype           | 46,XY<20> | 46,XX<20>   |         | 47,XY,+11<20> |                                                                                                                                  | 46,XY<21> | 46,XY,t(8;21)(q22;q22)<20> | 47,XX,+8 [20] | 46,XY<20> | 46,XY,del(7)(q32q36),inv(16)(p13q22)<18>/46,XY<3> | 46,XY<20> | 46,XX<20> |
|                     |           |             | Complex |               | 46,XX,der(8)t(8;21)(q21;q22),der(14;t(10;q10)c t(8;21),+21<7>/46,s,der(16)t(13;16)(q14;q24)<12>/46,XX,rob(14;21)(q10;q10),+21<2> |           |                            |               |           |                                                   |           |           |
| IDH1                | R132H     | no          | no      | no            | no                                                                                                                               | no        | no                         | no            | no        | no                                                | no        | no        |
| IDH2                | no        | R140L       | R140Q   | R140Q         | R140Q                                                                                                                            | no        | no                         | no            | no        | no                                                | no        | no        |
| NPM1                | yes       | yes         | no      | no            | no                                                                                                                               | no        | no                         | no            | no        | no                                                | no        | yes       |
| FLT3                | no        | TKD (D835Y) | nd      | no            | no                                                                                                                               | ITD       | ITD                        | no            | no        | no                                                | yes ITD   | no        |
| CEBPA               | no        | nd          | nd      | nd            | no                                                                                                                               | no        | no                         | no            | no        | no                                                | no        | yes       |
| DNMT3A              | no        | no          | nd      | nd            | no                                                                                                                               | no        | no                         | no            | no        | no                                                | no        | yes       |
| NRAS/KRAS           | nd        | no          | nd      | nd            | nd                                                                                                                               | ND        | ND                         | no            | no        | yes                                               | ND        | ND        |
| Diag/relapse/refrac | diag      | diag        | Relapse | diag          | relapse                                                                                                                          | relapse   | diag                       | diag          | diag      | diag                                              | diag      | diag      |

  

| Ps                  | 25           | 26           | 27           |
|---------------------|--------------|--------------|--------------|
| ELN 2017            | Intermediate | Intermediate | Intermediate |
| F/M                 | 26/04/1946   | M            | M            |
| Bone marrow         | no           | no           | no           |
| Blood               | yes          | yes          | yes          |
| FAB                 | 2            | 5            | 2            |
| Caryotype           | 46,XY<20>    | 46,XY<20>    | 46,XY<20>    |
| IDH1                | no           | no           | no           |
| IDH2                | no           | no           | no           |
| NPM1                | yes          | yes          | no           |
| FLT3                | yes ITD      | ITD          | no           |
| CEBPA               | no           | no           | no           |
| DNMT3A              | no           | yes          | no           |
| NRAS/KRAS           | nd           | nd           | yes          |
| Diag/relapse/refrac | diag         | diag         | diag         |
