# Supplementary material for: Activation of Vitamin D Receptor Pathway Enhances Differentiating Capacity in Acute Myeloid Leukemia with Isocitrate Dehydrogenase Mutations
Source: MDPI journal article supplement (doi:10.3390/cancers13205243), 2021-10-19
Supplement: s1 [file s1]

**Table S1 : Gene signature (related to Figure 1A)**

| HL60 <sup>MUT</sup> (Boutzen et al., 2016)                                                                               |                                                                                                                          | HL60 <sup>WT</sup> +2HG (Boutzen et al., 2016)                              | IDH <sup>MUT</sup> patient (TCGA)                                                                          |                                                                                               | IDH <sup>MUT</sup> patient (Verhaak)                                                                       |                     |
|--------------------------------------------------------------------------------------------------------------------------|--------------------------------------------------------------------------------------------------------------------------|-----------------------------------------------------------------------------|------------------------------------------------------------------------------------------------------------|-----------------------------------------------------------------------------------------------|------------------------------------------------------------------------------------------------------------|---------------------|
| <i>Upregulated and Downregulated (&gt;+/-1.5-fold change) genes in HL60 IDH1-R132H to WT IDH1 (Boutzen et al., 2016)</i> | <i>Downregulated (&gt;+/-0.667-fold change et pv&lt;0.05) genes in HL60 IDH1-R132H to WT IDH1 (Boutzen et al., 2016)</i> | <i>ATRA responsive genes in WT+2HG (FDR&lt;0.05) (Boutzen et al., 2016)</i> | <i>Upregulated and Downregulated (&gt;+/- 1.5-fold change et pv&lt;0.05) genes in mutant IDH to WT IDH</i> | <i>Downregulated (&gt;+/- 0.667-fold change et pv&lt;0.05) genes in mutant IDH1 to WT IDH</i> | <i>Upregulated and Downregulated (&gt;+/- 1.5-fold change et pv&lt;0.05) genes in mutant IDH to WT IDH</i> |                     |
| CCNA1                                                                                                                    | CLECL1                                                                                                                   | XK                                                                          | CYP27C1                                                                                                    | CARNS1                                                                                        | CD36                                                                                                       | ELL2                |
| NFATC2                                                                                                                   | ZNF429                                                                                                                   | VIM-AS1                                                                     | STL                                                                                                        | GPR183                                                                                        | CX3CR1                                                                                                     | SELL                |
| MNDA                                                                                                                     | ZNF431                                                                                                                   | TYROBP                                                                      | ATP1A3                                                                                                     | RBM47                                                                                         | SCPEP1                                                                                                     | DNM1                |
| PRTN3                                                                                                                    | IGUJ3                                                                                                                    | TTLL11-IT1                                                                  | CYMP                                                                                                       | TDO2                                                                                          | CRYGB                                                                                                      | CDK3                |
| CPT1A                                                                                                                    | GPR174                                                                                                                   | TRIB1                                                                       | ZFP112                                                                                                     | CTXN1                                                                                         | KIR2DL4                                                                                                    | GAB2                |
| SLCO4C1                                                                                                                  | ZNF551                                                                                                                   | TNRC6C-AS1                                                                  | NMT2                                                                                                       | NPBWR2                                                                                        | ARSG                                                                                                       | AMY1A /// AMY1B /// |
| IL8                                                                                                                      | ZNF680                                                                                                                   | TNFAIP2                                                                     | NCRNA00246B                                                                                                | SPAG6                                                                                         | PECAM1                                                                                                     | SSBP2               |
| DSG2                                                                                                                     | ZNF714                                                                                                                   | TLR3                                                                        | DOC2A                                                                                                      | HCRTR2                                                                                        | CPE                                                                                                        | MEIS1               |
| SCPEP1                                                                                                                   | GALNT3                                                                                                                   | THSD7A                                                                      | PGAP1                                                                                                      | LOC100129935                                                                                  | PNPLA1                                                                                                     | TRIM73              |
| LYZ                                                                                                                      | IGLL1                                                                                                                    | THEMIS2                                                                     | OBSL1                                                                                                      | PHKG1                                                                                         | GHRHR                                                                                                      | PBX3                |
| GLIPR1                                                                                                                   | T1560                                                                                                                    | TCN1                                                                        | ABCA3                                                                                                      | GAS2L3                                                                                        | CXorf21                                                                                                    | STAR                |
| ANPEP                                                                                                                    | ZNF350                                                                                                                   | SUCNR1                                                                      | OR2L13                                                                                                     | OTC                                                                                           | DOCK9                                                                                                      | MARCKSL1            |
| CCR7                                                                                                                     | CRIM1                                                                                                                    | SREBF1                                                                      | FLRT3                                                                                                      | M41                                                                                           | SIGLEC9                                                                                                    | FOSL2               |
| CD68                                                                                                                     | SH2D4A                                                                                                                   | SQRDL                                                                       | CCDC102A                                                                                                   | IFI30                                                                                         | C3orf47                                                                                                    | RGC32               |
| ACSS2                                                                                                                    | FSTL5                                                                                                                    | SPRY1                                                                       | F3                                                                                                         | LOC100128098                                                                                  | KCNK6                                                                                                      | C1ORF186            |
| PTGR1                                                                                                                    | ZNF83                                                                                                                    | SPECC1                                                                      | COL4A5                                                                                                     | CDKN1A                                                                                        | CXCL16                                                                                                     | LOC286052           |
| TNF                                                                                                                      | CLC                                                                                                                      | SMOX                                                                        | C14orf79                                                                                                   | NPPA                                                                                          | SLC28A2                                                                                                    | ARL4A               |
| CEBPA                                                                                                                    | ZNF675                                                                                                                   | SMIM3                                                                       | LOC400891                                                                                                  | LOC400084                                                                                     | AMICA1                                                                                                     | PRICKLE1            |
| TRIM71                                                                                                                   | GPR65                                                                                                                    | SLC44A1                                                                     | PTGR2                                                                                                      | KCTD21                                                                                        | C16orf3                                                                                                    | USP44               |
| DHRS9                                                                                                                    | ZNF544                                                                                                                   | SLC16A9                                                                     | INHBE                                                                                                      | PLBD1                                                                                         | CCDC144C                                                                                                   | HOXA4               |
| TNFAIP3                                                                                                                  | ZNF530                                                                                                                   | SLA                                                                         | INSL3                                                                                                      | FSTL5                                                                                         | SP8                                                                                                        | SLC35F2             |
| PTPRJ                                                                                                                    | ZNF790                                                                                                                   | SIGLEC5                                                                     | PRKD3                                                                                                      | GAFA1                                                                                         | ITGAM                                                                                                      | DACH1               |
| P2RX7                                                                                                                    | ZNF850                                                                                                                   | SERPINB8                                                                    | MAK                                                                                                        | PTPRK                                                                                         | PDE7B                                                                                                      | BTBD11              |
| JUP                                                                                                                      | SH3BGR12                                                                                                                 | SERPINB2                                                                    | H2BFM                                                                                                      | FAM9C                                                                                         | SH2B3                                                                                                      | SNCAIP              |
| CTSG                                                                                                                     | ZNF814                                                                                                                   | SERPINB10                                                                   | ST7OT1                                                                                                     | CD86                                                                                          | SLC7A7                                                                                                     | ADAM17              |
| MS4A3                                                                                                                    | ZNF260                                                                                                                   | SERPINB1                                                                    | DOCK4                                                                                                      | WDR16                                                                                         | HLA-DMA                                                                                                    | PELI2               |
| LTBR                                                                                                                     | CST7                                                                                                                     | SELP                                                                        | COL24A1                                                                                                    | LOC100130468                                                                                  | GPM6B                                                                                                      | HOXB2               |
| RET                                                                                                                      | MIR181B2                                                                                                                 | SELL                                                                        | ZBTB16                                                                                                     | FBXL2                                                                                         | PTPRJ                                                                                                      | MIRN21              |
| FCGR1A                                                                                                                   | IL1RL1                                                                                                                   | SCUBE1                                                                      | CPA3                                                                                                       | CEACAM6                                                                                       | SCG5                                                                                                       | NXF3                |
| CD300A                                                                                                                   | TCF4                                                                                                                     | SCPEP1                                                                      | SLC16A9                                                                                                    | SOX14                                                                                         | APCDD1L                                                                                                    | GPC4                |
| AZU1                                                                                                                     | YME1L1                                                                                                                   | SAT1                                                                        | MYCN                                                                                                       | RBP1                                                                                          | QRFPR                                                                                                      | DPYSL3              |
| LGALS1                                                                                                                   | ZNF550                                                                                                                   | RXRA                                                                        | HOXA9                                                                                                      | SLC30A2                                                                                       | LOC401324                                                                                                  | HOXA10              |
| KLF6                                                                                                                     | ANXA3                                                                                                                    | ROGDI                                                                       | GOLGA8B                                                                                                    | LOC100505832                                                                                  | HIST1H2BK                                                                                                  | TMEM49              |
| GBP2                                                                                                                     | SMIM10                                                                                                                   | ROCK1P1                                                                     | HTRA3                                                                                                      | UTS2                                                                                          | CAPN12                                                                                                     | FAM46A              |

|            |           |              |           |              |              |                      |
|------------|-----------|--------------|-----------|--------------|--------------|----------------------|
| APOBEC3G   | RAB27B    | RNU5B-1      | SCGB2A2   | ELTD1        | LOC440900    | NFIL3                |
| APOBEC3D   | NFE2L3    | RCSD1        | WDFY3     | RASGEF1A     | CLECL1       | SLC9A3               |
| NRP1       | HEG1      | RALGAPA2     | CDH2      | DSCAML1      | WFDC1        | TES                  |
| JUN        | CEP70     | RAB31        | LOC644538 | MCOLN2       | LOC100505633 | IRX5                 |
| ME1        | MIR3198-1 | PVRL1        | ANKRD33B  | LOC388210    | CARD18       | FUT4                 |
| TSHZ3      | CD38      | PTGS1        | LRP12     | SEPX1        | RNF148       | PGAP1                |
| METTL7A    | TRAJ36    | PSMB10       | FLJ41455  | SP5          | HSPC159      | ATP2B1               |
| PREX1      | HPSE      | PRTN3        | SH3BGRL2  | UPP1         | MST1P9       | RASAL2               |
| AHNAK      | AAK1      | PRKCB        | LHFP      | LOC642345    | CD33         | FGFRL1               |
| STEAP3     | EXOC6B    | PRG2         | SLC9A7    | GLRX         | CD74         | CFD                  |
| MIR33B     | CBX5      | PRAM1        | PABPC4L   | ODZ4         | LOC730755    | AK5                  |
| ZNF385A    | FAM134B   | PPP1R18      | KIT       | CD1B         | SERPINI2     | CHD7                 |
| STAR       | ZNF430    | PLEK         | LRRC56    | MAS1L        | DENND2D      | AZU1                 |
| TYROBP     | XYLT1     | PLCB2        | MLLT11    | ANXA13       | PART1        | LOC285148            |
| SERPINB1   | ZNF708    | PIWIL4       | MFI2      | LOC100128946 | GIMAP8       | HNRPLL               |
| SESN3      | TRAJ38    | PARP14       | TWISTNB   | BCL2A1       | MGC42157     | SKIL                 |
| ITGA6      | TFPI      | OSM          | CBX2      | SLITRK1      | PLEKHA7      | JAG1                 |
| PLXNB2     | ZNF345    | OAS3         | CRISPLD1  | ALS2CR12     | CES1         | HOXB6                |
| CFD        | GPR27     | NOG          | GRAMD1C   | SLC25A18     | MYBPH        | LOC652226            |
| TNFAIP2    | ANXA1     | NFE2         | RASAL2    | RBM20        | MYCBPAP      | COL4A5               |
| TEX15      | ANTXR1    | NDRG1        | KISS1R    | ABRA         | EFHD1        | HOXA3                |
| CD300C     | ZNF721    | NCF2         | KHDRBS3   | ITIH3        | SIGLEC5      | NRXN2                |
| TNFRSF10D  | EML5      | NCF1C        | CLDN10    | RNASE3       | KAZALD1      | RFX2                 |
| TSPAN14    | DACH1     | NCF1B        | CCDC122   | ARSJ         | TEKT3        | HOXA5                |
| MS4A7      | SLC22A16  | MOV10        | SERPINH1  | WDR87        | TNFRSF11A    | DSC2                 |
| STXBPSL    | ZDHHC23   | MIR548D1     | TRAT1     | LOC100506495 | REXO1L1      | HOXB3                |
| LPPR3      | IGUJ7     | MIR181B1     | PON2      | THBD         | AGXT         | MXD1                 |
| YME1L1     | TRBV5-4   | MICAL2       | TFPI      | TKTL1        | SLC26A3      | LOC643911 /// LOC650 |
| CLEC12A    | ZNF566    | METTL7A      | NRXN2     | DKFZP434F142 | CD300LF      | CTSG                 |
| VIM        | UBXN10    | MCEMP1       | CHST13    | PLA2G10      | ARHGAP39     | NKX2-3               |
| MIR223     | PDE7B     | LOC100506459 | RAB9B     | SPIB         | PRG3         | S100A10              |
| PCED1B-AS1 | EPX       | LINC00649    | C19orf77  | DNTT         | SLC44A3      | CD9                  |
| PTGS1      | CCDC141   | LFNG         | C1orf186  | VNN1         | HDAC9        | HOXA9                |
| PRSS57     | MIR361    | LBR          | RBP4      | GNPDA1       | OSTalpha     | MPO                  |
| EMILIN2    | TRBV6-6   | KRTAP9-3     | ZNF324    | ABCC6        | CNTN4        | CCNA1                |
| CMTM7      | TRAJ45    | KDM7A        | LOC154761 | BEAN1        | GCNT2        | HOMER3               |
| HGF        | CYP4V2    | ITGB7        | HDGFRP3   | ALDH4A1      | TPK1         | MGC33556             |
| CCL3L3     | LUM       | ITGAX        | OSM       | LOC253044    | LOC285778    | NEGR1                |
| KLF7       | MIR4521   | ITGAM        | ENO2      | TULP1        | GPRIN3       | MYCN                 |
| LILRA2     | KRCC1     | ITGA5        | EGR1      | KIAA0825     | C20orf186    | TPSAB1 /// TPSB2 /// |
| ARMCX6     | IFITM1    | IRF1         | NPM2      | LILRB3       | XCR1         | TPSAB1               |
| CR1        | TRAJ34    | IL6R         | FAM57A    | LOC283033    | CD1A         | EREG                 |
| DDIT4      | SESTD1    | IL10RB-AS1   | DPY19L2   | IL1F8        | C1orf116     | RASGRP3              |
| ALDOC      | NLR3      | IER3         | NUDT9P1   | UCP2         | CCDC153      | MAMDC2               |

|         |           |            |              |              |              |       |
|---------|-----------|------------|--------------|--------------|--------------|-------|
| IL6ST   | IL5RA     | ICAM1      | EMID1        | RPS6KL1      | PLIN4        | CA2   |
| APBB1IP | IFITM2    | HOXA1      | DPYSL3       | C1orf49      | OR4C1P       | IRX3  |
| METTL7B | KRT6C     | HNRNP1L    | LOC401097    | ARHGAP31     | FBXO6        | CCDC3 |
| ARNTL   | CLDN12    | HLA-L      | CD59         | CTTNBP2      | ARHGEF10L    | BEX1  |
| FKBP3   | CGREF1    | HIC1       | HMBBOX1      | C4orf34      | NAGK         |       |
| HVCN1   | ACTR3B    | HGF        | SCML1        | SAMD4A       | EHD3         |       |
| GPR84   | FAM46C    | GZMA       | TANC2        | GIMAP7       | FCER1A       |       |
| BPI     | SASH3     | GVINP1     | SMAD1        | ADCY8        | LIPJ         |       |
| CXCL10  | LNP1      | GRN        | CENPV        | EPAS1        | BANK1        |       |
| FOSL2   | TMEM14A   | GPR174     | SEPP1        | CLRN3        | RAB31        |       |
| LYST    | CSTF2T    | GPR132     | ZNF711       | CDH5         | TBX15        |       |
| IL6R    | MYH15     | GNG2       | LRRN1        | KCNJ11       | DLL4         |       |
| THEMIS2 | ZNF573    | GBP3       | CCDC3        | C6orf138     | PLAC4        |       |
| DDIT3   | HES1      | GBP2       | DNM1         | DKK2         | ANXA2        |       |
| MTL5    | SAMD9L    | GALM       | HMGNS        | NLRC4        | LOC728342    |       |
| NFE2    | UBE2E3    | FLOT1      | ARHGAP5      | LHX6         | C21orf56     |       |
| ARRB1   | PLCH1     | FGR        | ATP6AP1L     | SLC38A4      | TLCD1        |       |
| SGPP1   | ZNF613    | FGFBP3     | MAP1A        | SNX31        | RIT2         |       |
| TET1    | TIGD2     | FBP1       | CDK14        | HIST1H4D     | SERPINB8     |       |
| IFI30   | IGFBP2    | FAM46C     | USP53        | ALOX5        | HLA-DQA1     |       |
| PSTPIP2 | TRAJ56    | F5         | IGF1R        | TNF          | SLC18A3      |       |
| ELANE   | FAM171B   | ERAP2      | FLJ41484     | XK           | ATP4A        |       |
| HSPA1B  | FAHD2B    | EPX        | C1orf21      | FAM9B        | LOC284669    |       |
| EMR2    | NCALD     | EPAS1      | PP13439      | IFNK         | CIB2         |       |
| C5AR1   | ZNF8      | EMILIN2    | SERPINE1     | LOC100505964 | LY9          |       |
| SSBP3   | ZDHHC14   | ELF4       | CYP11A1      | HOXB1        | KLK15        |       |
| VCL     | PCSK6     | EDIL3      | C5orf30      | NAT8         | CD1D         |       |
| PXN     | CABLES1   | DTX3L      | LOC100127983 | TIMP1        | FGGY         |       |
| JHDM1D  | RIMKLB    | DOCK5      | ANKRD37      | CA3          | AGTRAP       |       |
| PTGER4  | MIR563    | DNAJB12    | LOC283861    | KLRF1        | LOC729059    |       |
| LDLRAD3 | MIR29C    | DHRS9      | TRIM6        | PHYHD1       | LOC100506655 |       |
| RAB39A  | septin 11 | DHRS3      | LOC100101266 | LOC285972    | IL1F10       |       |
| ANKRD22 | CYB5A     | DEFB115    | GPHN         | CD68         | CALML4       |       |
| SLAMF6  | THSD7A    | DDX60      | FAM135A      | LONRF2       | HORMAD1      |       |
| ARMCX3  | TFR2      | DDIT4      | LOC100506451 | HTR3B        | C1orf65      |       |
| PVR     | PROK2     | CYTH4      | AASS         | LOC497256    | ZNF718       |       |
| S100A13 | KBTBD7    | CYBB       | TMEM99       | ASB2         | OPLAH        |       |
| FHL3    | SLC9A7    | CTSO       | ZNF880       | VLDLR        | LOC285419    |       |
| KITLG   | ZNF264    | CLEC12A    | FAM89A       | FGD4         | OGFRL1       |       |
| LMNA    | YME1L1    | CFP        | TLR3         | CLEC1B       | KCTD12       |       |
| TRAM1   | DBP       | CELSR3-AS1 | GPSM1        | CD19         | GRASPOS      |       |
| RXRA    | TESPA1    | CEBPA      | ZNF257       | C17orf44     | GRIP2        |       |
| CD86    | EXPH5     | CD53       | MAP7         | SYTL5        | ZIC3         |       |
| OAS3    | WDR17     | CD38       | PHGDH        | NCAN         | C2orf55      |       |

|            |          |              |              |              |
|------------|----------|--------------|--------------|--------------|
| ILDR2      | CD300LB  | ZBTB10       | LOC439938    | VIPR2        |
| RNFT1      | CD300A   | ZNF251       | LRG1         | MPZL3        |
| ENTPD1     | CCR1     | LOC400986    | FIBCD1       | NPFFR2       |
| HLA-C      | CCNA1    | CLGN         | MGC87042     | IFIT5        |
| DNM1       | CCL20    | LOC100506010 | SERPINB2     | CD80         |
| TMBIM1     | CCL2     | DSC2         | KCTD7        | TNFSF13B     |
| EVI2B      | CARD6    | ZNF578       | ZRSR1        | LOC339260    |
| SLC25A6    | C1orf106 | AUTS2        | GIMAP4       | MGMT         |
| STXBP6     | C16orf54 | ATP1B1       | C10orf44     | NEDD9        |
| SLC16A3    | C10orf54 | PROK2        | MARCO        | NTM          |
| ZNF611     | ARL14EPL | ZNF677       | LOC100505478 | MARCH1       |
| MARCH3     | ARHGAP9  | STMN3        | HAP1         | P2RY13       |
| METRNL     | ARHGAP12 | C15orf52     | BEST2        | C5orf32      |
| RBFOX2     | APOL6    | XYLT1        | LRP3         | NAV1         |
| TRIM69     | APBB1IP  | SRSF12       | LOC780529    | CCL24        |
| CSF3R      | AP1S2    | CCRL1        | FAT4         | KIAA1239     |
| HPCAL1     | ALOX5AP  | SMO          | C10orf116    | LOC100287628 |
| TUBA1A     | ADGRG5   | SLAIN1       | OR2J3        | TYROBP       |
| PTGER2     | ADGRG3   | RHOBTB1      | PYHIN1       | LY96         |
| FCGR1B     | ACSL1    | FLJ45482     | FAM53A       | AVPR1B       |
| GGT5       | ACPP     | GPR125       | OR1J4        | CCDC65       |
| CYTH4      |          | C21orf96     | VIT          | TDRD12       |
| ITGAX      |          | DST          | CHST15       | MYPN         |
| METTL23    |          | LOC100128252 | XPNPEP2      | BHMT2        |
| LACTB      |          | ZNF493       | DEFB125      | IL10RA       |
| CD82       |          | LOC388692    | LOC100129029 | GLTPD2       |
| PNRC1      |          | ITGAV        | LOC348751    | CALD1        |
| ST6GALNAC6 |          | ZNF219       | MICAL2       | NOD2         |
| RNASE6     |          | NCRNA00260   | FCRLB        | LOC283484    |
| TSSK3      |          | CD99P1       | HSD17B3      | UNC93B1      |
| RETN       |          | PAWR         | BASE         | ZSCAN12P1    |
| BNIP3      |          | ANGPT1       | OR1A2        | LOC100293532 |
| TBC1D30    |          | AK4          | CLEC4E       | C19orf59     |
| RASA4      |          | NPDC1        | C20orf85     | LOC100506714 |
| COIL       |          | PHOSPHO2     | GNAT2        | LOC388948    |
| EHBP1L1    |          | MANEAL       | PDE4A        | MOGAT1       |
| GPR114     |          | TCEA2        | APOBEC3A     | KIAA0087     |
| MRAP2      |          | SLITRK4      | C14orf86     | ZFHX3        |
| MED13L     |          | ABCA2        | NXPH2        | CDH7         |
| HK1        |          | ZNF667       | OR10D3       | COL8A2       |
| MS4A6A     |          | SEMA4C       | POU3F3       | SPRR2G       |
| LILRB1     |          | H2BFXP       | ARMC9        | TLR8         |
| CD244      |          | LOC100505687 | FAM26D       | PDZD3        |
| GLO1       |          | RNF217       | SIGLEC15     | C5orf47      |

TM6SF1  
SLC2A3  
TLR6  
WIFI1  
KLF10  
RCAN3  
SLCO3A1  
ITGA5  
TSC22D3  
PARP12  
FURIN  
APOBEC3F  
MIR3161  
BCL6  
TXNIP  
NOG  
STAT6  
SESN2  
HSPA1A  
IL13RA1  
TLE4  
TP53BP2  
ZEB1  
SSH3  
PPP1R26  
MIR520F  
DNMBP  
NLRC4  
P2RY2  
UBL3  
LTA4H  
GBGT1  
SLC39A14  
QPRT  
ICAM1  
ADD2  
PLOD1  
DENND5A  
ITGAM  
TNFRSF10B

GPR162  
CPNE8  
MCHR2  
C11orf95  
DCBLD2  
CHST12  
LOC727916  
LOC100507266  
UCN  
TMSB15B  
GPR27  
P2RY11  
BAG2  
LOC100272216  
C14orf128  
ZCCHC18  
SPNS2  
C15orf5  
ZNF395  
NGFRAP1  
MMP2  
LAMB2P1  
KIAA1683  
CHD7  
NOXA1  
PKIA  
ADARB1  
WBP5  
SMAD5  
FGFRL1  
JMY  
NCRNA00173  
TMEM22  
CXXC5  
LOC100288152

GJA10  
OR4D2  
HTATIP2  
PRLR  
LOC149703  
LILRB2  
NCALD  
NAP5B  
CCDC64B  
SGMS2  
KNG1  
CLCN1  
FBXL21  
POU5F1P3  
MEIG1  
SLC7A13  
TAS2R41  
SLAMF7  
NLRP2  
CSTA  
EME2  
HK3  
GRM2  
PAX7  
NCR1  
LOC100506795  
PRICKLE3  
RHBDL2  
C16orf89  
PRLHR  
LGALS13  
PKIB  
TAF7L  
ASGR1  
VGLL3  
GAS1  
ARL5C  
DNAJC15  
LRRC18  
JOSD2  
CYBB  
ZFYVE28  
ISG15  
ARMC3

TMEM150B  
GLDC  
SLC22A2  
CAPN9  
PRTN3  
TEAD2  
TRIM10  
MIPOL1  
APOC2  
GAGE3  
ACOT4  
FAM82B  
EPB41L2  
FBP1  
GCET2  
GNAL  
FPR3  
KBTBD8  
NCF4  
RGS10  
SLC25A41  
SIGLEC7  
SNX21  
HOXC13  
HIST1H3I  
SLIT1  
MS4A2  
LOC100216479  
LRP1  
CASQ1  
KRT78  
LRRC32  
BCL2L10  
HTR3A  
LOXL3  
SLC44A5  
LPPR5  
TSPAN16  
CALCB  
SAMHD1  
FAS-AS1  
PHLDB2  
TFR2  
AGR2

|              |           |
|--------------|-----------|
| SIGLEC16     | ZBTB38    |
| C3orf43      | C14orf184 |
| CFP          | PLTP      |
| CD14         | ZNF536    |
| C17orf46     | IL1RL2    |
| IRG1         | C21orf116 |
| KRT12        | FLJ42709  |
| TLR5         | FCGR2A    |
| RIMS1        | C5orf20   |
| LAIR2        | ACOX2     |
| PANK1        | CECR1     |
| AQP9         | SLC6A12   |
| KRT80        | NFAM1     |
| GPR65        | HERC2P3   |
| FCAR         | CD1C      |
| SPEM1        | SLC2A12   |
| OR2F1        | ALOX5AP   |
| AZU1         | NOTCH4    |
| LOC339535    | DAP       |
| KCNA5        | EPHB3     |
| HLA-DRB6     | QPCT      |
| MYCL1        | GPR68     |
| NTN4         | MX1       |
| AKR1B1       | FCER1G    |
| KLF5         | CD101     |
| MYL1         | LOC643529 |
| STATH        | DOCK10    |
| DUOX2        | TREM2     |
| CHRM1        | LOC730091 |
| SLC37A2      | PDPN      |
| HSD17B6      | CSN1S1    |
| VNN2         | GCHFR     |
| RNASE2       | LRRIQ3    |
| LOC151174    | HLA-DPB2  |
| RRAD         | SSTR4     |
| SLC34A1      | ZNF518B   |
| CCR4         | MS4A4A    |
| COL4A1       | IL12RB1   |
| LOC100287114 | FLJ32790  |
| DGAT2        | ST7OT4    |
| LHFPL1       | DHRS9     |
| CYP51A1      | A2LD1     |
| CRNN         | GP1BA     |
| ATP10A       | GLB1L     |

|              |               |
|--------------|---------------|
| HAVCR1       | DKFZP761C1711 |
| PTGDS        | THBS4         |
| LOC100507244 | TRIM72        |
| FCN3         | PRDM13        |
| SLC26A9      | TMEM130       |
| CLEC4D       | RTP4          |
| MGAM         | C12orf5       |
| AXDND1       | ACAT1         |
| LACRT        | LYVE1         |
| CYP2C8       | GRIN2A        |
| CCL17        | LRP1B         |
| OSCAR        | CTSS          |
| C17orf59     | MS4A14        |
| LOC254099    | KCNN3         |
| CRYBA1       | CRB1          |
| KRTAP10-11   | LPAL2         |
| STEAP4       | PDLIM1        |
| ZSCAN4       | ILIRB1        |
| CDO1         | HLA-DPB1      |
| VGF          | LOC386597     |
| C21orf128    | HBZ           |
| CHST7        | IL5RA         |
| TFPI2        | HVCN1         |
| GADL1        | GKN2          |
| CXADR        | HLF           |
| CLEC7A       | ENC1          |
| LOC100133790 | LOXHD1        |
| ALDH2        | IL2RG         |
| FCHO1        | TMEM47        |
| LOC100132116 | GALC          |
| EPHX1        | PNP           |
| GIMAP6       | LPAR6         |
| OR7E24       | ABCA9         |
| ST5          | FRMD3         |
| C6orf58      | SLC22A23      |
| S100A9       | HAVCR2        |
| CDH18        | NLRP12        |
| KIAA0930     | LOC284865     |
| SLC41A1      | BST1          |
| PRAMEF10     | EDNRA         |
| CLEC4F       | WNK2          |
| OVOL2        | C1orf53       |
| RPL39L       | PSRC1         |
| MARCH2       | RFPL1         |

|              |              |
|--------------|--------------|
| HCP5         | PIK3R5       |
| NEFM         | C20orf103    |
| CYP46A1      | FAM19A4      |
| ATP1A2       | CACNG4       |
| NHSL2        | MGC2848      |
| KLF4         | ADAP2        |
| KIAA1274     | SLFN13       |
| LOC729970    | TMC4         |
| RBM11        | SLC26A7      |
| C2orf46      | TMEM144      |
| ABCG2        | CD200R1      |
| KIR3DL3      | CDHR3        |
| LOC644714    | LOC100131262 |
| AFF3         | BPIL2        |
| C15orf56     | CD1E         |
| TAC4         | TSHZ3        |
| CR2          | C1orf170     |
| ALB          | SMPD3        |
| PCDHB16      | MECOM        |
| CLEC1A       | CUX2         |
| ROBO1        | SH2D1A       |
| LOC100128343 | SH3D21       |
| ATP6V0D1     | MEGF9        |
| HCG11        | SLC2A8       |
| NPC1L1       | GAPDHS       |
| EVC          | GRID2        |
| HES6         | CSF2RA       |
| SEMA3C       | LOC286121    |
| LOC728192    | NCF2         |
| PNLIIPRP3    | LST1         |
| ASAH2B       | DOK2         |
| BTBD17       | ZNF185       |
| INSM2        | HEXIM2       |
| IER3         | CLEC12B      |
| CLDN6        | BLNK         |
| KANK4        | RIBC2        |
| POM121L12    | CDC42BPB     |
| UMODL1       | GPR15        |
| FUJ35024     | TEAD1        |
| PAH          | RNASE1       |
| LOC100507391 | C1orf46      |
| TMEM145      | FCGR2B       |
| ARSI         | C19orf26     |
| HTR6         | UGT8         |



|              |              |
|--------------|--------------|
| CDH13        | MICAL1       |
| CYBA         | PRSS47       |
| ZNF703       | KIF16B       |
| LOC100287030 | NUDT19       |
| APOF         | C7orf57      |
| HIST1H2AL    | DPPA4        |
| LOC728114    | APOL4        |
| PEBP4        | SRL          |
| GPRC5A       | LOC151438    |
| TTLL13       | FAM105A      |
| TRIM29       | PAK6         |
| C2orf3       | SLC24A4      |
| AKAP5        | DYSF         |
| LOC728805    | LOC100505826 |
| ADORA3       | AKAP7        |
| MAG          | IFI44        |
| MYBPC2       | SERPIND1     |
| ASPA         | CSF3         |
| PADI4        | KRT35        |
| CYP2C18      | BTNL8        |
| LOC645323    | PIH1D2       |
| PCDHGA9      | LOC284788    |
| LOC100131496 | TCEANC2      |
| NOS1AP       | MYOF         |
| HPR          | NPL          |
| ALMS1P       | PFKFB2       |
| RBP7         | PRAME        |
| GDAP1L1      | OR7E19P      |
| SCGB2A1      | ZNF385A      |
| RPL10L       | TPPP2        |
| OR2J2        | UBASH3B      |
| SHC3         | CD300C       |
| PADI2        | ZNF684       |
| DBH          | NEK6         |
| C19orf47     | HNF1B        |
| SGSH         | LIPA         |
| S100A8       | KCNB2        |
| HOXC6        | TUBA4A       |
| GPRIN1       | NAAA         |
| FCGR3B       | DENND2A      |
| HOXD8        | FUJ25328     |
| MEOX2        | SNX29        |
| SLC11A1      | SERPINF1     |
| MS4A7        | INTS4L1      |

|              |              |
|--------------|--------------|
| LPXN         | LOC100129794 |
| CNTNAP1      | SPATA12      |
| GNS          | VSTM1        |
| VSIG4        | SIGLEC11     |
| HLA-DPA1     | DHRS3        |
| C2           | STARD8       |
| MMP13        | ATP10B       |
| DRP2         | CMTM2        |
| KIAA1755     | CMKLR1       |
| GCH1         | RNF175       |
| TMEM200A     | CD300LB      |
| GIMAP1       | RASSF4       |
| CLC          | CLTCL1       |
| ODF4         | RAPGEF5      |
| B3GALT4      | S100P        |
| HIC1         | MMEL1        |
| AIM1         | CR1          |
| SYCN         | LOC200772    |
| DKFZp547J222 | IL1RN        |
| PNOC         | GPBAR1       |
| BASP1        | LOC100287547 |
| CCDC19       | WFDC6        |
| C15orf55     | NLRP14       |
| DUSP9        | P2RY6        |
| ADIG         | FCGRT        |
| LPCAT1       | BRSK1        |
| S100A1       | C3orf45      |
| PDC          | FERD3L       |
| SH3PXD2A     | ZNF167       |
| ARC          | PP14571      |
| TRPM8        | EPOR         |
| OR5P3        | FLJ20712     |
| ST14         | RNH1         |
| GLT1D1       | FCGR2C       |
| HNMT         | ERCC2        |
| ZNF705G      | PTPRT        |
| LOC400238    | MRPS15       |
| CALHM3       | LOC100505967 |
| LOC100129058 | AIG1         |
| CC2D2A       | F5           |
| MAGEB18      | C10orf128    |
| STAB1        | ANKRD53      |
| NUDT16P1     | RHBDL3       |
| LRRC29       | CTSH         |

|              |           |
|--------------|-----------|
| PACRG        | C17orf51  |
| SLITRK2      | MPEG1     |
| EDDM3B       | ACER1     |
| DOK3         | CDH23     |
| PILRA        | MLF1      |
| SLC26A4      | KAZN      |
| PRSS50       | CCR2      |
| GPR158       | CXCL9     |
| LOC100130452 | ZFP90     |
| VCX2         | TMEM104   |
| LILRA6       | PALM3     |
| ANKRD45      | PTPRE     |
| ZFR2         | LOC338667 |
| NLRC5        | ADAMTS16  |
| CNN3         | CIDEB     |
| NCRNA00189   | TEX13A    |
| FGR          | GIPC2     |
| LOC285857    | AP1S3     |
| C16orf81     | NEB       |
| HLA-DOA      | PPARD     |
| CFHR4        | SPINT2    |
| OR12D2       | SIDT2     |
| DIO3         | CEBPE     |
| STAB2        | ENHO      |
| MIA2         | CARD16    |
| SLCO5A1      | ILDR1     |
| CREB5        | HIVEP3    |
| PEG3-AS1     | LAX1      |
| GRN          | TLR10     |
| SUCLG2       | ESPN      |
| DAPL1        | ADPRH     |
| USP18        | HENMT1    |
| ANKRD30A     | CACNA2D3  |
| MDGA2        | FAP       |
| OR2L1P       | LGALS3BP  |
| KLHDC7B      | C12orf74  |
| ANXA2P2      | RFX6      |
| NPBWR1       | C20orf27  |
| ZIC4         | SLAMF6    |
| C7orf10      | KIAA0319  |
| CD4          | DLGAP1    |
| RXRA         | KLK14     |
| SLC5A12      | ENTPD3    |
| IL23R        | S100B     |

|           |            |
|-----------|------------|
| IFIT1     | SLC30A1    |
| SERPINB9  | NRP1       |
| SCGB1A1   | SNX11      |
| C10orf113 | CPS1-IT    |
| ZNF438    | PRRG3      |
| ANGPTL6   | MPV17L2    |
| ADH6      | NPTX2      |
| KIR2DL2   | TGFB1      |
| GRHL1     | CTNNA3     |
| ARTN      | MOSC2      |
| LGALS3    | UNC13A     |
| LILRA1    | GSTA3      |
| SGCZ      | SEMA4A     |
| ESRP1     | DDAH1      |
| KRTAP3-3  | LOC284930  |
| STXBP2    | LOC150622  |
| NR1I2     | KIAA1024   |
| SCN4B     | BOLA3      |
| NCF1C     | PAOX       |
| TRIP6     | MTFP1      |
| MNDA      | KATNAL2    |
| C10orf27  | CAMK2A     |
| HSF5      | ZNF239     |
| ASZ1      | C1orf54    |
| SPIN2A    | LOC339760  |
| TLX2      | LOC157860  |
| FGF8      | PRAP1      |
| IGSF6     | CETP       |
| GPX5      | CLCN5      |
| CLPB      | LILRB4     |
| IGSF5     | LOC339593  |
| RIPPLY2   | NCRNA00028 |
| KL        | POU4F1     |
| FAM107B   | CCR6       |
| TYMP      | GPR18      |
| SOX3      | RCBTB2     |
| NGB       | SMAD6      |
| MEGF10    | MS4A6A     |
| LOC646484 | MSLN       |
| FAM65B    | HLA-DMB    |
| SERPINA1  | TACSTD2    |
| B3GNT3    | AK7        |
| WNT5B     | PGR        |
| C13orf18  | ZNF517     |

|           |           |
|-----------|-----------|
| PTPRN2    | CYB5R1    |
| KBTBD5    | KRT73     |
| TRIM7     | MYH11     |
| CSAR1     | LIPC      |
| TBL1Y     | PM20D1    |
| NBPF8     | C20orf166 |
| LOC284798 | PACSIN3   |
| STX11     | LSM14B    |
| HLA-DQB1  | CKM       |
| C2orf50   | ZNRF2     |
| BAIAP2L1  | CAND2     |
| ODZ3      | OTUD7B    |
| DOCK1     | PGAM2     |
| GOLGA6A   | METTL7B   |
| RANBP17   | LOC284837 |
| GGT5      | CD180     |
| LOC401176 | LOC284998 |
| UMOD      | SLC16A6   |
| GALR1     | IRF8      |
| COL23A1   | MX2       |
| PPM1M     | LOC503519 |
| MCOLN1    | CCRL2     |
| C3orf48   | GNG4      |
| RIMKLB    | S100A16   |
| FAM46D    | CCDC26    |
| FAM3B     | TIFAB     |
| LPAR5     | DLGAP3    |
| HSPA6     | SPZ1      |
| HHLA2     | OSTBETA   |
| SLC15A3   | AP2S1     |
| FABP1     | CHST2     |
| ZSCAN10   | HAPLN4    |
| RHOU      | CCND1     |
| LOC283112 | KIAA1409  |
| LOC643763 | TACC2     |
| CCR1      | NPB       |
| ANXA6     | ZNF642    |
| EYA2      | OASL      |
| CA5A      | ZMAT4     |
| SRRM3     | GMPPB     |
| SUN3      | JPH1      |
| C9orf72   | F8        |
| FAAH      | ENTPD1    |
| SLC27A3   | CDH3      |

|              |              |
|--------------|--------------|
| KCTD4        | FAM71F1      |
| OR51B4       | ADAMTS18     |
| B3GAT1       | HYLS1        |
| C1orf111     | PRG2         |
| GPER         | CALR3        |
| TNNI2        | CDH17        |
| PDGFRA       | KMO          |
| MANSC1       | CACNA2D4     |
| C15orf62     | KLHL29       |
| LY6G6D       | HIGD1B       |
| CST7         | ZNF57        |
| NME3         | PCDH19       |
| LOC100127974 | SNCB         |
| HSPB1        | ACY3         |
| CST3         | CYP4F2       |
| LTK          | BACE2        |
| EFS          | LOC729683    |
| LOC100288860 | TLR7         |
| CDK20        | GALR2        |
| PAX4         | DDO          |
| GRB14        | ATF7IP2      |
| ZNF750       | C3orf20      |
| OR2F2        | CNDP2        |
| LOC100505540 | GNGT2        |
| ARHGAP24     | PPT1         |
| MAP7D2       | TAGLN        |
| LHX9         | LOC100128025 |
| GALM         | MYBPC1       |
| LDLR         | PFKFB4       |
| FRMD4A       | FAM200B      |
| IPCEF1       | CXCR2        |
| TNFSF12      | FARP1        |
| HRH1         | UPK3A        |
| HMGB4        | PCDHGC4      |
| MGAT5        | OTP          |
| TNFSF8       | CLECSA       |
| GPX3         | NAGA         |
| SEMA3G       | CLEC12A      |
| SYT4         | GSTTP1       |
| TBC1D9       | IGFBPL1      |
| FLJ39632     | EPSTI1       |
| C2orf58      | SIPA1L2      |
| TSPO         | KYNU         |
| RAB3B        | MACC1        |

|  |  |                                                                                                                                                                                                                                                                                           |                                                                                                                                                                                                                                                                                           |  |
|--|--|-------------------------------------------------------------------------------------------------------------------------------------------------------------------------------------------------------------------------------------------------------------------------------------------|-------------------------------------------------------------------------------------------------------------------------------------------------------------------------------------------------------------------------------------------------------------------------------------------|--|
|  |  | FPR2<br>BPI<br>ITGAL<br>ZNF442<br>TNFAIP6<br>CD96<br>LOC283485<br>OTUB2<br>PCDH7<br>CLSTN2<br>LILRA2<br>ZNF815<br>C6orf124<br>TNMD<br>FIGF<br>LOC339316<br>SAA3P<br>ACE2<br>GPNMB<br>RBP3<br>HLA-DRA<br>CDA<br>EPYC<br>NT5E<br>TDRD7<br>ANO1<br>UROC1<br>LOC285286<br>CLEC10A<br>C9orf144 | LOC116437<br>OAS2<br>STYK1<br>CLDN17<br>LOC400128<br>LY86<br>CD93<br>ZNF555<br>NEXN<br>PI4K2A<br>EPX<br>SPRYD5<br>ME1<br>CAPN3<br>GTSF1<br>RETN<br>PLG<br>CXorf30<br>PTH2R<br>SLC26A8<br>SV2B<br>KIF17<br>SLC4A3<br>MTMR11<br>LOC100128501<br>ROGDI<br>DNAJA4<br>ST18<br>IL13RA2<br>MRVI1 |  |
|--|--|-------------------------------------------------------------------------------------------------------------------------------------------------------------------------------------------------------------------------------------------------------------------------------------------|-------------------------------------------------------------------------------------------------------------------------------------------------------------------------------------------------------------------------------------------------------------------------------------------|--|
