# Supplementary material for: Activation of Vitamin D Receptor Pathway Enhances Differentiating Capacity in Acute Myeloid Leukemia with Isocitrate Dehydrogenase Mutations
Source: MDPI journal article supplement (doi:10.3390/cancers13205243), 2021-10-19
Supplement: s1 [file s1]

**Table S4 : Gene signatures used for GSEA analysis**

| LATE_VD/VDR activation pathway (Warwick et al., 2021) |               |               |            |              |               | PID_RXR_VDR_PATHWAY (RXR and RAR heterodimerization with other nuclear receptor) |
|-------------------------------------------------------|---------------|---------------|------------|--------------|---------------|----------------------------------------------------------------------------------|
| MMP1                                                  | NWD1          | KIAA1211L     | CCR1       | RP11-4L24.4  | TGFB2         | ABCA1                                                                            |
| LYPLA1P2                                              | TMEM37        | RP11-133K1.12 | C5AR2      | PRLR         | HSH2D         | BCL2                                                                             |
| AC011290.4                                            | HBEGF         | GJD3          | OCEL1      | SLC31A1      | CIB3          | FAM120B                                                                          |
| FAM182A                                               | NCF1          | FAM179A       | LGALS9     | RP4-737E23.6 | MFAP4         | MED1                                                                             |
| CYP24A1                                               | AGAP13P       | RAPGEF3       | RET        | SCARB1       | ABCA1         | NCOA1                                                                            |
| CAMP                                                  | RP11-120M18.2 | LRRC3B        | PLEKHO1    | TMC6         | SORD2P        | NCOR2                                                                            |
| RFPL2                                                 | AGAP7P        | LPGAT1        | LRP1       | FAM134B      | EPHB6         | NR1H2                                                                            |
| MSI1                                                  | RP11-69J7.1   | PPARGC1B      | B3GNT8     | PPARG        | RP11-849F2.9  | NR1H3                                                                            |
| RP11-605F22.2                                         | DAPK2         | TMEM52B       | GLIPR1     | IPCEF1       | RGMA          | NR1H4                                                                            |
| LGALS9C                                               | CARD11        | NINJ1         | AC064834.1 | HTT          | SHANK1        | NR4A1                                                                            |
| NOVA2                                                 | ASAP2         | RP11-517P14.2 | FGD3       | RP5-862P8.2  | TMEM255A      | PPARA                                                                            |
| SULT1C2                                               | SPATA13       | C1orf132      | LNK1       | ANKRD10      | CSPG4         | PPARD                                                                            |
| SHE                                                   | ELL2          | QPCT          | SLC7A2     | ZNF608       | ADGRG5        | PPARG                                                                            |
| C3orf52                                               | RP5-1007H16.1 | LINC00659     | CTSZ       | TMEM176B     | MLPH          | RARA                                                                             |
| ADAMDEC1                                              | PDLIM4        | USP2          | SYT3       | TFE3         | MERTK         | RARB                                                                             |
| LGALS9B                                               | GNLY          | EFL1          | FANCE      | PKD2         | RP11-757G1.6  | RARG                                                                             |
| TDRD10                                                | AC011515.2    | LILRB4        | SKOR1      | GPT2         | C3AR1         | RPS6KB1                                                                          |
| CD14                                                  | PDGFA         | AC016735.2    | ADORA2BP1  | STS          | RP11-358L22.3 | RXRA                                                                             |
| ADAM28                                                | LRRC25        | MATN2         | ZCCHC2     | NMNAT2       | SERPINB2      | RXRB                                                                             |
| CLMN                                                  | CXCL8         | USP2-AS1      | RAB37      | ZNF44        | CDKN1C        | RXRG                                                                             |
| RP1-229K20.5                                          | PDZD7         | EFCAB12       | LBX2       | C20orf197    | CCR7          | SREBF1                                                                           |
| RP11-365P13.6                                         | CTNNA2        | CYP26B1       | MLXIPL     | PDZD2        | F3            | TGFB1                                                                            |
| TREM1                                                 | MARCKS        | RP11-356M20.1 | TFEB       | KIAA1683     | TRPC5OS       | THRA                                                                             |
| CD7                                                   | MIR635        | SMPDL3A       | SPATA9     | NCOR2        | MORF4L2-AS1   | THRB                                                                             |
| GPER1                                                 | OSM           | RP3-525N10.2  | GAS7       | RBM47        | OLFML3        | TNF                                                                              |
| KRT35                                                 | CRISPLD2      | SIGLEC17P     | TMEM243    | SH2D3C       | DPYSL3        | VDR                                                                              |
| CDH15                                                 | ALOX5         | ICAM1         | CYP19A1    | FGR          | AGMO          |                                                                                  |
| SLC12A1                                               | RP11-321E2.3  | CD300LB       | INTS6L     | HK1          | NTNG1         |                                                                                  |
| ABCB4                                                 | ANKRD22       | DLGAP1-AS1    | IRF5       | WWC2         | F13A1         |                                                                                  |
| CD274                                                 | AC109826.1    | MREG          | SCPEP1     | ANKRD10-IT1  | IL1R2         |                                                                                  |
| RN7SL834P                                             | BCAS4         | CTD-2521M24.8 | IGFLR1     | WIP1         | UNC79         |                                                                                  |
| RP11-598F7.3                                          | CDR2L         | RP1-95L4.4    | ITGB2      | LRIG1        | TCN1          |                                                                                  |
| FBP1                                                  | ARHGEF16      | SIRT4         | NFE2       | TRAF3IP3     | TMEM52        |                                                                                  |
| SLC37A2                                               | KCTD12        | PTGS1         | TNRC6C-AS1 | GADD45A      | RP5-1028K7.2  |                                                                                  |
| HRAT92                                                | THEMIS2       | RP11-432J24.5 | CCDC170    | SEPT3        | TRNP1         |                                                                                  |
| DENND6B                                               | PNOC          | DYSF          | KCTD17     | APBB2        | COL2A1        |                                                                                  |
| ABCD2                                                 | F12           | FUCA1         | C8orf31    | ROS1         | CH507-9B2.1   |                                                                                  |
| NEGR1                                                 | RP11-23J18.1  | LAMC3         | MIR570     | CCDC102A     | AF064858.8    |                                                                                  |

|               |                |           |               |                |               |
|---------------|----------------|-----------|---------------|----------------|---------------|
| CNR2          | PEX5L          | LILRA1    | WLS           | AC093642.3     | CCL3L3        |
| PDCD1LG2      | CXCL1          | CAV1      | SAT1          | RP11-960L18.1  | RP11-121A14.2 |
| FAM53B-AS1    | SEMA6B         | NCOA4     | LRRC8A        | ST3GAL4        | LINC01202     |
| TMEM151A      | EPB41L1        | IP6K3     | P2RX7         | TSPAN13        | HES1          |
| NTNG2         | ANOS2P         | ARSG      | NR1I3         | RTN4R          | SMIM1         |
| RP11-384O8.1  | ORM1           | AIG1      | RP11-43F13.3  | FBLN1          | KIRREL3       |
| BTNL9         | TESPA1         | SLC30A1   | CHCHD10       | FAM46C         | GGT5          |
| CXCL6         | TFAP2C         | SEL1L3    | CTSD          | RP11-1263C18.2 | RP11-403A3.3  |
| RHOH          | PDGFRL         | TRIO      | BCO2          | AC004987.9     | SLC9C2        |
| TRAF5         | APCDD1         | DNASE2    | RP11-301G19.1 | CTC-378H22.2   | NAP1L4P1      |
| SULF2         | ITGAM          | SYNJ2     | FRMD3         | PALD1          | LINC01046     |
| RP11-552D4.1  | NRG2           | MYO9B     | ZFP92         | TNFAIP3        | RPSAP9        |
| KCNF1         | RP11-23F23.2   | SIGLEC16  | RNF165        | FGFR3          | CCND1         |
| CD248         | TLE6           | SP100     | CCRL2         | CD6            | TNFRSF19      |
| ROPN1B        | CTD-2342N23.3  | LMF1-AS1  | BCL6          | EMID1          | CCL3          |
| SLC16A6       | TRIM38         | CDA       | ACSL1         | IL17RE         | RP11-467J12.4 |
| ARL5C         | CD52           | HIVEP2    | CDK18         | BEX1           | SIM1          |
| NBEAP1        | NAPSB          | IGFBP7    | TBC1D2        | SIX3           | FAP           |
| RP11-982M15.7 | RP11-728F11.4  | CHST2     | C1orf101      | MEGF6          | BMP2          |
| RP5-1116H23.3 | SPOCK1         | THBD      | LGI2          | LINC00884      | BTBD11        |
| GRPR          | AC000403.4     | CD79B     | KCNK5         | UGT3A2         | DEPTOR        |
| AC093609.1    | GMPR           | GOS2      | MGAT4A        | FOLR1          | CXCR3         |
| ORM2          | RP11-309L24.10 | MIR646HG  | ADGRB3        | NXT2           | PLEKHA1       |
| KCNK13        | ITSN1          | ZNF589    | GM2A          | RP11-96C21.2   | RP11-55K13.1  |
| TUBB4A        | GABRG2         | CECR1     | TMEM169       | PLCB4          | RP11-445F6.2  |
| RP11-429J17.7 | CD38           | KIAA1324L | OTOF          | MTSS1L         | LOH12CR2      |
| AC021218.2    | RP11-259K5.2   | PTAFR     | SLC24A4       | GSN            | MGAT4C        |
| CPB2          | RAVER2         | PLXDC1    | PPARGC1A      | CHST4          | RP11-572C15.5 |
| NCF1C         | NCF1B          | TMEM156   | FBXO41        | PRR5L          | RP5-1185I7.1  |
| SPP1          | CASC9          | SFXN3     | TMEM38A       | NPTX1          | CTD-3116E22.8 |
| ACVRL1        | FXYD6          | TMEM176A  | RP11-124O11.1 | HES2           | KANK4         |
| HP            | TRIM2          | RASSF2    | RP5-892K4.1   | TRGC2          | RNU1-22P      |
| LINC00304     | PLA2G16        | NLRC4     | CACNB1        | SEMA6A         | OCSTAMP       |
| SLC17A7       | ITGB5          | PNPLA1    | LPO           | KHDRBS3        | RP1-136B1.1   |
|               | SLC6A12        | OXER1     | SERPINB1      | GPR176         | CRYM          |
|               | RP11-321E2.4   |           |               | WI2-87327B8.2  | RP11-651L5.3  |
