# Supplementary material for: Activation of Vitamin D Receptor Pathway Enhances Differentiating Capacity in Acute Myeloid Leukemia with Isocitrate Dehydrogenase Mutations
Source: MDPI journal article supplement (doi:10.3390/cancers13205243), 2021-10-19
Supplement: s1 [file s1]

# Supplementary Materials: Activation of Vitamin D Receptor Pathway Enhances Differentiating Capacity in Acute Myeloid Leukemia with Isocitrate Dehydrogenase Mutations

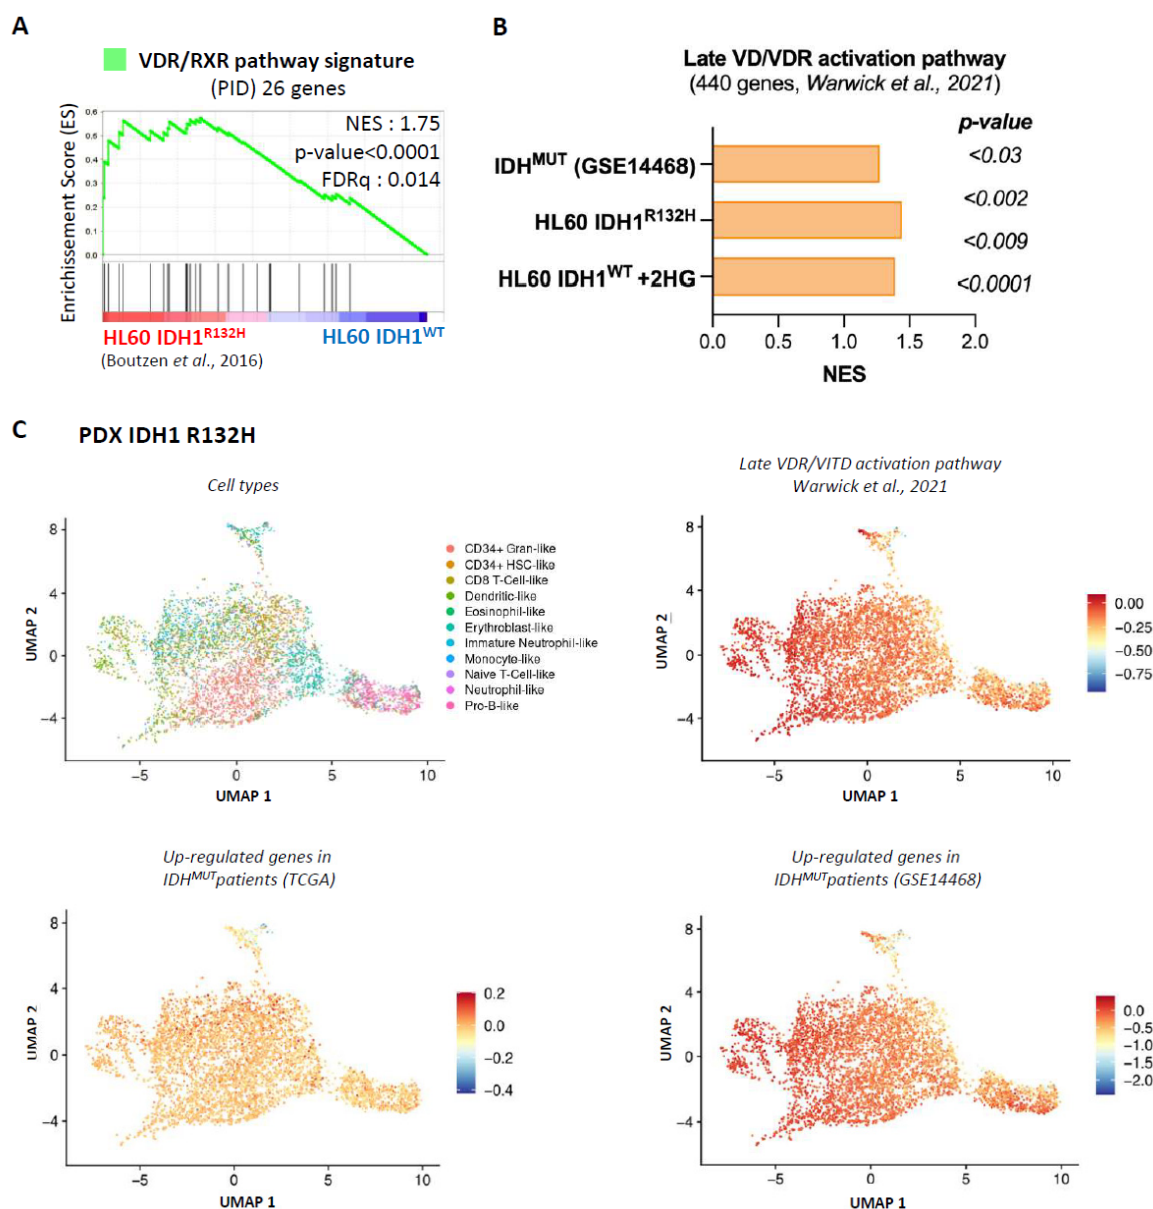

**Figure S1.** Vitamin D receptor-related gene signatures are enriched in transcriptomes of IDH mutant cells. (A) GSEA of VDR/RXR pathway signature in HL60 IDH1<sup>R132H</sup> versus HL60 IDH1<sup>WT</sup>. (B) Gene Set Enrichment Analysis (GSEA) of Late VD/VDR activation pathway signature in HL60 IDH1<sup>R132H</sup>, HL60 IDH1<sup>WT</sup> treated with 2HG and in IDH<sup>MUT</sup> patients from GSE14468 related to Figure 1C (C) UMAP of scRNA-seq analysis of PDX IDH1<sup>R132H</sup> according to cell types, Late VD/VDR activation pathway signature and IDH<sup>MUT</sup> signatures generated from two independent public cohorts (TCGA and GSE14468).

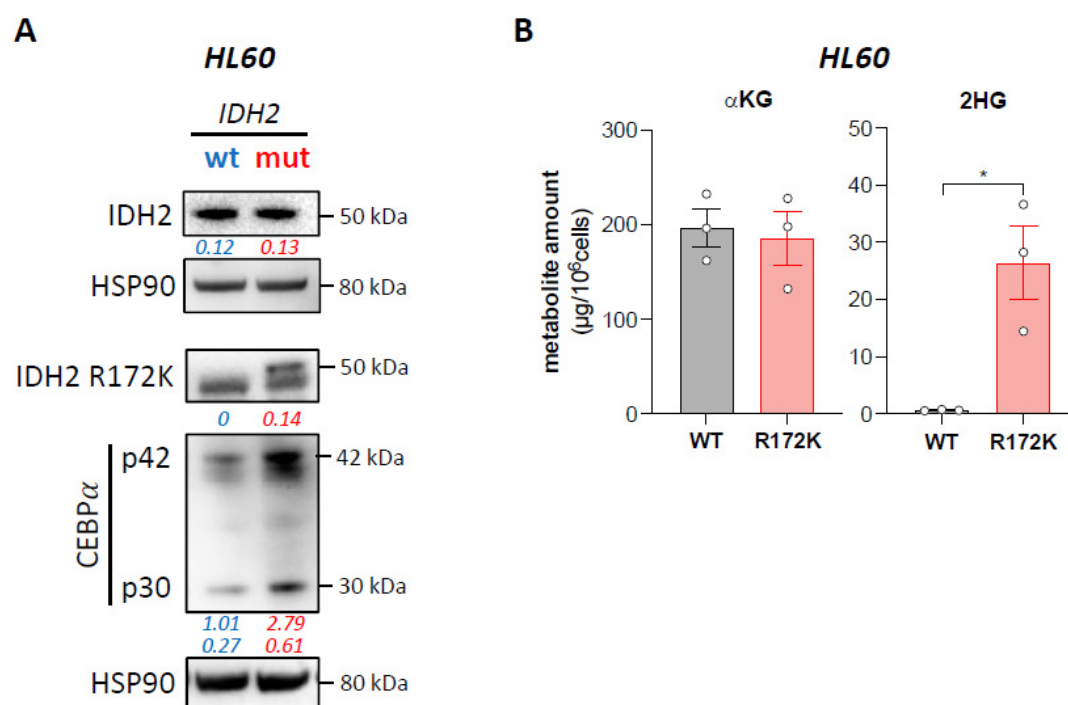

**Figure S2.** Generation of HL60 expressing IDH2<sup>WT</sup> or IDH2<sup>R172K</sup>. (A) Western blot showing protein levels of IDH2, IDH2 R172K and CEBP $\alpha$  in HL60 IDH2<sup>WT</sup> versus HL60 IDH2<sup>R172K</sup>. (B) Quantification of  $\alpha$ KG and 2HG in HL60 IDH2<sup>WT</sup> versus IDH2<sup>R172K</sup>. The uncropped western blot figures were presented in Figure S6.

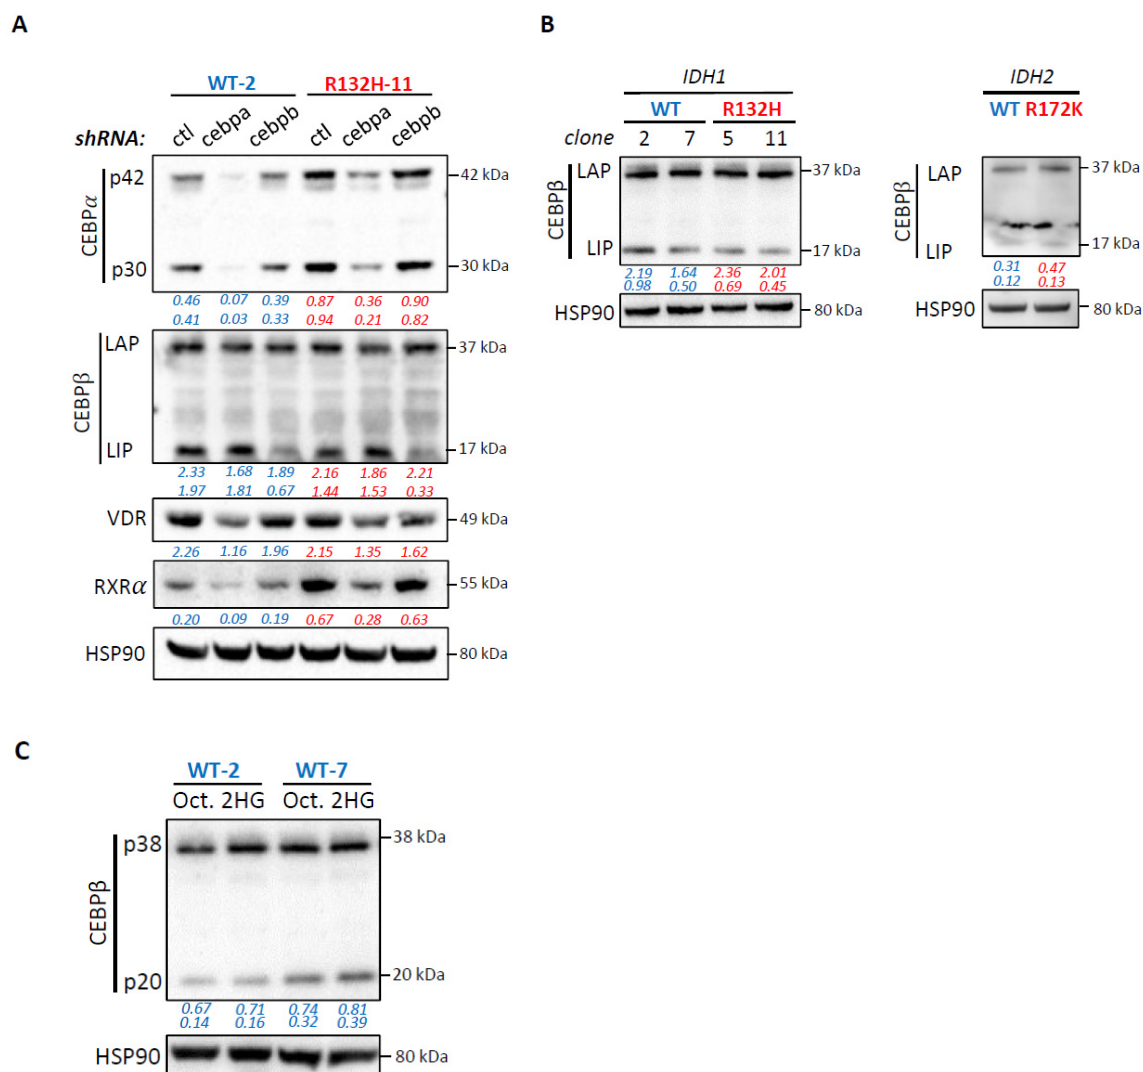

**Figure S3.** IDH mutations activate CEBPα-VDR-RXRα axis through 2HG production. (A) Western blot showing levels of CEBPα, CEBPβ, VDR and RXR α in HL60 IDH1<sup>WT</sup>-2 versus HL60 IDH1<sup>R132H</sup>-11 after CEBPA-KD and CEBPB-KD. (B) Western blot showing levels of CEBPβ in HL60 IDH1<sup>WT</sup> versus HL60 IDH1<sup>R132H</sup> and in HL60 IDH2<sup>WT</sup> versus HL60 IDH2<sup>R172K</sup>. (C) Western blot showing levels of CEBPβ in HL60 IDH1<sup>WT</sup> treated for 1 week with 2HG (200 μM). The uncropped western blot figures were presented in Figure S6.

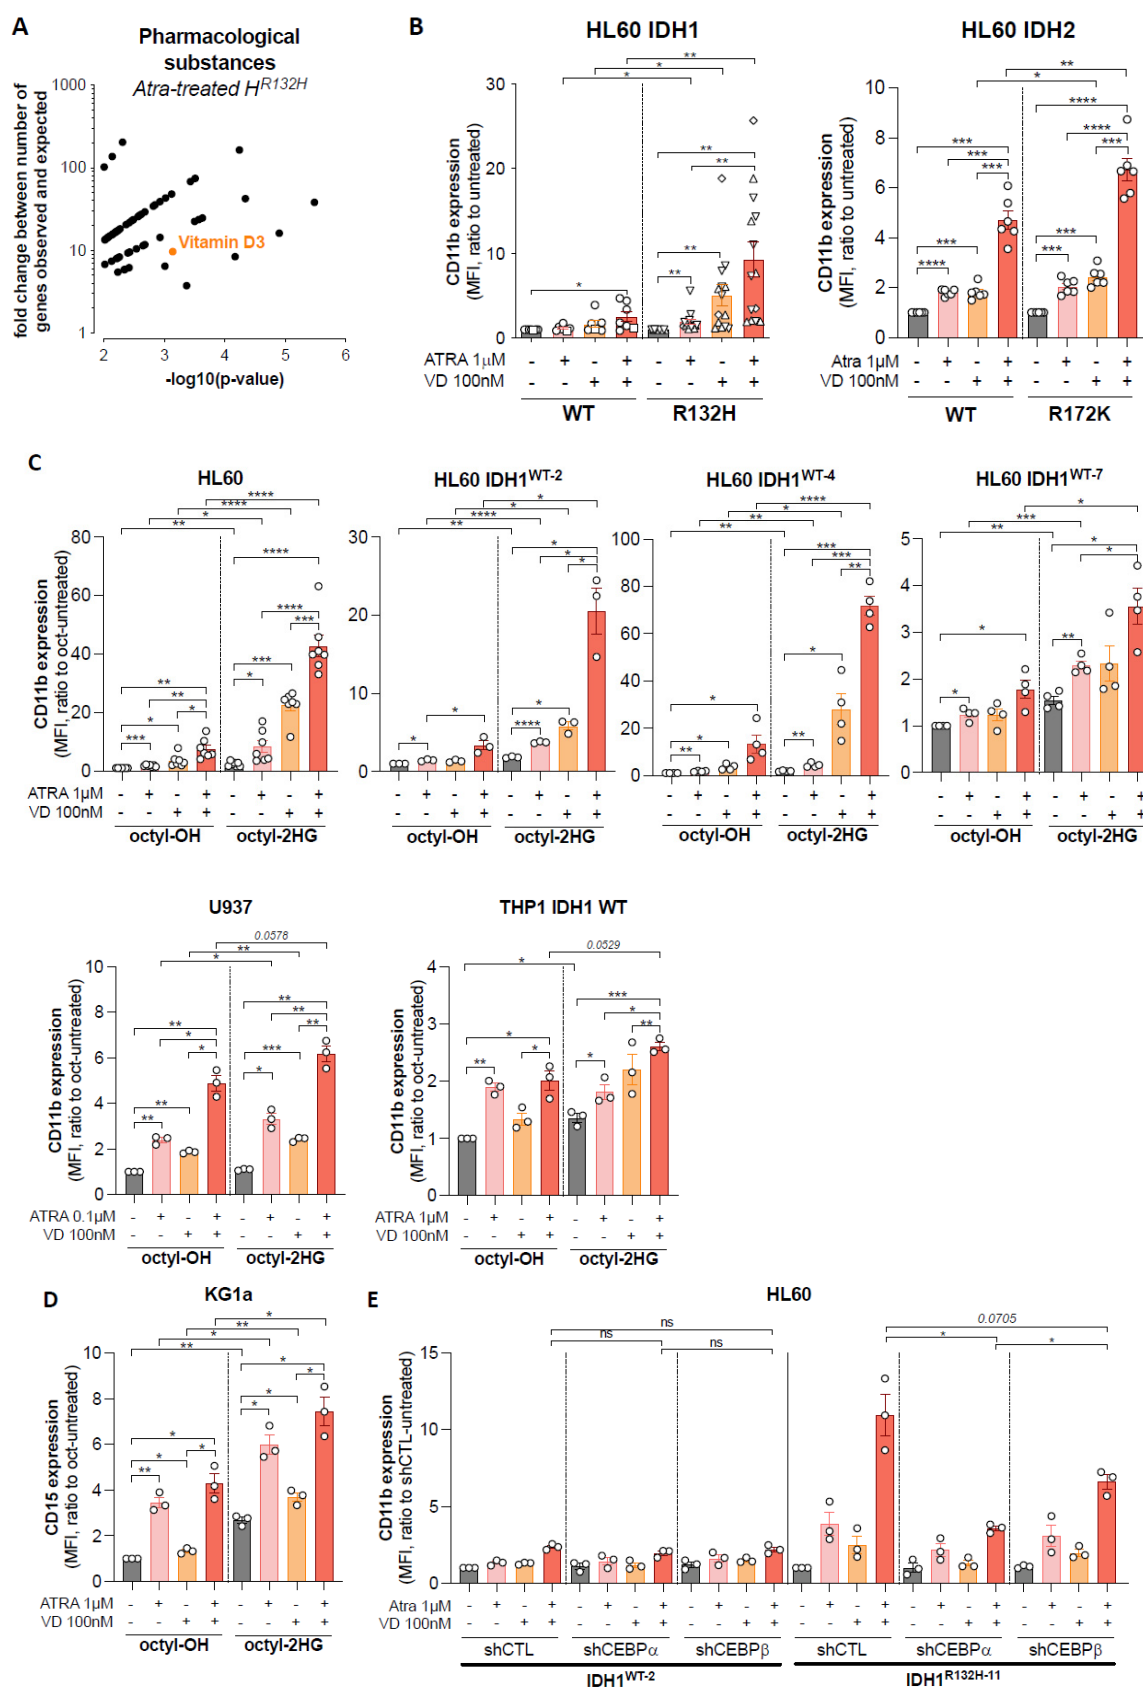

**Figure S4.** Targeting vitamin D receptor pathway enhances anti-AML effect with ATRA in a CEBPα-dependent manner. (A) Pharmacological substances (Genomatix) enriched in gene signature of ATRA-treated HL60 IDH1<sup>R132H</sup> ( $H^{R132H}$ ) (B) CD11b expression (MFI) measured by flow cytometry in

HL60 IDH1<sup>WT</sup> (clone 2: ○, clone 7: □) versus HL60 IDH1R132H (clone 5: ◇, clone 11 GFPLOW: △, clone 11 GFPHIGH: ▽) and in HL60 IDH2<sup>WT</sup> versus HL60 IDH2<sup>R172K</sup> treated for 3 days with ATRA (1 µM) and VD (100 nM) alone or in combination. (C) CD11b expression (MFI, ratio to untreated) measured by flow cytometry in 2HG-treated (100(U937)-200µM for 1week) HL60 IDH1WT-2, HL60 IDH1WT-4, HL60 IDH1WT-7, HL60, U937 and THP1 treated for 3 days with ATRA (0.1µM for U937, 1µM for others) or VD (100nM) alone or in combination. (D) CD15 expression (MFI, ratio to untreated) measured by flow cytometry in 2HG-treated (200µM for 1week) KG1a treated for 3 days with ATRA (0.1µM for U937, 1 µM for others) or VD (100nM) alone or in combination. (E) CD11b expression (MFI) measured by flow cytometry in HL60 IDH1<sup>WT-2</sup> shCTL vs. shCEBPα vs. shCEBPβ and in HL60 IDH1R132H-11 shCTL vs. shCEBPα vs. shCEBPβ treated for 3 days with ATRA (1 µM) and VD (100 nM) alone or in combination. \*: <0.05; \*\*: <0.01, \*\*\*: <0.005; \*\*\*\*: <0.001.

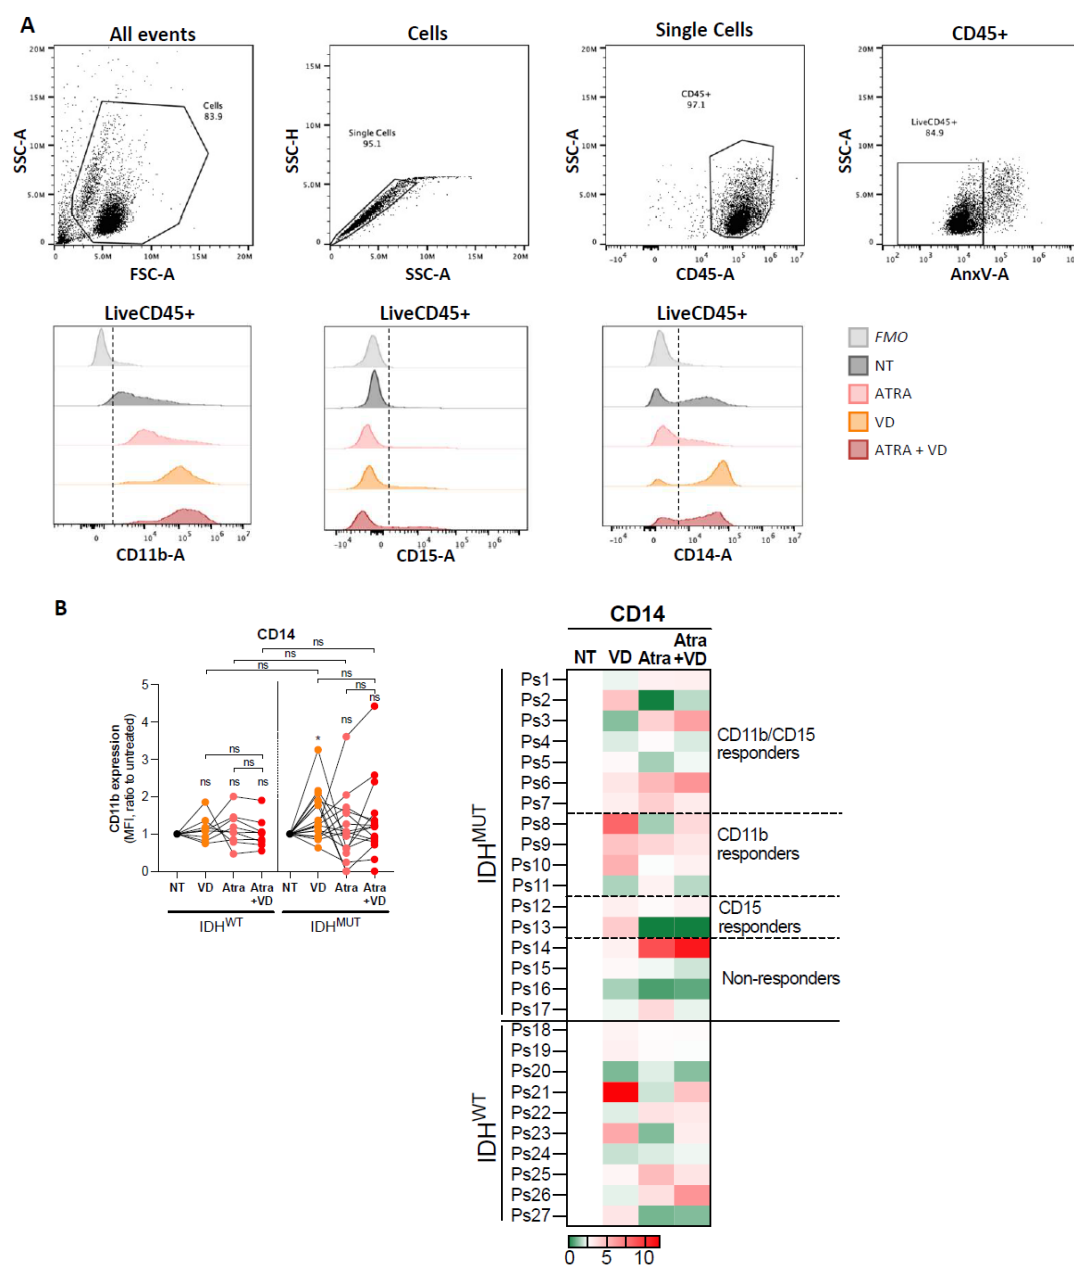

**Figure S5.** Targeting vitamin D receptor pathway enhances anti-AML effect with ATRA in IDH<sup>MUT</sup> AML patients. **(A)** Representative gating strategy to measure CD11b, CD15 and CD14 expressions by flow cytometry in Ps8 treated with ATRA and VD alone or in combination. **(B)** CD14 expression (mean fluorescence intensity, MFI) measured by flow cytometry in IDH<sup>MUT</sup> versus IDH<sup>WT</sup> patients treated with ATRA and VD alone or in combination (left panel). Results for each patient are represented individually (right panel).

**Figure S2A**

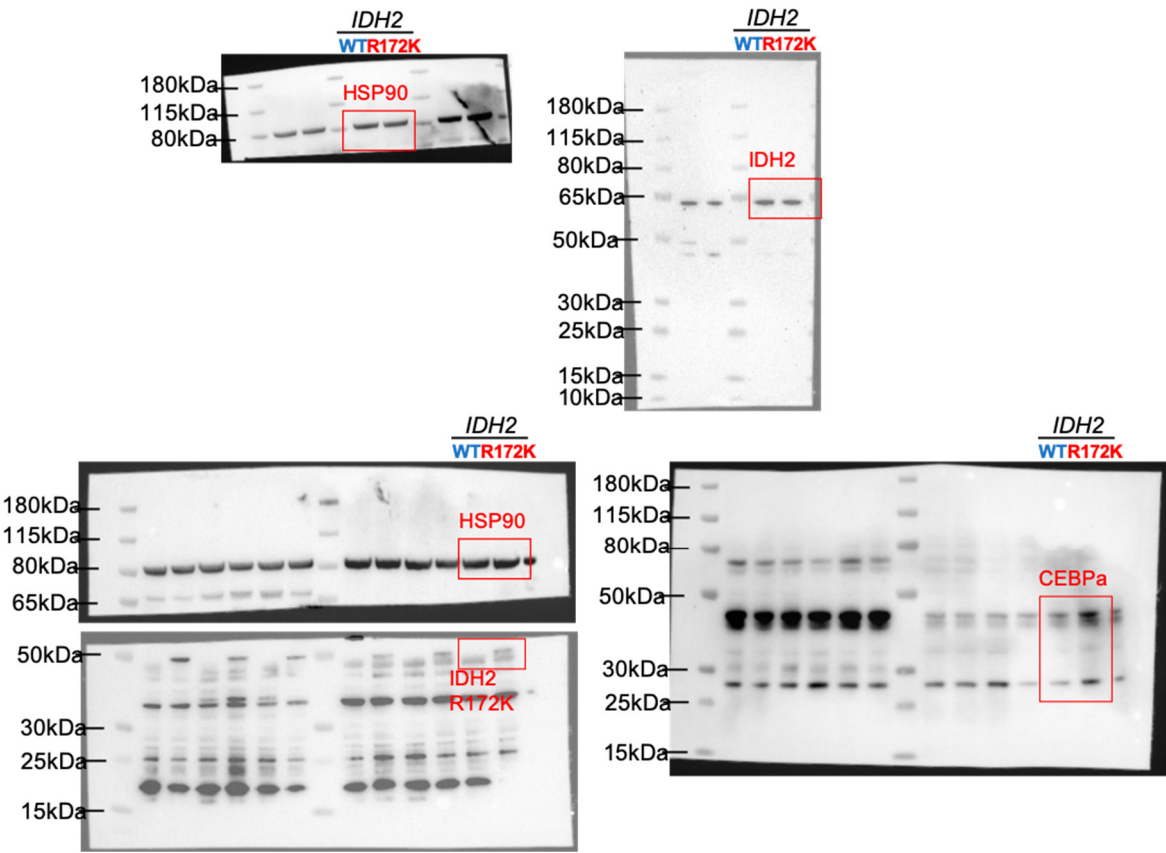



**Figure 2B**

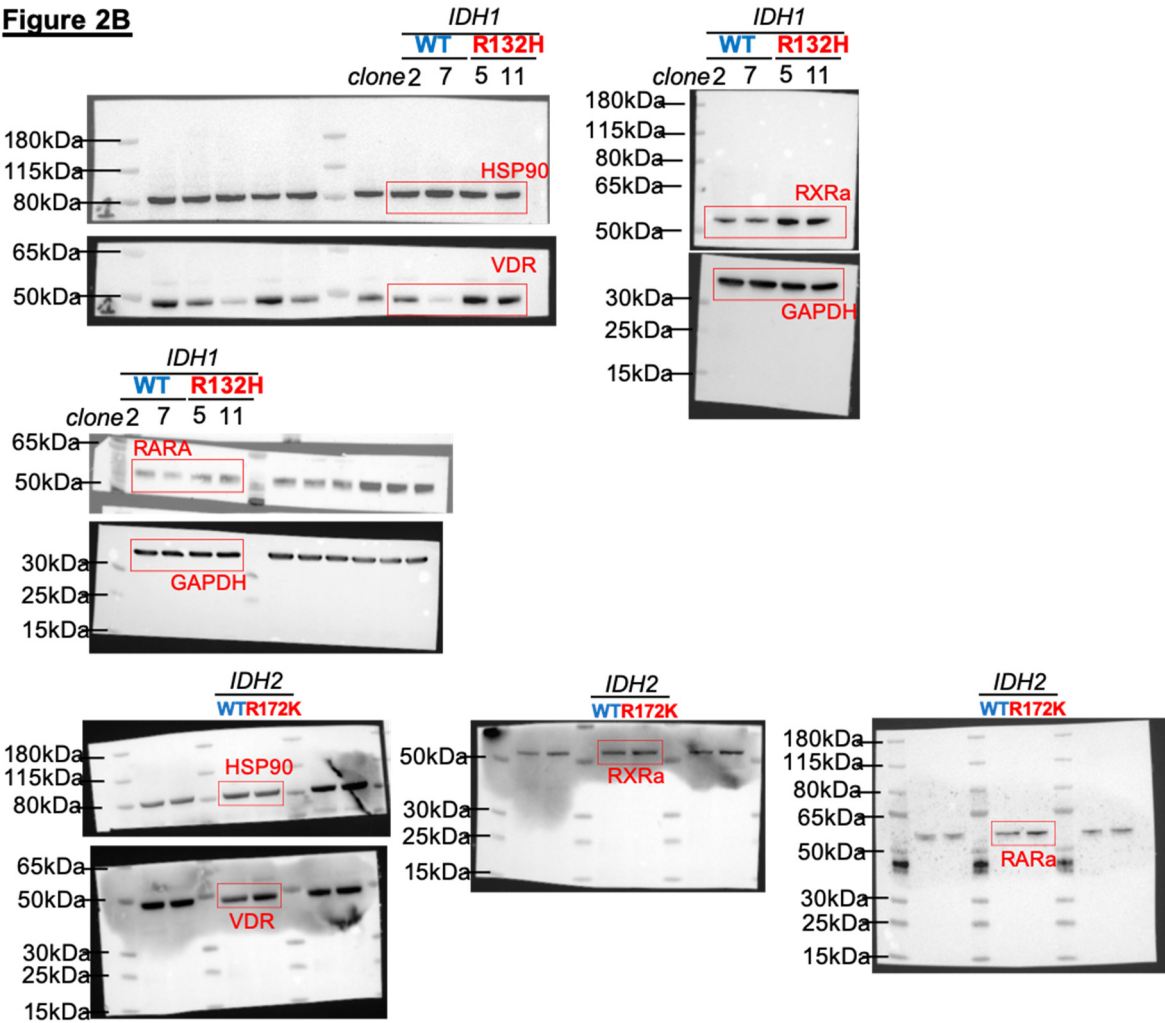

**Figure 2D**

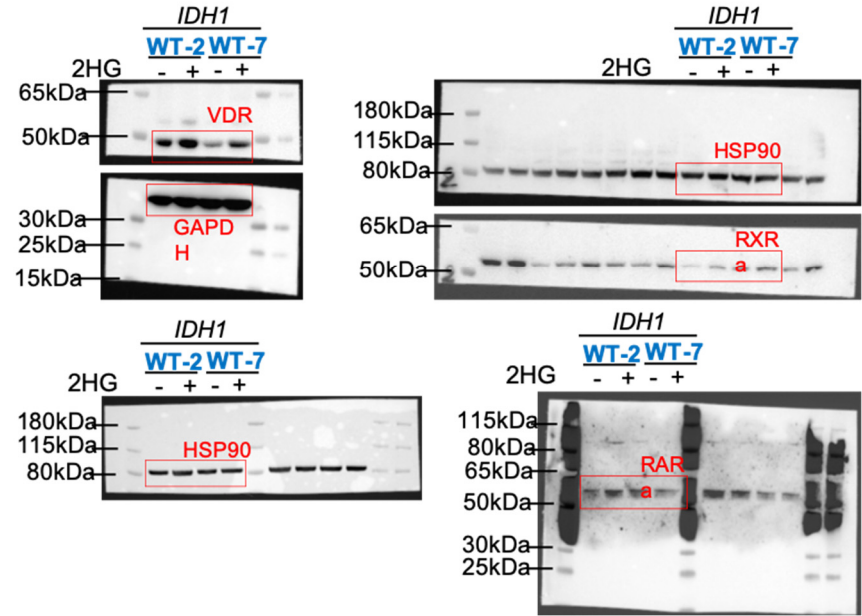



**Figure 2F**

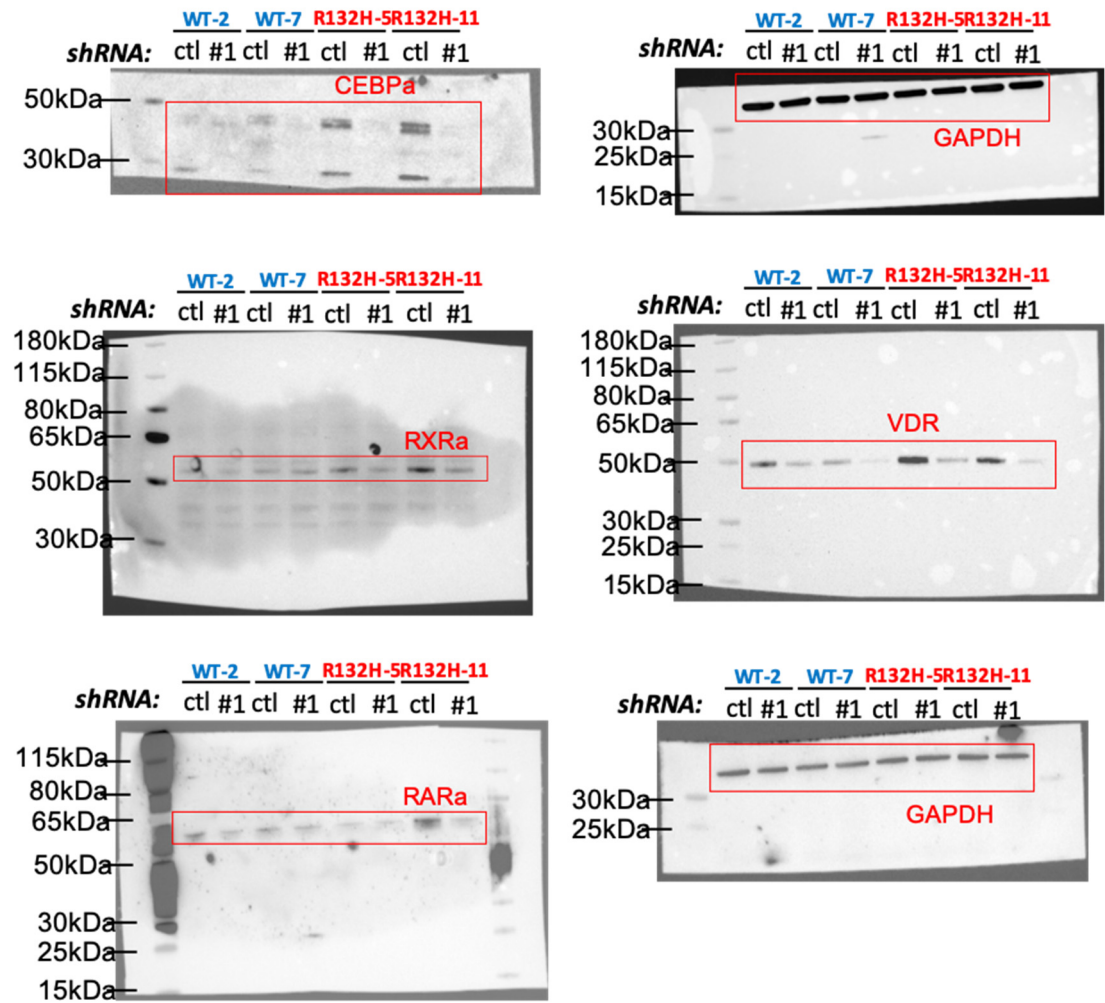

**Figure 2G**

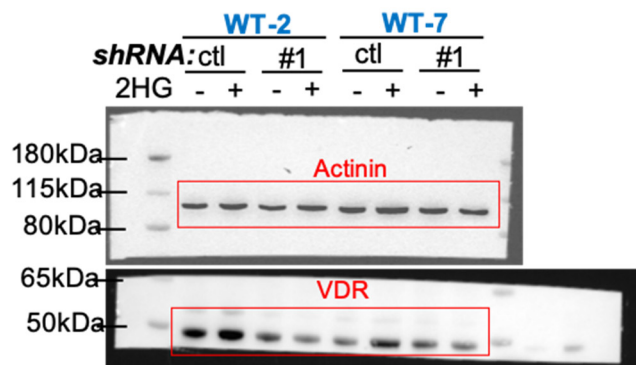

Figure S3A

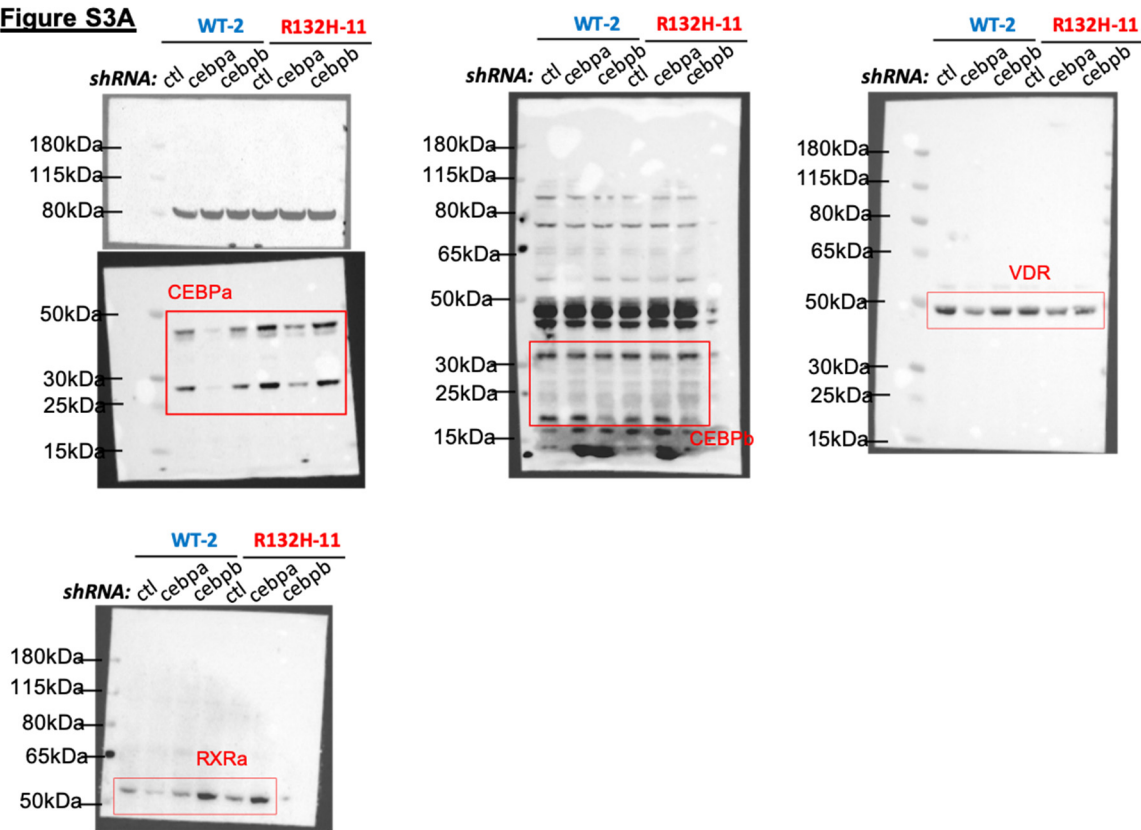

Figure S3B

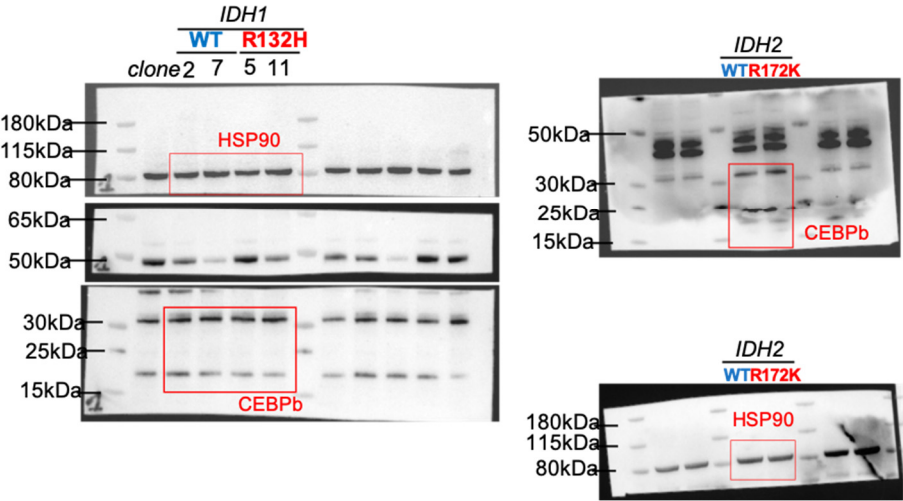

**Figure S3C**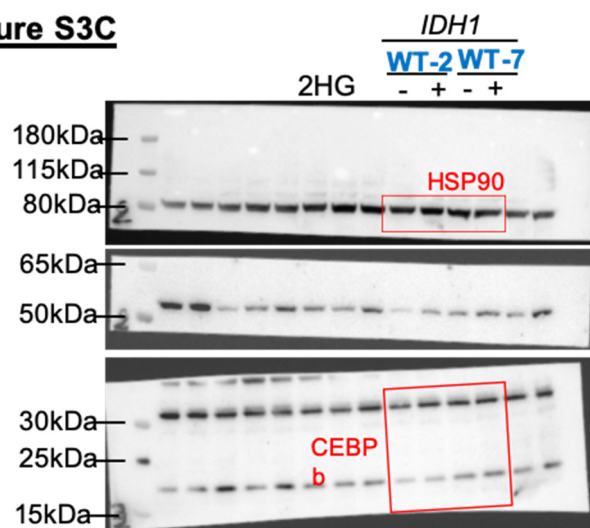**Figure S6.** Uncropped western blot images.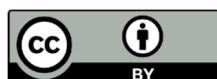

© 2021 by the authors. Licensee MDPI, Basel, Switzerland. This article is an open access article distributed under the terms and conditions of the Creative Commons Attribution (CC BY) license (<http://creativecommons.org/licenses/by/4.0/>).
